# Supplementary material for: Patient-initiated questions: How can doctors encourage them and improve the consultation process? A qualitative study
Source: PubMed Central journal article supplement — BMJ Open. 2013 Oct 16;3(10):e003112. doi: 10.1136/bmjopen-2013-003112 (PMC3808777; doi:10.1136/bmjopen-2013-003112), 2013-10-16
Supplement: bmjopen-2013-003112.draft_revisions.pdf [file bmjopen-2013-003112.draft_revisions.pdf]

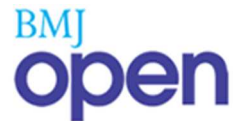

**Patient initiated questions: how can doctors encourage them and improve the consultation process? A qualitative study**

|                                                                                                                                                                                                                                                 |                                                                                                                                                                                                                                                         |
|-------------------------------------------------------------------------------------------------------------------------------------------------------------------------------------------------------------------------------------------------|---------------------------------------------------------------------------------------------------------------------------------------------------------------------------------------------------------------------------------------------------------|
| Journal:                                                                                                                                                                                                                                        | <i>BMJ Open</i>                                                                                                                                                                                                                                         |
| Manuscript ID:                                                                                                                                                                                                                                  | bmjopen-2013-003112                                                                                                                                                                                                                                     |
| Article Type:                                                                                                                                                                                                                                   | Research                                                                                                                                                                                                                                                |
| Date Submitted by the Author:                                                                                                                                                                                                                   | 23-Apr-2013                                                                                                                                                                                                                                             |
| Complete List of Authors:                                                                                                                                                                                                                       | Murtagh, Ged; Imperial College London, Surgery and Cancer<br>Furber, Lynn; University of Leicester, Department of Cancer Studies and Molecular Medicine<br>Thomas, Anne; Leicester Royal Infirmary, Department of Cancer Studies and Molecular Medicine |
| <b>Primary Subject Heading</b>:                                                                                                                                                                                                                 | Communication                                                                                                                                                                                                                                           |
| Secondary Subject Heading:                                                                                                                                                                                                                      | Oncology                                                                                                                                                                                                                                                |
| Keywords:                                                                                                                                                                                                                                       | QUALITATIVE RESEARCH, ONCOLOGY, MEDICAL EDUCATION & TRAINING                                                                                                                                                                                            |
| <p>Note: The following files were submitted by the author for peer review, but cannot be converted to PDF. You must view these files (e.g. movies) online.</p> <p>New_patients1.3approved[1].docm<br/>Follow_up_patients1.3approved[1].docm</p> |                                                                                                                                                                                                                                                         |

SCHOLARONE™  
Manuscripts

1  
2  
3 **Patient initiated questions: how can doctors encourage them and improve the consultation**  
4 **process? A qualitative study**  
5  
6  
7

8  
9 Dr. GM Murtagh,<sup>1</sup> Dr L Furber<sup>2</sup> Dr. AL Thomas<sup>3</sup>  
10  
11

12  
13  
14  
15  
16 <sup>1</sup> Senior Lecturer in Clinical Communication, Division of Surgery, Department of Surgery and  
17 Cancer, St Mary's Campus, Imperial College London, South Wharf Road, London W2 1BL  
18 [g.murtagh@imperial.ac.uk](mailto:g.murtagh@imperial.ac.uk)  
19  
20  
21

22  
23 <sup>2</sup> Senior Nurse Researcher, Department of Cancer Studies and Molecular Medicine  
24 Robert Knighton Clinical Sciences Building, University of Leicester, Leicester Royal Infirmary,  
25 Leicester LE2 7LX  
26  
27  
28

29  
30 <sup>3</sup> Reader and Consultant in Medical Oncology, Department of Cancer Studies and Molecular  
31 Medicine, Leicester Royal Infirmary  
32 Leicester LE 1 5WW  
33  
34  
35  
36  
37  
38

39 **Correspondence to:**  
40  
41

42 Dr. G.M. Murtagh  
43 Division of Surgery, Department of Surgery and Cancer, St Mary's Hospital,  
44 Imperial College London, South Wharf Road, London W2 1BL  
45  
46 [g.murtagh@imperial.ac.uk](mailto:g.murtagh@imperial.ac.uk)  
47  
48  
49  
50  
51  
52

53 **Manuscript word count 3,505**  
54

55 **Abstract word count: 237**  
56  
57  
58  
59  
60

## Abstract

**Objective:** To investigate the circumstances under which patients initiate direct questions in Oncology consultations

**Design:** Conversation analysis of 47 consultations between oncologists and cancer patients

**Setting:** An oncology clinic at a teaching hospital in the East Midlands.

**Participants:** 16 Oncologists and 67 cancer patients

**Outcome measure:** Patient initiated direct questions

**Results:** On the whole patients' direct questions are designed to seek specific information regarding, the cancer itself, treatment options or their experience of symptoms. When patients do ask direct questions they typically follow the announcement of test results where some reference to the details of those results, is provided. More specifically, there is a relation between showing the patient their scan/x-ray results, patient involvement and patient initiated direct questions. Higher levels of patient initiated direct questions were clustered around occasions where doctors provided information and explanations of test results (twelve consultations) sometimes with direct reference to scan or x-ray results (seven consultations).

**Conclusions:** This study highlights the importance of careful explanation of diagnostic evidence as a factor contributing to increased patient involvement. More specifically, the findings suggest

1  
2  
3 that, when appropriate, invoking diagnostic evidence (e.g. scan or x-ray results) is an effective  
4 way of increasing levels of patient question asking. Doctors need to be able to encourage patient  
5 question asking to ensure that patients have at their disposal an important means through which  
6 they can determine their information needs. Although these results come from a study of  
7 oncology consultations, this finding may be transferable to other clinical contexts.  
8  
9  
10  
11  
12  
13  
14  
15  
16  
17  
18  
19  
20  
21  
22  
23  
24  
25  
26  
27  
28  
29  
30  
31  
32  
33  
34  
35  
36  
37  
38  
39  
40  
41  
42  
43  
44  
45  
46  
47  
48  
49  
50  
51  
52  
53  
54  
55  
56  
57  
58  
59  
60

## Article Summary

- In cancer care patient question asking can significantly influence the provision of information from the doctor.
- The paper extends the existing research into communication in cancer care by reporting on distinctive patterns of communication behaviour which influence, in this case, patient question asking.

## Key Messages

- The frequency of direct questions initiated by patients in oncology consultations is relatively low.
- Explicating test results alongside diagnostic evidence increases the chances of patient initiated direct questions in oncology consultations.
- This finding has implications for understanding how doctors can encourage patient questions within cancer care and, potentially, other clinical settings.

## Strengths and Limitations of this study

- The strength of the study is that it targets actual instances of question asking behaviour in relation to other situational variables in the consultation.

- The study is limited by its sole reliance on audio recordings of consultations.

Consequently, other aspects of social interaction, e.g. eye contact, bodily comporment etc which can also have a significant influence on the content of the consultation, have not been included.

For peer review only

## Introduction

One of the main problems oncologists face in the consultation is the difficulty of accurately gauging the patient's information needs.<sup>1,2</sup> Studies have examined patient preferences for information provision and involvement<sup>1,3,4,5</sup> and have shown, among other things, that patients do want specific information concerning their illness.<sup>4,5</sup> However, patients' information needs are not static and there can be significant variations between patients in terms of their preferences for the timing, content and detail of information they require. Such variations may change during the course of an illness and even during the course of a single consultation depending on the type of information a patient receives.<sup>1</sup> Consequently, patients' attempts to elicit information from doctors also varies. These contingencies indicate a real need to understand more about the conditions under which patients actively seek information and, more specifically, the kinds of communication behaviours patients use to seek out information. Among these behaviours, question asking is key, as it can be used as a basic form of information seeking.<sup>6</sup> When patients ask questions it allows them to shape their own levels of involvement<sup>8</sup> and handle the contingencies of information exchange.<sup>9</sup> In addition, patient question asking has been linked to improved information provision.<sup>8,10</sup>

These findings still beg the question, how and when do patients ask questions? In the context of cancer care studies have shown that direct questions (alongside indirect cues) occur most often during the treatment phase of the consultation<sup>11</sup>; that companions who accompany patients, tend to ask more questions than patients particularly in relation to treatment and diagnosis<sup>12</sup>; that

1  
2  
3 ethnic and racial differences between patients can reflect differences in levels of question asking  
4 and direct question asking<sup>13</sup>; that question prompt lists can encourage patient question asking  
5 particularly in relation to prognosis and diagnosis.<sup>14,15</sup> Moreover, patients who receive an answer  
6 to their question demonstrate better psychological adjustment following the consultation than  
7 those who ask questions but don't receive a response.<sup>16, 17</sup>

8  
9  
10  
11  
12  
13  
14  
15  
16  
17  
18  
19 These studies provide valuable direction in understanding some of the factors behind patient  
20 question asking in cancer care. However, there is still a lot that is unknown about the specific  
21 situational variables which underpin and shape patient question asking in relation to the doctor's  
22 communication behaviours. The extent to which patients initiate information seeking, in the first  
23 place, is often contingent on the doctor's communicative style. The import of this lies in the fact  
24 that when patients seek information (e.g. through asking questions), doctors typically respond in  
25 more informative and accommodative ways,<sup>18</sup> simply because patient questions are one of the  
26 ways in which patients establish their information needs. The purpose of this study was to  
27 capture the interactional and situational variables that occur alongside patient initiated questions  
28 to establish possible connections between the two.

## 29 30 31 32 33 34 35 36 37 38 39 40 41 42 43 44 45 46 **Methods**

47  
48  
49  
50  
51 The study was carried out in a large UK Cancer Centre. LF recruited patients (with different  
52 types of cancers) attending the oncology department (n=77) as well as a mix of oncology  
53 consultants and specialist registrars. Both newly diagnosed and follow up patients were recruited  
54  
55  
56  
57  
58  
59  
60



1  
2  
3 to ensure maximum variability in our sample group. Following each consultation patients were  
4 invited to complete a satisfaction questionnaire and interviews were conducted with the patients  
5  
6 by LF shortly after their consultation. We audio recorded 47 consultations which were then  
7  
8 transcribed and analysed using conversation analysis.<sup>22</sup> This paper reports on the first 30 of those  
9  
10 consultations.  
11  
12  
13  
14  
15  
16  
17  
18

### 19 **Analysis**

20  
21 This analysis involved examining the turn-by-turn construction of utterances between doctor and  
22 patient. This allowed us to identify the occasions where patients ask direct questions. It also  
23 enabled us to target the link between the different ways in which test results were delivered and  
24 levels of patient initiated questions. For the purposes of analysis we defined a direct question as  
25 that which is initiated solely by the patient, without a verbal prompt from the doctor and which  
26 targets a specific topic.  
27  
28  
29  
30  
31  
32  
33  
34  
35  
36  
37  
38  
39

40 Audio recordings of the oncology consultations were subjected to repeated listening and were  
41 then transcribed and analysed using conversation analysis, a method of analysis which details  
42 characteristics of speech exchange including phraseology, pauses, pace and intonation. Analysis  
43 with this level of detail allowed us to identify typical as well as variable features of doctor and  
44 patient talk. We then re-analysed the data to see how those features influenced levels of patient  
45 involvement patient initiated question asking. For example, we started to notice how variations  
46 in the delivery format of test results can shape the patient's response and more specifically  
47 influence their levels of question asking. The transcription symbols used to indicate these  
48  
49  
50  
51  
52  
53  
54  
55  
56  
57  
58  
59  
60

1  
2  
3 characteristics are provided in table 1. The consultations were examined with a view to  
4  
5 identifying some of the systematic and recurrent properties of patient question asking to see if  
6  
7 that would provide further direction in improving consultation practice. Some key sequences  
8  
9 from the consultations are presented verbatim in the text and the symbols used for characteristics  
10  
11 of speech exchange are provided in table 1.  
12  
13  
14

## 15 16 17 18 19 **Results**

20  
21  
22  
23  
24 Our focussed sample of 30 consultations in total came to 451.30 mins, just over 7.5 hours of  
25  
26 consultation time with the average length of the consultation at 15.04 mins. In 7 out of the 30  
27  
28 consultations (just under 60 mins of consultation time) there were no patient initiated direct  
29  
30 questions. In the remaining 23 consultations there were 76 instances of patients asking questions  
31  
32 (avg. 2.5 direct patient questions per consultation). In 5 out of those 23 consultations (22%)  
33  
34 patients' questions came at the end (within 3-4 mins of the end of the consultation) following a  
35  
36 prompt from the doctor. In 6 out of the 23 consultations (26%) there is evidence of indirect or  
37  
38 embedded questions arising at different junctures of the consultation following a prompt from  
39  
40 the doctor. In 12 of the 23 consultations, (52%) patient initiated direct questions occur  
41  
42 specifically in relation to discussion of test results. In 7 of these 12 consultations (58%) patient  
43  
44 initiated question asking occurs following a careful explanation of test results and diagnostic  
45  
46 evidence e.g. the doctor's use of scan or x-rays. In only two consultations did the patient decline  
47  
48 to ask a question following and invitation to do so from the doctor.  
49  
50  
51  
52  
53  
54  
55  
56  
57  
58  
59  
60

1  
2  
3 We noted a number of variations in the way in which doctors announce test results. Our main  
4  
5 finding, however, is that patients are more inclined to initiate direct questions when doctors  
6  
7 explicate test results with direct reference to the diagnostic evidence e.g. x-rays or scans. We  
8  
9 identified two types of information delivery each resulting in different types of patient response,  
10  
11 the most marked difference being levels of patient initiated question asking. In delivery type 1,  
12  
13 test results were delivered in a very general way without elaboration (e.g. ‘your scan results are  
14  
15 fine’). With this type of delivery patient initiated questions were absent or minimal. In delivery  
16  
17 type 2 (‘your scan shows that’) the doctor elaborated or explained the test results sometimes  
18  
19 invoking the scan or the x-ray to do so. This type of delivery typically positively influenced  
20  
21 levels of patient involvement in the consultation and prompted more patient initiated direct  
22  
23 questions and consequently more information provision from the doctor.  
24  
25  
26  
27  
28  
29  
30  
31  
32  
33

#### Transcription symbols

- 34  
35  
36 ° °            Talk marked by the degree sound indicates words that are softly spoken  
37  
38 (.)            A full stop in brackets indicates a micro pause  
39  
40 (1.0), (0.5)    indicates silence in seconds and tenths of seconds  
41  
42 [Okay  
43  
44 [Yes            Talk which is preceded by a square bracket indicates overlap in speech between  
45  
46 two different speakers  
47  
48 =              Talk marked with the equals sign at the end of one line and the beginning of  
49  
50 another indicates no pause between the end of one utterance and the start of another  
51  
52  
53  
54  
55  
56  
57  
58  
59  
60

1  
2  
3 **Type 1**  
4  
5  
6  
7  
8

9 **Table 1**

10  
11 **0 patient initiated questions**  
12  
13

- 14  
15  
16 1. Doctor: The CT scan result is here (0.5) and that was  
17  
18 2. basically normal erm nothing to suggest any new no new  
19  
20 3. glands you have got some changes on your erm (4.0) lungs  
21  
22 4. from(.) previous radiotherapy (0.5)uhm (1.5) so that's your  
23  
24 5. CT scan and I'm just trying to find the (0.5) lung function  
25  
26 6. tests(.) when did you have those done  
27  
28  
29  
30 7. Patient: (2.0) had them done  
31  
32  
33 8. Husband: Two weeks ago  
34  
35  
36  
37  
38  
39  
40  
41

42 **Table 2**

43  
44 **0 initiated patient questions**  
45  
46

- 47  
48 1. Doctor: Okay (.) um (0.5) scan result was fine  
49  
50 2. Patient: Good  
51  
52 3. Doctor: Good okay an everything's stable on the in the  
53  
54 4. bones  
55  
56  
57  
58  
59  
60

1  
2  
3 5. Patient: Right  
4  
5  
6  
7

8 **Table 3**

9  
10 **0 patient questions**

11  
12  
13  
14 1. Doctor: Your scan shows everything is the same  
15  
16 2. Patient: Good  
17  
18 3. Doctor: So that's very good  
19  
20  
21  
22

23  
24 **Table 4**

25  
26 **1 patient initiated question**

27  
28  
29  
30  
31 1. Doctor: And you've had an echocardiogram of your heart an  
32  
33 2. that's all fine  
34  
35 3. Patient: Is it [okay  
36  
37 4. Doctor: [you had that done on?  
38  
39 5. Patient: °Last Friday°  
40  
41 6. Doctor: Last Friday that's all fine (.) no problems so  
42  
43 7. that's good news could I er examine you  
44  
45  
46  
47  
48  
49  
50  
51  
52  
53  
54  
55  
56  
57  
58  
59  
60

1  
2  
3 The sequences in tables 1-4 show the announcement of diagnostic results depicting the type 1  
4 delivery. In each case the results are delivered in a general, non-specific way characterised by a  
5 general clinical assessment, 'fine', 'normal' or 'no change'. In each case this type of delivery  
6 produces a minimal response from the patient. It seems that this is partly to do with the fact that  
7 the general delivery projects a paternalistic approach where the doctor presents his/her  
8 interpretation of the results as the authoritative one, without any specific reference to further  
9 details of findings.<sup>21</sup> Consequently, the patient is invited to accept the diagnostic judgement of  
10 the doctor and the general, non-specific explanation of the results is reflected in the general, non-  
11 specific response provided by the patient.<sup>19</sup> In almost a third of the sample, apart from the  
12 sequence in table 4, the patient does not question or inquire further into the results following the  
13 type 1 delivery. In table 4 for the patient does ask a question, but again this is presented in a  
14 general form 'is it okay?' again reflecting the general way in which the results of the  
15 echocardiogram is presented. However, later on following a physical examination the patient  
16 targets back on this assessment, after a physical examination, following a prompt from the  
17 doctor.

- 18 1. Doctor: Is there anything you wanted to ask at all?
- 19 2. Patient: I did want to ask about my heart function
- 20 3. Doctor: Ya sure
- 21 4. Patient: I know you said the echocardiograms are oka:y
- 22 5. Doctor: Yes
- 23 6. Patient: but has it (.) erm deteriorated at all[through
- 24 7. Doctor: [no no

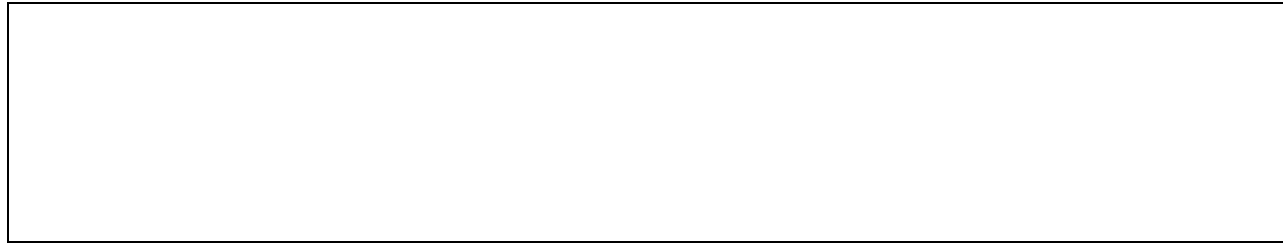

## Type 2

### Table 1

#### 1patient initiated question

1. Doctor: The head scan, the CT and the MRI show that there
2. is something in the bones but what is unusual is that it
3. seems to be more on the right hand side than the left and I
4. think it was the left eye you were having problems with?
5. Patient: (0.5) Don't they cross?
6. Doctor: Well sometimes if it's more of a visual problem
7. they do cross yeah

In this sequence there are two distinctive features which appear to shape the patient's response. Firstly, the doctor delivers the findings from the scan and produces an expression of uncertainty regarding which eye the patient was having problems with. Secondly, there is a half second pause following the delivery which not only provides the patient with the opportunity to respond but also scope to negotiate the nature of that response.

Table 2

## 5 patient initiated questions

1. Doctor: Your scan shows that things are very much the
2. same, maybe slightly bigger but literally by 4mm both in
3. the chest and in the bowel
4. Patient: Is it possible for me to see the scan?
5. Doctor: Yes, these are your lungs, that's your heart
6. Patient: Where's the tumor?
7. Doctor: That's it
8. Patient: It's there? So when I saw it previously it was
9. about that size?
10. Doctor: It's only a couple of centimetres most
11. Patient: As small as that? In fact it's smaller
12. than when I first came about walnut size
13. Doctor: It doesn't really say how big it was
14. initially
15. Patient: So it would be about like that wouldn't it?
16. Doctor: Yeah
17. Patient: It was on the lymph gland, is that the lymph
18. gland?
19. Doctor: No that's your bowel that's the tumor and
20. that's your bowel there and that's your aneurism
21. they've



1  
2  
3  
4  
5  
6  
7  
8  
9  
10  
11  
12  
13  
14  
15  
16  
17  
18  
19  
20  
21  
22  
23  
24  
25  
26  
27  
28  
29  
30  
31  
32  
33  
34  
35  
36  
37  
38  
39  
40  
41  
42  
43  
44  
45  
46  
47  
48  
49  
50  
51  
52  
53  
54  
55  
56  
57  
58  
59  
60

|                                      |
|--------------------------------------|
| 22.        measured it for you 55 mm |
|--------------------------------------|

In this sequence the results are delivered and carefully explicated with the inclusion of numerical data specifying the size of the cancerous growth (lines 1-3). This provides the patient with a precise frame of reference regarding the cancer. Interestingly in this case the patient, in response, asks to see the scan (line 4). The doctor then identifies the patient's lungs and heart providing the relevance for the proximal distance of the tumour from the lungs and heart. The patient (line 6) then asks about the location of the tumour, its size (lines 8-9, 11) and finally asks about the lymph gland (line 17-18).

**Table 3**

**2 patient initiated questions**

- |                                                                                                                                                                                                                                                                                                                                                                                                                                                                                                                                                                                                         |
|---------------------------------------------------------------------------------------------------------------------------------------------------------------------------------------------------------------------------------------------------------------------------------------------------------------------------------------------------------------------------------------------------------------------------------------------------------------------------------------------------------------------------------------------------------------------------------------------------------|
| <ol style="list-style-type: none"><li>1. Doctor: The scan is very much the same erm there hasn't</li><li>2. been um any obvious problems there is quite a lot of</li><li>3. fibrosis still but that's to be expected so fibrosis is</li><li>4. healing and scarring</li><li>5. Patient: Where's that?</li><li>6. Doctor: Umm both in the air in the central areas you know</li><li>7. where all the problems originally were with the</li><li>8. swallowing so in the central area and in the tummy um (2.0)</li><li>9. °let me tell you exactly°</li><li>10. Patient: Was that there before?</li></ol> |
|---------------------------------------------------------------------------------------------------------------------------------------------------------------------------------------------------------------------------------------------------------------------------------------------------------------------------------------------------------------------------------------------------------------------------------------------------------------------------------------------------------------------------------------------------------------------------------------------------------|

1  
2  
3  
4  
5  
6  
7  
8  
9  
10  
11  
12  
13  
14  
15  
16  
17  
18  
19  
20  
21  
22  
23  
24  
25  
26  
27  
28  
29  
30  
31  
32  
33  
34  
35  
36  
37  
38  
39  
40  
41  
42  
43  
44  
45  
46  
47  
48  
49  
50  
51  
52  
53  
54  
55  
56  
57  
58  
59  
60

11. Doctor: They've said there's an increase in the volum  
12. of that fibrosis  
13. Patient: So basically that's scar tissue, is that what  
14. you're saying?

This delivery of diagnostic news starts out almost as a type 1 delivery ('The scan is very much the same') but then goes on to point out that fibrosis is still present which is 'to be expected'. The doctor then explains the term fibrosis and the patient responds (line 5) by asking where it is. When the doctor explains the location of the fibrosis, the patient asks if it was present before. The doctor then refers to the report regarding the increase in fibrosis and the patient (line 13) then presents a gloss of the meaning of the news which is posed as a question.

#### Table 4

##### 5 patient initiated questions

1. Doctor: So they've reported it as stable disease basically  
2. nothing new to find there are some lymph nodes in your  
3. pelvis but there's nothing different from that  
4. Patient: Just where exactly?  
5. Doctor: Did you want to look at your scan you [can  
6. Patient: [Will I be  
7. able to tell from that?  
8. Doctor: Well we can look at it together  
9. Patient: Yeah

- 1  
2  
3  
4  
5  
6  
7  
8  
9  
10  
11  
12  
13  
14  
15  
16  
17  
18  
19  
20  
21  
22  
23  
24  
25  
26  
27  
28  
29  
30  
31  
32  
33  
34  
35  
36  
37  
38  
39  
40  
41  
42  
43  
44  
45  
46  
47  
48  
49  
50  
51
10. Doctor: (3.0) So this is your pelvis
11. Patient: Right
12. Doctor: This is your right hip and that is your left
13. hip=
14. Patient: =Mhm
15. Doctor: And then you've got some lymph nodes that are
16. predominantly on the on the right hand side
17. Patient: Yes right so the other side is what they
18. should look like is it?
19. Doctor: Yeah you've got some tiny lymph nodes there
20. they're normally a centimeter and a half is as big as
21. you'd expect them to be normally
22. Patient: Right
23. Doctor: You have got some higher up as well
24. Patient: So that's more into the tummy?
25. Doctor: Yeah
26. Patient: Dya think it is possible that thee enlarged
27. (.) lymph nodes could be (0.5) pressing on a ne::rve
28. [or
29. Doctor: [Sometimes they can do ya ya

52  
53  
54  
55  
56  
57  
58  
59  
60

The diagnostic news in this delivery specifies the fact that there 'are some lymph nodes'. In response the patient asks 'where' exactly' (line 6). The doctor then asks the patient if they would like to look at their scan. Interestingly the patient's next question ('will I be able to tell from

1  
2  
3 that'?) at line 7 manifests the knowledge-competence gap between doctors and patients. This  
4  
5 may partly account for why doctors do not always invite patients to look at scan/x-ray results and  
6  
7 why patients do not always ask to see them when they are available. The doctor's response ('we  
8  
9 can look at it together') bridges this gap by inviting the patient to examine the scan jointly  
10  
11 allowing the doctor to identify, for the patient, key anatomical structures whilst also allowing the  
12  
13 patient to inquire further.  
14  
15  
16  
17  
18  
19  
20

21 The sequences in tables 1-4 show the announcement of diagnostic results depicting the type 2  
22  
23 delivery. In these sequences the results are delivered alongside a clinical assessment which either  
24  
25 includes a numerical reading or further explication of the findings. These features appear to be  
26  
27 interpreted by patients as accommodative of their opinion and understanding. An important  
28  
29 consequence of this is higher levels of patient involvement including more patient initiated  
30  
31 questions.  
32  
33  
34  
35  
36  
37  
38

## 39 Discussion

40  
41  
42  
43  
44  
45

46 In the main, consultations covered topics such as treatment, the progression of the cancer itself  
47  
48 and the symptoms experienced by the patient. Not all topics were addressed in every consultation  
49  
50 and doctors varied in how they dealt with each topic. We found that generally patients' actual  
51  
52 levels of involvement in the consultation were relatively low and patients varied in how active  
53  
54 they were in seeking information. We also found that, on the whole, patients seemed disinclined  
55  
56 to ask questions or show communication behaviours designed to elicit information. This finding  
57  
58  
59  
60

1  
2  
3 is consistent with much earlier research into this topic.<sup>6,17</sup>  
4  
5  
6  
7

8 In relation to discussions of test results between doctor and patient, the data appear to indicate  
9 that there may be a connection between the way in which the results are delivered and the  
10 occurrence of patient initiated direct questions. That is to say, the plainer announcement of  
11 diagnostic results ('your scan is fine' - Type 1), which does not include sharing the diagnostic  
12 evidence projects a more paternalistic approach implicit in which, the patient is expected to  
13 accept the diagnostic judgement of the doctor. It is also characterised by a general explanation of  
14 the results which is reflected in the general response provided by the patient.<sup>19</sup> In contrast the  
15 Type 2 delivery is much more accommodative of patient input. Moreover, the invocation of the  
16 scan or the x-ray, where appropriate, appears to be significant in encouraging patient  
17 involvement and consequently patient initiated direct questions. Incorporating and explaining the  
18 evidence appears to be interpreted by patients as an opportunity to contribute to the consultation  
19 and establish their information needs in an environment within which the patient's  
20 queries/opinions are welcomed. Unless the patient has specifically requested not to see scans or  
21 x-rays, this would appear to be an effective way of encouraging patient involvement generally  
22 and increasing levels of patient question asking. Consequently, patients are then able to establish  
23 and satisfy their information needs in a timely and effective way.  
24  
25  
26  
27  
28  
29  
30  
31  
32  
33  
34  
35  
36  
37  
38  
39  
40  
41  
42  
43  
44  
45  
46  
47

48 In cases where patients did ask more questions, there was no significant increase in consultation  
49 length and no patient refused the offer of looking at examination results. The examples presented  
50 above were carefully selected because they display the most marked variation in consultation  
51 style highlighting clear contrasts between the two types of delivery.  
52  
53  
54  
55  
56  
57  
58  
59  
60

1  
2  
3  
4  
5  
6 A number of different types of intervention have been used in cancer care to help facilitate  
7  
8 patient involvement. For example, question prompt lists have been used quite widely, but their  
9  
10 actual implementation in consultations is not always straightforward and their rates of success do  
11  
12 vary.<sup>15</sup> Moreover, we found in our study, that even when patients entered the consultation with  
13  
14 question lists, they often left the consultation without having asked the questions they came  
15  
16 prepared for.  
17  
18  
19  
20

21  
22 The finding that when the doctor elaborates or explicates findings from the evidence, this can  
23  
24 increase levels of patient involvement has been identified previously in a study of primary care  
25  
26 consultations.<sup>20</sup> Clearly there are important differences between an oncology consultation and a  
27  
28 primary care consultation. However, in relation to consulting behaviours, in both settings there  
29  
30 appear to be striking similarities. That is to say, careful explication of diagnostic findings can  
31  
32 encourage patient involvement such as, in this case, question asking, which in turn can enable  
33  
34 patients to establish their information needs. Further research in this area demands a closer  
35  
36 investigation of what Frankel<sup>9</sup> has described as the ‘presuppositional grounds upon which the  
37  
38 communication situation itself rests’. This would then allow us to identify other consulting  
39  
40 behaviours doctors can utilise to encourage patient involvement.  
41  
42  
43  
44  
45  
46  
47

48 There may be a number of reasons why patients are disinclined to ask questions following the  
49  
50 ‘your scan result is fine’ type of announcement. The minimal responses identified may not  
51  
52 actually be conditioned solely by the type of announcement of test results but may also be a  
53  
54 consequence of patient preference or information needs at that particular moment. As noted, in  
55  
56  
57  
58  
59  
60

1  
2  
3 Type 1, table 4 the patient targets back on a general assessment of the echocardiogram as 'okay'.  
4  
5  
6 This clearly merits further empirical investigation.  
7  
8  
9

## 10 11 **Conclusion** 12 13

14  
15  
16  
17 Currently there is good research evidence indicating that patient initiated question asking should  
18  
19 be encouraged. Doctors need to be able to encourage patient question asking to ensure that  
20  
21 patients have at their disposal an important means through which they can determine and express  
22  
23 their information needs. This study confirms the findings from previous studies showing that  
24  
25 levels of patient initiated questions in Oncology are relatively low. Our study suggests that  
26  
27 patient initiated question asking can be encouraged through timely and deliberate information  
28  
29 giving which incorporates and explanation and display of test results. The findings at this stage  
30  
31 are only suggestive and further exploration is required to establish their actual significance.  
32  
33  
34  
35  
36 Studies which involve closer examination of the actual interactional episodes between doctors  
37  
38 and patients are required to provide a deeper understanding of patient initiated questions and the  
39  
40 situational variables which may influence them.  
41  
42  
43  
44  
45  
46  
47  
48  
49  
50  
51  
52  
53  
54  
55  
56  
57  
58  
59  
60

## References

1. Butow P.N., Maclean M, Dunn S.M., Tattersall M.H.N., Boyer M.J. The dynamics of change: Cancer patients' preferences for information, involvement and support. *Annals of Oncology* 1997; 8: 857-863.
2. Gattellari M, Butow P.N., Tattersall M.H.N. Sharing decisions in cancer care. *Social Science and Medicine* 2001; 52: 1865-1878.
3. Leydon G.M., Boulton M, Moynihan C, Jones A, Mossman J, Boudioni M, et al. Cancer patients' information needs and information seeking behaviour: in-depth interview study. *BMJ* 2000; 320: 909-913.
4. Jenkins V., Fallowfield L., Saul J. Information needs of patients with cancer: results from a large study in UK cancer centres. *British Journal of Cancer* 2001; 84: 48-51.
5. Cox A., Jenkins V., Catt S., Langridge C., and Fallowfield L. Information needs and experiences: An audit of UK cancer patients. *European Journal of Oncology Nursing*. 2006; Vol. 10 Issue 4 263-272.
6. Beisecker A.E. and Beisecker T.D. Patient information seeking behaviours when communicating with doctors. *Medical Care*. 1990; Vol. 28, No. 1: 19-28
7. Cegala D, Marinelli T and Post D. The effect of patient communication skills training on compliance. *Archives of Family Medicine*. 2000; 9: 957-964.
8. Street R.L. and Millay B. Analysing patient participation in medical encounters. *Health Communication*. 2001; Vol. 13, Issue 1: 61-73



- 1  
2  
3 9. Frankel R, Talking in interviews: a dispreference for patient initiated questions in  
4  
5 physician-patient encounters. In Psathas G, (ed.) Interaction Competence. Lanham, MD:  
6  
7 University Press of America, 1990: 231-261  
8  
9
- 10  
11 10. Cegala D, Street R.L., and Clinch R.C. The impact of patient participation on physicians'  
12  
13 information provision during a primary care medical interview. Health Communication,  
14  
15 2007; Vol. 21, Issue 2: 177-185.  
16
- 17  
18 11. Butow P.N. et al. Oncologists reactions to cancer patients' verbal cues. Psycho-oncology.  
19  
20 Vol. 11, Issue 1 2002; 47-58.  
21
- 22  
23 12. Eggly S. et al. Information seeking during "bad news" oncology interactions: Question  
24  
25 asking by patients and their companions. Social Science and Medicine, 2006; 63: 2974-  
26  
27 2985.  
28
- 29  
30 13. Eggly S. et al. Variation in question asking during cancer clinical interactions: A  
31  
32 potential source of disparities in access to information. Patient Education and  
33  
34 Counselling, 2011; Vol. 82, Issue 1: 63-68.  
35
- 36  
37 14. Brown R, Butow PN, Boyer MJ and Tattersall MHN. Promoting patient participation in  
38  
39 the cancer consultation: evaluation of a prompt sheet and coaching in question asking.  
40  
41 British Journal of Cancer 1999; Vol. 80: 242-248  
42
- 43  
44 15. Dimoska A, Tattersall M.H.N, Butow PN, Shepherd H. Can a "prompt list" empower  
45  
46 cancer patients to ask relevant questions. Cancer 2008; Vol. 113, Issue 2: 225-237.  
47
- 48  
49 16. Butow PN, Dunn SM, Tattersall MHN, and Jones QJ. Computer-based interaction  
50  
51 analysis of the cancer consultation. British Journal of Cancer 1995; Vol. 71: 1115-1121.  
52  
53  
54  
55  
56  
57  
58  
59  
60

- 1  
2  
3  
4 17. Street RL Information giving in medical consultations: The influence of patients'  
5  
6 communicative styles and personal characteristics. *Social Science and Medicine* 1991;  
7  
8 Vol 32. Issue 5: 541-548.  
9
- 10  
11 18. Street RL, Gordon HS, Ward MM, Krupat E, Kravitz RL. Patient participation in medical  
12  
13 consultations: Why some patients are more involved than others. *Medical Care* 2005; Vol  
14  
15 43, No. 10: 960-969.  
16
- 17  
18 19. Collins S, Drew P, Watt I, and Entwistle V. 'Unilateral' and 'bilateral' practitioner  
19  
20 approaches in decision-making about treatment. *Social Science and Medicine* 2005; 61:  
21  
22 2611-2627.  
23
- 24  
25 20. Perakyla A, Communicating and responding to diagnosis in Heritage J, and Maynard D.  
26  
27 (eds.) *Communication in Medical Care*. 2006: 214-247.  
28
- 29  
30 21. Pomerantz A, and E. Sean Rintel. Practices for reporting and responding to test results  
31  
32 during medical consultations: enacting the roles of paternalism and independent  
33  
34 expertise. *Discourse Studies* 2004; Vol. 6 (1): 9-26.  
35
- 36  
37 22. Heritage J, and Maynard D. *Communication in Medical Care: Interaction between*  
38  
39 *Primary Care Physicians and Patients*. 2006. Cambridge: Cambridge University Press.  
40  
41  
42  
43  
44  
45  
46  
47  
48  
49  
50  
51  
52  
53  
54  
55  
56  
57  
58  
59  
60

## Copyright/licence for publication

“The Corresponding Author has the right to grant on behalf of all authors and does grant on behalf of all authors, a [worldwide licence](#) to the Publishers and its licensees in perpetuity, in all forms, formats and media (whether known now or created in the future), to i) publish, reproduce, distribute, display and store the Contribution, ii) translate the Contribution into other languages, create adaptations, reprints, include within collections and create summaries, extracts and/or, abstracts of the Contribution, iii) create any other derivative work(s) based on the Contribution, iv) to exploit all subsidiary rights in the Contribution, v) the inclusion of electronic links from the Contribution to third party material where-ever it may be located; and, vi) licence any third party to do any or all of the above.”

## Competing interests

All authors have completed the ICMJE uniform disclosure form at [www.icmje.org/coi\\_disclosure.pdf](http://www.icmje.org/coi_disclosure.pdf) (available on request from the corresponding author) and declare: no support from any organisation for the submitted work; no financial relationships with any organisations that might have an interest in the submitted work in the previous three years; no other relationships or activities that could appear to have influenced the submitted work."

## Contributorship statement

All authors contributed to the research study. As PI AT led the study design with contributions from GM and LF. GM and LF led the data collection and analysis with contributions from AT. The first draft of the paper was prepared by GM and then subsequently all authors contributed to data interpretation and revisions to the manuscript. All authors had full access to the data derived from the study and can take full responsibility for the integrity of the data and the accuracy of the data analysis.

## Data sharing

There is no additional data available

## Ethics approval

This paper is an outcome from a study funded by the NIHR Research for Patient Benefit Programme. The funding body did not partake in the design of the study, collection, analysis and interpretation of data, writing and submission of the article for publication. The study received ethical approval from the Nottingham research ethics committee 2 ID: 09/H0408/34. All participants in the study gave informed consent before taking part. All authors are independent

1  
2  
3 from the funding body. Each had had full access to all of the data in the study and can take  
4 responsibility for the integrity of the data and the accuracy of the data analysis  
5  
6

7 This paper presents independent research funded by the National Institute for Health Research  
8 (NIHR) under its Research for Patient Benefit (RfPB) Programme (Grant Reference Number PB-  
9 PG-0807-14122). The views expressed are those of the author(s) and not necessarily those of the  
10 NHS, the NIHR or the Department of Health.  
11  
12  
13  
14  
15  
16  
17  
18  
19  
20  
21  
22  
23  
24  
25  
26  
27  
28  
29  
30  
31  
32  
33  
34  
35  
36  
37  
38  
39  
40  
41  
42  
43  
44  
45  
46  
47  
48  
49  
50  
51  
52  
53  
54  
55  
56  
57  
58  
59  
60

For peer review only

# Please wait...

If this message is not eventually replaced by the proper contents of the document, your PDF viewer may not be able to display this type of document.

You can upgrade to the latest version of Adobe Reader for Windows®, Mac, or Linux® by visiting <http://www.adobe.com/products/acrobat/readstep2.html>.

For more assistance with Adobe Reader visit <http://www.adobe.com/support/products/acrreader.html>.

Windows is either a registered trademark or a trademark of Microsoft Corporation in the United States and/or other countries. Mac is a trademark of Apple Inc., registered in the United States and other countries. Linux is the registered trademark of Linus Torvalds in the U.S. and other countries.

# Please wait...

If this message is not eventually replaced by the proper contents of the document, your PDF viewer may not be able to display this type of document.

You can upgrade to the latest version of Adobe Reader for Windows®, Mac, or Linux® by visiting [http://www.adobe.com/go/reader\\_download](http://www.adobe.com/go/reader_download).

For more assistance with Adobe Reader visit <http://www.adobe.com/go/acrreader>.

Windows is either a registered trademark or a trademark of Microsoft Corporation in the United States and/or other countries. Mac is a trademark of Apple Inc., registered in the United States and other countries. Linux is the registered trademark of Linus Torvalds in the U.S. and other countries.

# Please wait...

If this message is not eventually replaced by the proper contents of the document, your PDF viewer may not be able to display this type of document.

You can upgrade to the latest version of Adobe Reader for Windows®, Mac, or Linux® by visiting [http://www.adobe.com/go/reader\\_download](http://www.adobe.com/go/reader_download).

For more assistance with Adobe Reader visit <http://www.adobe.com/go/acrreader>.

Windows is either a registered trademark or a trademark of Microsoft Corporation in the United States and/or other countries. Mac is a trademark of Apple Inc., registered in the United States and other countries. Linux is the registered trademark of Linus Torvalds in the U.S. and other countries.



**Patient initiated questions: how can doctors encourage them and improve the consultation process? A qualitative study**

|                                                                                                                                                                                                                                                 |                                                                                                                                                                                                                                                         |
|-------------------------------------------------------------------------------------------------------------------------------------------------------------------------------------------------------------------------------------------------|---------------------------------------------------------------------------------------------------------------------------------------------------------------------------------------------------------------------------------------------------------|
| Journal:                                                                                                                                                                                                                                        | <i>BMJ Open</i>                                                                                                                                                                                                                                         |
| Manuscript ID:                                                                                                                                                                                                                                  | bmjopen-2013-003112.R1                                                                                                                                                                                                                                  |
| Article Type:                                                                                                                                                                                                                                   | Research                                                                                                                                                                                                                                                |
| Date Submitted by the Author:                                                                                                                                                                                                                   | 30-May-2013                                                                                                                                                                                                                                             |
| Complete List of Authors:                                                                                                                                                                                                                       | Murtagh, Ged; Imperial College London, Surgery and Cancer<br>Furber, Lynn; University of Leicester, Department of Cancer Studies and Molecular Medicine<br>Thomas, Anne; Leicester Royal Infirmary, Department of Cancer Studies and Molecular Medicine |
| <b>Primary Subject Heading</b>:                                                                                                                                                                                                                 | Communication                                                                                                                                                                                                                                           |
| Secondary Subject Heading:                                                                                                                                                                                                                      | Oncology                                                                                                                                                                                                                                                |
| Keywords:                                                                                                                                                                                                                                       | QUALITATIVE RESEARCH, ONCOLOGY, MEDICAL EDUCATION & TRAINING                                                                                                                                                                                            |
| <p>Note: The following files were submitted by the author for peer review, but cannot be converted to PDF. You must view these files (e.g. movies) online.</p> <p>New_patients1.3approved[1].docm<br/>Follow_up_patients1.3approved[1].docm</p> |                                                                                                                                                                                                                                                         |

SCHOLARONE™  
Manuscripts



1  
2  
3 **Patient initiated questions: how can doctors encourage them and improve the consultation**  
4 **process? A qualitative study**  
5  
6  
7

8  
9 Dr. GM Murtagh,<sup>1</sup> Dr L Furber<sup>2</sup> Dr. AL Thomas<sup>3</sup>  
10  
11

12  
13  
14  
15  
16 <sup>1</sup> Senior Lecturer in Clinical Communication, Division of Surgery, Department of Surgery and  
17 Cancer, St Mary's Campus, Imperial College London, South Wharf Road, London W2 1BL  
18 [g.murtagh@imperial.ac.uk](mailto:g.murtagh@imperial.ac.uk)  
19  
20  
21

22  
23 <sup>2</sup> Senior Nurse Researcher, Department of Cancer Studies and Molecular Medicine  
24 Robert Knighton Clinical Sciences Building, University of Leicester, Leicester Royal Infirmary,  
25 Leicester LE2 7LX  
26  
27  
28

29  
30 <sup>3</sup> Reader and Consultant in Medical Oncology, Department of Cancer Studies and Molecular  
31 Medicine, Leicester Royal Infirmary  
32 Leicester LE 1 5WW  
33  
34  
35  
36  
37  
38

39 **Correspondence to:**  
40  
41

42 Dr. G.M. Murtagh  
43 Division of Surgery, Department of Surgery and Cancer, St Mary's Hospital,  
44 Imperial College London, South Wharf Road, London W2 1BL  
45  
46 [g.murtagh@imperial.ac.uk](mailto:g.murtagh@imperial.ac.uk)  
47  
48  
49  
50  
51  
52

53 **Manuscript word count 3,505**  
54

55 **Abstract word count: 237**  
56  
57  
58  
59  
60

## Abstract

**Objective:** To investigate the circumstances under which patients initiate direct questions in oncology consultations

**Design:** Conversation analysis of 47 consultations between oncologists and cancer patients

**Setting:** An oncology clinic at a teaching hospital in the East Midlands.

**Participants:** 16 Oncologists and 67 cancer patients

**Outcome measure:** Patient initiated direct questions

**Results:** On the whole patients' direct questions are designed to seek specific information regarding, the cancer itself, treatment options or their experience of symptoms. When patients do ask direct questions they typically follow the announcement of test results where some reference to the details of those results, is provided. More specifically, there appears to be a relation between showing the patient their scan/x-ray results, patient involvement and patient initiated direct questions. Higher levels of patient initiated direct questions were clustered around occasions where doctors provided information and explanations of test results (twelve consultations) sometimes with direct reference to scan or x-ray results (seven consultations).

**Conclusions:** This study highlights the importance of careful explanation of diagnostic evidence as a factor contributing to increased patient involvement. More specifically, the findings suggest

1  
2  
3 that, when appropriate, invoking diagnostic evidence (e.g. scan or x-ray results) is an effective  
4 way of increasing levels of patient question asking. Doctors need to be able to encourage patient  
5 question asking to ensure that patients have at their disposal an important means through which  
6 they can determine their information needs. Although these results come from a study of  
7 oncology consultations, this finding may be transferable to other clinical contexts.  
8  
9  
10  
11  
12  
13  
14  
15  
16  
17  
18  
19  
20  
21  
22  
23  
24  
25  
26  
27  
28  
29  
30  
31  
32  
33  
34  
35  
36  
37  
38  
39  
40  
41  
42  
43  
44  
45  
46  
47  
48  
49  
50  
51  
52  
53  
54  
55  
56  
57  
58  
59  
60

## Article Summary

- In cancer care patient question asking can significantly influence the provision of information from the doctor.
- The paper extends the existing research into communication in cancer care by reporting on distinctive patterns of communication behaviour which influence, in this case, patient question asking.

## Key Messages

- The frequency of direct questions initiated by patients in oncology consultations is relatively low.
- Explicating test results alongside diagnostic evidence increases the chances of patient initiated direct questions in oncology consultations.
- This finding has implications for understanding how doctors can encourage patient questions within cancer care and, potentially, other clinical settings.

## Strengths and Limitations of this study

- The strength of the study is that it targets actual instances of question asking behaviour in relation to other situational variables in the consultation.

- The study is limited by its sole reliance on audio recordings of consultations.

Consequently, other aspects of social interaction, e.g. eye contact, bodily comportment etc which can also have a significant influence on the content of the consultation, have not been included.

For peer review only

## Introduction

One of the main problems oncologists face in the consultation is the difficulty of accurately gauging the patient's information needs.<sup>1,2</sup> Studies have examined patient preferences for information provision and involvement<sup>1,3,4,5</sup> and have shown, among other things, that patients do want specific information concerning their illness.<sup>4,5</sup> However, patients' information needs are not static and there can be significant variations between patients in terms of their preferences for the timing, content and detail of information they require. Such variations may change during the course of an illness and even during the course of a single consultation depending on the type of information a patient receives.<sup>1</sup> Consequently, patients' attempts to elicit information from doctors also varies. These contingencies indicate a real need to understand more about the conditions under which patients actively seek information and, more specifically, the kinds of communication behaviours patients use to seek out information. Among these behaviours, question asking is key, as it can be used as a basic form of information seeking.<sup>6</sup> When patients ask questions it allows them to shape their own levels of involvement<sup>8</sup> and handle the contingencies of information exchange.<sup>9</sup> In addition, patient question asking has been linked to improved information provision.<sup>8,10</sup> Moreover, patients who receive an answer to their question demonstrate better psychological adjustment following the consultation than those who ask questions but don't receive a response.<sup>16,17</sup>

1  
2  
3 These findings still beg the question, how and when do patients ask questions? In the context of  
4 cancer care, studies have shown that direct questions (alongside indirect cues) occur most often  
5 during the treatment phase of the consultation<sup>11</sup>; that companions who accompany patients, tend  
6 to ask more questions than patients particularly in relation to treatment and diagnosis<sup>12</sup>; that  
7 ethnic and racial differences between patients can reflect differences in levels of question asking  
8 and direct question asking<sup>13</sup>; that question prompt lists can encourage patient question asking  
9 particularly in relation to prognosis and diagnosis.<sup>14,15</sup>  
10  
11  
12  
13  
14  
15  
16  
17  
18  
19

20  
21  
22  
23  
24 These studies provide valuable direction in understanding some of the factors behind patient  
25 question asking in cancer care. However, there is still a lot that is unknown about the specific  
26 situational variables which underpin and shape patient question asking in relation to the doctor's  
27 communication behaviours. The extent to which patients initiate information seeking, in the first  
28 place, is often contingent on the doctor's communicative style. The import of this lies in the fact  
29 that when patients seek information (e.g. through asking questions), doctors typically respond in  
30 more informative and accommodative ways,<sup>18</sup> simply because patient questions are one of the  
31 ways in which patients establish their information needs. The purpose of this study was to  
32 capture the interactional and situational variables that occur alongside patient initiated questions  
33 to establish how and when patients are more inclined to initiate direct questions.  
34  
35  
36  
37  
38  
39  
40  
41  
42  
43  
44  
45  
46  
47  
48  
49  
50  
51  
52  
53  
54  
55  
56  
57  
58  
59  
60

## Methods

The study was carried out in a large UK Cancer Centre. LF recruited patients (with different types of cancers) attending the oncology department (n=77) as well as a mix of oncology consultants and specialist registrars. Both newly diagnosed and follow up patients were recruited to ensure maximum variability in our sample group. Following each consultation patients were invited to complete a satisfaction questionnaire and interviews were conducted with the patients by LF shortly after their consultation. Patient consent was obtained before their consultation was recorded and before collecting questionnaire data.

We audio recorded 47 consultations which were then transcribed and analysed using conversation analysis.<sup>22</sup> 30 of those 47 consultations were selected for closer inspection as they demonstrated the strongest variation in delivery style and patient response. The paper reports on a sample from that selection of 30. Transcription and analysis was carried out by GM. Subsequent analyses were carried out by GM, AT and LF. Any disagreements regarding interpretation of the data were resolved through discussion and by revisiting the data. This paper reports on a sample from these consultations which were most strongly indicative of a general pattern between the doctor's communicative style and patient initiated direct questions. Inclusion Criteria: Patients over the age of eighteen, having been diagnosed with cancer, aware of their diagnosis and willing to participate in the study. Exclusion criteria: Any patient unable to consent for themselves, patients with a cognitive impairment and patients who do not speak fluent English.



## Analysis

This analysis involved examining the turn-by-turn construction of utterances between doctor and patient. This allowed us to identify the occasions where patients ask questions as well as the type of question e.g. if the question followed a prompt from the doctor or not. It also enabled us to target the link between the different ways in which test results were delivered and levels of patient initiated questions. For the purposes of analysis we defined a direct question as that which is initiated solely by the patient, without a verbal prompt from the doctor and which targets a specific topic.

Audio recordings of the oncology consultations were subjected to repeated listening and were then transcribed and analysed using conversation analysis, a method of analysis which details characteristics of speech exchange including pauses, pace and intonation etc (the transcription symbols used to indicate these characteristics are provided in table 1). The consultations were examined with a view to identifying some of the systematic and recurrent properties of patient question asking to see if that would provide further direction in improving consultation practice. Analysis with this level of detail allowed us to unpack the exchanges and to identify typical as well as variable features of doctor and patient talk. For example, we started to notice how variations in the delivery format of test results can shape the patient's response and more specifically influence their levels of question asking.

### Transcription symbols

- ◦      Talk marked by the degree sound indicates words that are softly spoken
- (.)      A full stop in brackets indicates a micro pause
- (1.0), (0.5)      indicates silence in seconds and tenths of seconds
- [Okay
- [Yes      Talk which is preceded by a square bracket indicates overlap in speech between two different speakers
- =      Talk marked with the equals sign at the end of one line and the beginning of another indicates no pause between the end of one utterance and the start of another

### Results

Our focussed sample of 30 consultations in total came to 451.30 mins, just over 7.5 hours of consultation time with the average length of the consultation at 15.04 mins. In 7 out of the 30 consultations (just under 60 mins of consultation time) the patients did not ask any questions. In the remaining 23 consultations there were 76 instances of patients asking questions (avg. 2.5 direct patient questions per consultation). However patients' questions arose in different ways. For example, in 5 out of those 23 consultations (22%) patients' questions came at the end (within 3-4 mins of the end of the consultation) again following a prompt from the doctor. In 6 out of the 23 consultations (26%) there is evidence of indirect or embedded questions arising at different

1  
2  
3 junctures of the consultation following a prompt from the doctor. In 12 of the 23 consultations,  
4  
5 (52%) patient initiated direct questions occur specifically in relation to discussion of test results.  
6  
7  
8 In 7 of these 12 consultations (58%) patient initiated question asking occurs following a careful  
9  
10 explanation of test results and diagnostic evidence e.g. the doctor's use of scan or x-rays. In only  
11  
12 two consultations did the patient decline to ask a question following an invitation to do so from  
13  
14 the doctor.  
15  
16  
17  
18  
19

20 We noted a number of variations in the way in which doctors deliver test results. Our main  
21  
22 finding, however, is that patients are more inclined to initiate direct questions when doctors  
23  
24 deliver results with direct reference to the diagnostic evidence e.g. x-rays or scans. To exemplify  
25  
26 this we identified two types of information delivery each resulting in different types of patient  
27  
28 response, the most marked difference being levels of patient initiated question asking. In delivery  
29  
30 type 1, test results were delivered in a very general way without elaboration (**Restricted delivery**  
31  
32 - e.g. 'your scan results are fine'). With this type of delivery patient initiated questions were  
33  
34 absent or minimal. In delivery type 2 (**Elaborate delivery** - 'your scan shows that...') the doctor  
35  
36 elaborated or explained the test results sometimes invoking the scan or the x-ray to do so. This  
37  
38 type of delivery typically positively influenced levels of patient involvement in the consultation  
39  
40 and prompted more patient initiated direct questions and consequently more information  
41  
42 provision from the doctor.  
43  
44  
45  
46  
47  
48  
49  
50  
51  
52  
53  
54  
55  
56  
57  
58  
59  
60

## Restricted delivery

**Table 1**

### 0 patient initiated questions

1. Doctor: The CT scan result is here (0.5) and that was
2. basically normal erm nothing to suggest any new no new
3. glands you have got some changes on your erm (4.0) lungs
4. from(.) previous radiotherapy (0.5)uhm (1.5) so that's your
5. CT scan and I'm just trying to find the (0.5) lung function
6. tests(.) when did you have those done
7. Patient: (2.0) had them done
8. Husband: Two weeks ago

**Table 2**

### 0 initiated patient questions

1. Doctor: Okay (.) um (0.5) scan result was fine
2. Patient: Good
3. Doctor: Good okay an everything's stable on the in the
4. bones
5. Patient: Right

**Table 3****0 patient questions**

1. Doctor: Your scan shows everything is the same
2. Patient: Good
3. Doctor: So that's very good

**Table 4****1 patient initiated question**

1. Doctor: And you've had an echocardiogram of your heart an
2. that's all fine
3. Patient: Is it [okay
4. Doctor: [you had that done on?
5. Patient: °Last Friday°
6. Doctor: Last Friday that's all fine (.) no problems so
7. that's good news could I er examine you

The sequences in tables 1-4 show the announcement of diagnostic results depicting the type 1 delivery. In each case the results are delivered in a general, non-specific way characterised by a general clinical assessment, 'fine', 'normal' or 'no change'. In each case this type of delivery

1  
2  
3 produces a minimal response from the patient. It seems that this is partly to do with the fact that  
4  
5 the general delivery projects a paternalistic approach where the doctor presents his/her  
6  
7 interpretation of the results as the authoritative one, without any specific reference to further  
8  
9 details of the findings.<sup>21</sup> Consequently, the patient is invited to accept the diagnostic judgement  
10  
11 of the doctor and the general, non-specific explanation of the results is reflected in the general,  
12  
13 non-specific response provided by the patient.<sup>19</sup> In almost a third of the sample, apart from the  
14  
15 sequence in table 4, the patient does not question or inquire further into the results following the  
16  
17 type 1 delivery. In table 4 the patient does ask a question, but again this is presented in a general  
18  
19 form 'is it okay?' again reflecting the general way in which the results of the echocardiogram is  
20  
21 presented. However, later on following a physical examination the patient targets back on this  
22  
23 assessment, after a physical examination, following a prompt from the doctor.  
24  
25  
26  
27  
28  
29  
30

- 31  
32
- 33 1. Doctor: Is there anything you wanted to ask at all?
  - 34 2. Patient: I did want to ask about my heart function
  - 35 3. Doctor: Ya sure
  - 36 4. Patient: I know you said the echocardiograms are oka:y
  - 37 5. Doctor: Yes
  - 38 6. Patient: but has it (.) erm deteriorated at all[through
  - 39 7. Doctor: [no no
- 40  
41  
42  
43  
44  
45  
46  
47  
48  
49  
50  
51  
52  
53  
54  
55  
56  
57  
58  
59  
60

**Elaborate delivery****Table 1****1 patient initiated question**

1. Doctor: The head scan, the CT and the MRI show that there
2. is something in the bones but what is unusual is that it
3. seems to be more on the right hand side than the left and I
4. think it was the left eye you were having problems with?
5. Patient: (0.5) Don't they cross?
6. Doctor: Well sometimes if it's more of a visual problem
7. they do cross yeah

In this sequence there are two distinctive features which appear to shape the patient's response. Firstly, the doctor delivers the findings from the scan and produces an expression of uncertainty regarding which eye the patient was having problems with. Secondly, there is a half second pause following the delivery which not only provides the patient with the opportunity to respond but also scope to negotiate the nature of that response.

**Table 2****5 patient initiated questions**

1. Doctor: Your scan shows that things are very much the
2. same, maybe slightly bigger but literally by 4mm both in

1  
2  
3 3. the chest and in the bowel  
4

5 4. Patient: Is it possible for me to see the scan?  
6

7 5. Doctor: Yes, these are your lungs, that's your heart  
8

9 6. Patient: Where's the tumor?  
10

11 7. Doctor: That's it  
12

13 8. Patient: It's there? So when I saw it previously it was  
14

15 9. about that size?  
16

17 10. Doctor: It's only a couple of centimetres most  
18

19 11. Patient: As small as that? In fact it's smaller  
20

21 12. than when I first came about walnut size  
22

23 13. Doctor: It doesn't really say how big it was  
24

25 14. initially  
26

27 15. Patient: So it would be about like that wouldn't it?  
28

29 16. Doctor: Yeah  
30

31 17. Patient: It was on the lymph gland, is that the lymph  
32

33 18. gland?  
34

35 19. Doctor: No that's your bowel that's the tumor and  
36

37 20. that's your bowel there and that's your aneurism  
38

39 21. they've measured it for you 55 mm  
40  
41  
42  
43  
44  
45  
46  
47  
48  
49  
50

51 In this sequence the results are delivered and carefully explicated with the inclusion of numerical  
52 data specifying the size of the cancerous growth (lines 1-3). This provides the patient with a  
53 precise frame of reference regarding the cancer. Interestingly in this case the patient, in response,  
54  
55  
56  
57  
58  
59  
60



1  
2  
3 asks to see the scan (line 4). The doctor then identifies the patient's lungs and heart providing the  
4  
5 relevance for the proximal distance of the tumour from the lungs and heart. The patient (line 6)  
6  
7  
8 then asks about the location of the tumour, its size (lines 8-9, 11) and finally asks about the  
9  
10 lymph gland (line 17-18).  
11  
12  
13  
14  
15

16  
17 **Table 3**

18  
19 **2 patient initiated questions**

- 20  
21  
22 1. Doctor: The scan is very much the same erm there hasn't  
23  
24 2. been um any obvious problems there is quite a lot of  
25  
26 3. fibrosis still but that's to be expected so fibrosis is  
27  
28 4. healing and scarring  
29  
30 5. Patient: Where's that?  
31  
32 6. Doctor: Umm both in the air in the central areas you know  
33  
34 7. where all the problems originally were with the  
35  
36 8. swallowing so in the central area and in the tummy um (2.0)  
37  
38 9. °let me tell you exactly°  
39  
40  
41 10. Patient: Was that there before?  
42  
43 11. Doctor: They've said there's an increase in the volum  
44  
45 12. of that fibrosis  
46  
47 13. Patient: So basically that's scar tissue, is that what  
48  
49 14. you're saying?  
50  
51  
52  
53  
54  
55  
56  
57  
58  
59  
60

1  
2  
3 This delivery of diagnostic news starts out almost as a type 1 delivery ('The scan is very much  
4 the same') but then goes on to point out that fibrosis is still present which is 'to be expected'.  
5  
6

7  
8 The doctor then explains the term fibrosis and the patient responds (line 5) by asking where it is.  
9

10 When the doctor explains the location of the fibrosis, the patient asks if it was present before.  
11

12 The doctor then refers to the report regarding the increase in fibrosis and the patient (line 13)  
13 then presents a gloss of the meaning of the news which is posed as a question.  
14  
15  
16  
17

#### 18 **Table 4**

##### 19 **5 patient initiated questions**

- |    |                                                               |
|----|---------------------------------------------------------------|
| 20 |                                                               |
| 21 |                                                               |
| 22 |                                                               |
| 23 |                                                               |
| 24 |                                                               |
| 25 | 1. Doctor: So they've reported it as stable disease basically |
| 26 | 2. nothing new to find there are some lymph nodes in your     |
| 27 | 3. pelvis but there's nothing different from that             |
| 28 | 4. Patient: Just where exactly?                               |
| 29 | 5. Doctor: Did you want to look at your scan you [can         |
| 30 | 6. Patient: [Will I be                                        |
| 31 | 7. able to tell from that?                                    |
| 32 | 8. Doctor: Well we can look at it together                    |
| 33 | 9. Patient: Yeah                                              |
| 34 | 10. Doctor: (3.0) So this is your pelvis                      |
| 35 | 11. Patient: Right                                            |
| 36 | 12. Doctor: This is your right hip and that is your left      |
| 37 | 13. hip=                                                      |
| 38 | 14. Patient: =Mhm                                             |
| 39 |                                                               |
| 40 |                                                               |
| 41 |                                                               |
| 42 |                                                               |
| 43 |                                                               |
| 44 |                                                               |
| 45 |                                                               |
| 46 |                                                               |
| 47 |                                                               |
| 48 |                                                               |
| 49 |                                                               |
| 50 |                                                               |
| 51 |                                                               |
| 52 |                                                               |
| 53 |                                                               |
| 54 |                                                               |
| 55 |                                                               |
| 56 |                                                               |
| 57 |                                                               |
| 58 |                                                               |
| 59 |                                                               |
| 60 |                                                               |

1  
2  
3  
4  
5  
6  
7  
8  
9  
10  
11  
12  
13  
14  
15  
16  
17  
18  
19  
20  
21  
22  
23  
24  
25  
26  
27  
28  
29  
30  
31  
32  
33  
34  
35  
36  
37  
38  
39  
40  
41  
42  
43  
44  
45  
46  
47  
48  
49  
50  
51  
52  
53  
54  
55  
56  
57  
58  
59  
60

15. Doctor: And then you've got some lymph nodes that are  
16. predominantly on the on the right hand side  
17. Patient: Yes right so the other side is what they  
18. should look like is it?  
19. Doctor: Yeah you've got some tiny lymph nodes there  
20. they're normally a centimeter and a half is as big as  
21. you'd expect them to be normally  
22. Patient: Right  
23. Doctor: You have got some higher up as well  
24. Patient: So that's more into the tummy?  
25. Doctor: Yeah  
26. Patient: Dya think it is possible that thee enlarged  
27. (.) lymph nodes could be (0.5) pressing on a ne::rve  
28. [or  
29. Doctor: [Sometimes they can do ya ya

The diagnostic news in this delivery specifies the fact that there 'are some lymph nodes'. In response the patient asks 'where' exactly' (line 6). The doctor then asks the patient if they would like to look at their scan. Interestingly the patient's next question ('will I be able to tell from that?') at line 7 manifests the knowledge-competence gap between doctors and patients. This may partly account for why doctors do not always invite patients to look at scan/x-ray results and why patients do not always ask to see them when they are available. The doctor's response ('we can look at it together') bridges this gap by inviting the patient to examine the scan jointly

1  
2  
3 allowing the doctor to identify, for the patient, key anatomical structures whilst also allowing the  
4  
5 patient to inquire further.  
6  
7  
8  
9

10  
11 The sequences in tables 1-4 show the announcement of diagnostic results depicting the type 2  
12  
13 delivery. In these sequences the results are delivered alongside a clinical assessment which either  
14  
15 includes a numerical reading or further explication of the findings. When results are delivered in  
16  
17 this way, patients tend to engage with the doctor. An important consequence of this is higher  
18  
19 levels of patient involvement including more patient initiated questions.  
20  
21  
22  
23  
24  
25  
26

## 27 Discussion

28  
29  
30  
31  
32  
33

34 In the main, consultations covered topics such as treatment, the progression of the cancer itself  
35  
36 and the symptoms experienced by the patient. Not all topics were addressed in every consultation  
37  
38 and doctors varied in how they dealt with each topic. We found that generally patients' actual  
39  
40 levels of involvement in the consultation were relatively low and patients varied in how active  
41  
42 they were in seeking information. We also found that, on the whole, patients seemed disinclined  
43  
44 to ask questions or show communication behaviours designed to elicit information. This finding  
45  
46 is consistent with much earlier research into this topic.<sup>6,17</sup>  
47  
48  
49  
50  
51  
52

53 In relation to discussions of test results between doctor and patient, the data appear to indicate  
54  
55 that there may be a connection between the way in which the results are delivered and the  
56  
57 occurrence of patient initiated direct questions. That is to say, the plainer announcement of  
58  
59  
60

1  
2  
3 diagnostic results ('your scan is fine' - Type 1), which does not include sharing the diagnostic  
4  
5 evidence projects a more paternalistic approach implicit in which, the patient is expected to  
6  
7 accept the diagnostic judgement of the doctor. It is also characterised by a general explanation of  
8  
9 the results which is reflected in the general response provided by the patient.<sup>19</sup> In contrast the  
10  
11 Type 2 delivery is much more accommodative of patient input. Moreover, the invocation of the  
12  
13 scan or the x-ray, where appropriate, appears to be significant in encouraging patient  
14  
15 involvement and consequently patient initiated direct questions. Incorporating and explaining the  
16  
17 evidence appears to be interpreted by patients as an opportunity to contribute to the consultation  
18  
19 and establish their information needs in an environment within which the patient's  
20  
21 queries/opinions are welcomed. Unless the patient has specifically requested not to see scans or  
22  
23 x-rays, this would appear to be an effective way of encouraging patient involvement generally  
24  
25 and increasing levels of patient question asking. Consequently, patients are then able to establish  
26  
27 and satisfy their information needs in a timely and effective way.  
28  
29  
30  
31  
32  
33  
34  
35

36 In cases where patients did ask more questions, there was no significant increase in consultation  
37  
38 length and no patient refused the offer of looking at examination results. The examples presented  
39  
40 above were carefully selected because they display the most marked variation in consultation  
41  
42 style highlighting clear contrasts between the two types of delivery.  
43  
44  
45  
46  
47

48 A number of different types of intervention have been used in cancer care to help facilitate  
49  
50 patient involvement. For example, question prompt lists have been used quite widely, but their  
51  
52 actual implementation in consultations is not always straightforward and their rates of success do  
53  
54 vary.<sup>15</sup> Moreover, we found in our study, that even when patients entered the consultation with  
55  
56  
57  
58  
59  
60

1  
2  
3 question lists, they often left the consultation without having asked the questions they came  
4  
5 prepared for.  
6  
7

8  
9  
10 The finding that when the doctor elaborates or explicates findings from the evidence, this can  
11  
12 increase levels of patient involvement has been identified previously in a study of primary care  
13  
14 consultations.<sup>20</sup> Clearly there are important differences between an oncology consultation and a  
15  
16 primary care consultation. However, in relation to consulting behaviours, in both settings there  
17  
18 appear to be striking similarities. That is to say, careful explication of diagnostic findings can  
19  
20 encourage patient involvement such as, in this case, question asking, which in turn can enable  
21  
22 patients to establish their information needs. Further research in this area demands a closer  
23  
24 investigation of what Frankel<sup>9</sup> has described as the ‘presuppositional grounds upon which the  
25  
26 communication situation itself rests’. This would then allow us to identify other consulting  
27  
28 behaviours doctors can utilise to encourage patient involvement.  
29  
30  
31  
32  
33  
34  
35

36 There may be a number of reasons why patients are disinclined to ask questions following the  
37  
38 ‘your scan result is fine’ type of announcement. The minimal responses identified may not  
39  
40 actually be conditioned solely by the type of announcement of test results but may also be a  
41  
42 consequence of patient preference or information needs at that particular moment. As noted, in  
43  
44 Type 1, table 4 the patient targets back on a general assessment of the echocardiogram as ‘okay’.  
45  
46  
47 This clearly merits further empirical investigation.  
48  
49  
50  
51  
52  
53  
54  
55  
56  
57  
58  
59  
60

## Conclusion

1  
2  
3  
4  
5  
6  
7  
8  
9 Currently there is good research evidence indicating that patient initiated question asking should  
10 be encouraged. Doctors need to be able to encourage patient question asking to ensure that  
11 patients have at their disposal an important means through which they can determine and express  
12 their information needs. This study confirms the findings from previous studies showing that  
13 levels of patient initiated questions in Oncology are relatively low. Our study suggests that  
14 patient initiated question asking can be encouraged through timely and deliberate information  
15 giving which incorporates an explanation and display of test results. The findings at this stage are  
16 only suggestive and further exploration is required to establish their actual significance. Studies  
17 which involve closer examination of the actual interactional episodes between doctors and  
18 patients are required to provide a deeper understanding of patient initiated questions and the  
19 situational variables which may influence them.  
20  
21  
22  
23  
24  
25  
26  
27  
28  
29  
30  
31  
32  
33  
34  
35  
36  
37  
38  
39  
40  
41  
42  
43  
44  
45  
46  
47  
48  
49  
50  
51  
52  
53  
54  
55  
56  
57  
58  
59  
60

## References

1. Butow P.N., Maclean M, Dunn S.M., Tattersall M.H.N., Boyer M.J. The dynamics of change: Cancer patients' preferences for information, involvement and support. *Annals of Oncology* 1997; 8: 857-863.
2. Gattellari M, Butow P.N., Tattersall M.H.N. Sharing decisions in cancer care. *Social Science and Medicine* 2001; 52: 1865-1878.
3. Leydon G.M., Boulton M, Moynihan C, Jones A, Mossman J, Boudioni M, et al. Cancer patients' information needs and information seeking behaviour: in-depth interview study. *BMJ* 2000; 320: 909-913.
4. Jenkins V., Fallowfield L., Saul J. Information needs of patients with cancer: results from a large study in UK cancer centres. *British Journal of Cancer* 2001; 84: 48-51.
5. Cox A., Jenkins V., Catt S., Langridge C., and Fallowfield L. Information needs and experiences: An audit of UK cancer patients. *European Journal of Oncology Nursing*. 2006; Vol. 10 Issue 4 263-272.
6. Beisecker A.E. and Beisecker T.D. Patient information seeking behaviours when communicating with doctors. *Medical Care*. 1990; Vol. 28, No. 1: 19-28
7. Cegala D, Marinelli T and Post D. The effect of patient communication skills training on compliance. *Archives of Family Medicine*. 2000; 9: 957-964.
8. Street R.L. and Millay B. Analysing patient participation in medical encounters. *Health Communication*. 2001; Vol. 13, Issue 1: 61-73



- 1  
2  
3 9. Frankel R, Talking in interviews: a dispreference for patient initiated questions in  
4  
5 physician-patient encounters. In Psathas G, (ed.) Interaction Competence. Lanham, MD:  
6  
7 University Press of America, 1990: 231-261  
8  
9
- 10  
11 10. Cegala D, Street R.L., and Clinch R.C. The impact of patient participation on physicians'  
12  
13 information provision during a primary care medical interview. Health Communication,  
14  
15 2007; Vol. 21, Issue 2: 177-185.  
16
- 17  
18 11. Butow P.N. et al. Oncologists reactions to cancer patients' verbal cues. Psycho-oncology.  
19  
20 Vol. 11, Issue 1 2002; 47-58.  
21
- 22  
23 12. Eggly S. et al. Information seeking during "bad news" oncology interactions: Question  
24  
25 asking by patients and their companions. Social Science and Medicine, 2006; 63: 2974-  
26  
27 2985.  
28
- 29  
30 13. Eggly S. et al. Variation in question asking during cancer clinical interactions: A  
31  
32 potential source of disparities in access to information. Patient Education and  
33  
34 Counselling, 2011; Vol. 82, Issue 1: 63-68.  
35
- 36  
37 14. Brown R, Butow PN, Boyer MJ and Tattersall MHN. Promoting patient participation in  
38  
39 the cancer consultation: evaluation of a prompt sheet and coaching in question asking.  
40  
41 British Journal of Cancer 1999; Vol. 80: 242-248  
42
- 43  
44 15. Dimoska A, Tattersall M.H.N, Butow PN, Shepherd H. Can a "prompt list" empower  
45  
46 cancer patients to ask relevant questions. Cancer 2008; Vol. 113, Issue 2: 225-237.  
47
- 48  
49 16. Butow PN, Dunn SM, Tattersall MHN, and Jones QJ. Computer-based interaction  
50  
51 analysis of the cancer consultation. British Journal of Cancer 1995; Vol. 71: 1115-1121.  
52  
53  
54  
55  
56  
57  
58  
59  
60

- 1  
2  
3  
4  
5  
6  
7  
8  
9  
10  
11  
12  
13  
14  
15  
16  
17  
18  
19  
20  
21  
22  
23  
24  
25  
26  
27  
28  
29  
30  
31  
32  
33  
34  
35  
36  
37  
38  
39  
40  
41  
42  
43  
44  
45  
46  
47  
48  
49  
50  
51  
52  
53  
54  
55  
56  
57  
58  
59  
60
17. Street RL Information giving in medical consultations: The influence of patients' communicative styles and personal characteristics. *Social Science and Medicine* 1991; Vol 32. Issue 5: 541-548.
  18. Street RL, Gordon HS, Ward MM, Krupat E, Kravitz RL. Patient participation in medical consultations: Why some patients are more involved than others. *Medical Care* 2005; Vol 43, No. 10: 960-969.
  19. Collins S, Drew P, Watt I, and Entwistle V. 'Unilateral' and 'bilateral' practitioner approaches in decision-making about treatment. *Social Science and Medicine* 2005; 61: 2611-2627.
  20. Perakyla A, Communicating and responding to diagnosis in Heritage J, and Maynard D. (eds.) *Communication in Medical Care*. 2006: 214-247.
  21. Pomerantz A, and E. Sean Rintel. Practices for reporting and responding to test results during medical consultations: enacting the roles of paternalism and independent expertise. *Discourse Studies* 2004; Vol. 6 (1): 9-26.
  22. Heritage J, and Maynard D. *Communication in Medical Care: Interaction between Primary Care Physicians and Patients*. 2006. Cambridge: Cambridge University Press.

### Copyright/licence for publication

“The Corresponding Author has the right to grant on behalf of all authors and does grant on behalf of all authors, a [worldwide licence](#) to the Publishers and its licensees in perpetuity, in all forms, formats and media (whether known now or created in the future), to i) publish, reproduce, distribute, display and store the Contribution, ii) translate the Contribution into other languages, create adaptations, reprints, include within collections and create summaries, extracts and/or, abstracts of the Contribution, iii) create any other derivative work(s) based on the Contribution, iv) to exploit all subsidiary rights in the Contribution, v) the inclusion of electronic links from the Contribution to third party material where-ever it may be located; and, vi) licence any third party to do any or all of the above.”

### Competing interests

All authors have completed the ICMJE uniform disclosure form at [www.icmje.org/coi\\_disclosure.pdf](http://www.icmje.org/coi_disclosure.pdf) (available on request from the corresponding author) and declare: no support from any organisation for the submitted work; no financial relationships with any organisations that might have an interest in the submitted work in the previous three years; no other relationships or activities that could appear to have influenced the submitted work."

### Contributorship statement

All authors contributed to the research study. As PI AT led the study design with contributions from GM and LF. GM and LF led the data collection and analysis with contributions from AT. The first draft of the paper was prepared by GM and then subsequently all authors contributed to data interpretation and revisions to the manuscript. All authors had full access to the data derived from the study and can take full responsibility for the integrity of the data and the accuracy of the data analysis.

### Data sharing

There is no additional data available

### Ethics approval

This paper is an outcome from a study funded by the NIHR Research for Patient Benefit Programme. The funding body did not partake in the design of the study, collection, analysis and interpretation of data, writing and submission of the article for publication. The study received ethical approval from the Nottingham research ethics committee 2 ID: 09/H0408/34. All participants in the study gave informed consent before taking part. All authors are independent

1  
2  
3 from the funding body. Each had had full access to all of the data in the study and can take  
4 responsibility for the integrity of the data and the accuracy of the data analysis  
5  
6

7 This paper presents independent research funded by the National Institute for Health Research  
8 (NIHR) under its Research for Patient Benefit (RfPB) Programme (Grant Reference Number PB-  
9 PG-0807-14122). The views expressed are those of the author(s) and not necessarily those of the  
10 NHS, the NIHR or the Department of Health.  
11  
12  
13  
14  
15  
16  
17  
18  
19  
20  
21  
22  
23  
24  
25  
26  
27  
28  
29  
30  
31  
32  
33  
34  
35  
36  
37  
38  
39  
40  
41  
42  
43  
44  
45  
46  
47  
48  
49  
50  
51  
52  
53  
54  
55  
56  
57  
58  
59  
60

For peer review only

1  
2  
3 **Patient initiated questions: how can doctors encourage them and improve the consultation**  
4 **process? A qualitative study**  
5  
6  
7

8  
9 Dr. GM Murtagh,<sup>1</sup> Dr L Furber<sup>2</sup> Dr. AL Thomas<sup>3</sup>  
10  
11

12  
13  
14  
15  
16 <sup>1</sup> Senior Lecturer in Clinical Communication, Division of Surgery, Department of Surgery and  
17 Cancer, St Mary's Campus, Imperial College London, South Wharf Road, London W2 1BL  
18 [g.murtagh@imperial.ac.uk](mailto:g.murtagh@imperial.ac.uk)  
19  
20  
21

22  
23 <sup>2</sup> Senior Nurse Researcher, Department of Cancer Studies and Molecular Medicine  
24 Robert Knighton Clinical Sciences Building, University of Leicester, Leicester Royal Infirmary,  
25 Leicester LE2 7LX  
26  
27  
28

29  
30 <sup>3</sup> Reader and Consultant in Medical Oncology, Department of Cancer Studies and Molecular  
31 Medicine, Leicester Royal Infirmary  
32 Leicester LE 1 5WW  
33  
34  
35  
36  
37  
38

39 **Correspondence to:**  
40  
41

42 Dr. G.M. Murtagh  
43 Division of Surgery, Department of Surgery and Cancer, St Mary's Hospital,  
44 Imperial College London, South Wharf Road, London W2 1BL  
45  
46 [g.murtagh@imperial.ac.uk](mailto:g.murtagh@imperial.ac.uk)  
47  
48  
49  
50  
51  
52

53 **Manuscript word count 3,505**  
54

55 **Abstract word count: 237**  
56  
57  
58  
59  
60

## Abstract

**Objective:** To investigate the circumstances under which patients initiate direct questions in oncology consultations

**Design:** Conversation analysis of 47 consultations between oncologists and cancer patients

**Setting:** An oncology clinic at a teaching hospital in the East Midlands.

**Participants:** 16 Oncologists and 67 cancer patients

**Outcome measure:** Patient initiated direct questions

**Results:** On the whole patients' direct questions are designed to seek specific information regarding, the cancer itself, treatment options or their experience of symptoms. When patients do ask direct questions they typically follow the announcement of test results where some reference to the details of those results, is provided. More specifically, there appears to be a relation between showing the patient their scan/x-ray results, patient involvement and patient initiated direct questions. Higher levels of patient initiated direct questions were clustered around occasions where doctors provided information and explanations of test results (twelve consultations) sometimes with direct reference to scan or x-ray results (seven consultations).

**Conclusions:** This study highlights the importance of careful explanation of diagnostic evidence as a factor contributing to increased patient involvement. More specifically, the findings suggest

1  
2  
3 that, when appropriate, invoking diagnostic evidence (e.g. scan or x-ray results) is an effective  
4 way of increasing levels of patient question asking. Doctors need to be able to encourage patient  
5 question asking to ensure that patients have at their disposal an important means through which  
6 they can determine their information needs. Although these results come from a study of  
7 oncology consultations, this finding may be transferable to other clinical contexts.  
8  
9  
10  
11  
12  
13  
14  
15  
16  
17  
18  
19  
20  
21  
22  
23  
24  
25  
26  
27  
28  
29  
30  
31  
32  
33  
34  
35  
36  
37  
38  
39  
40  
41  
42  
43  
44  
45  
46  
47  
48  
49  
50  
51  
52  
53  
54  
55  
56  
57  
58  
59  
60

## Article Summary

- In cancer care patient question asking can significantly influence the provision of information from the doctor.
- The paper extends the existing research into communication in cancer care by reporting on distinctive patterns of communication behaviour which influence, in this case, patient question asking.

## Key Messages

- The frequency of direct questions initiated by patients in oncology consultations is relatively low.
- Explicating test results alongside diagnostic evidence increases the chances of patient initiated direct questions in oncology consultations.
- This finding has implications for understanding how doctors can encourage patient questions within cancer care and, potentially, other clinical settings.

## Strengths and Limitations of this study

- The strength of the study is that it targets actual instances of question asking behaviour in relation to other situational variables in the consultation.



- The study is limited by its sole reliance on audio recordings of consultations.

Consequently, other aspects of social interaction, e.g. eye contact, bodily comportment etc which can also have a significant influence on the content of the consultation, have not been included.

For peer review only

## Introduction

One of the main problems oncologists face in the consultation is the difficulty of accurately gauging the patient's information needs.<sup>1,2</sup> Studies have examined patient preferences for information provision and involvement<sup>1,3,4,5</sup> and have shown, among other things, that patients do want specific information concerning their illness.<sup>4,5</sup> However, patients' information needs are not static and there can be significant variations between patients in terms of their preferences for the timing, content and detail of information they require. Such variations may change during the course of an illness and even during the course of a single consultation depending on the type of information a patient receives.<sup>1</sup> Consequently, patients' attempts to elicit information from doctors also varies. These contingencies indicate a real need to understand more about the conditions under which patients actively seek information and, more specifically, the kinds of communication behaviours patients use to seek out information. Among these behaviours, question asking is key, as it can be used as a basic form of information seeking.<sup>6</sup> When patients ask questions it allows them to shape their own levels of involvement<sup>8</sup> and handle the contingencies of information exchange.<sup>9</sup> In addition, patient question asking has been linked to improved information provision.<sup>8,10</sup> Moreover, patients who receive an answer to their question demonstrate better psychological adjustment following the consultation than those who ask questions but don't receive a response.<sup>16,17</sup>

1  
2  
3 These findings still beg the question, how and when do patients ask questions? In the context of  
4 cancer care, studies have shown that direct questions (alongside indirect cues) occur most often  
5 during the treatment phase of the consultation<sup>11</sup>; that companions who accompany patients, tend  
6 to ask more questions than patients particularly in relation to treatment and diagnosis<sup>12</sup>; that  
7 ethnic and racial differences between patients can reflect differences in levels of question asking  
8 and direct question asking<sup>13</sup>; that question prompt lists can encourage patient question asking  
9 particularly in relation to prognosis and diagnosis.<sup>14,15</sup>  
10  
11  
12  
13  
14  
15  
16  
17  
18  
19

20  
21  
22  
23  
24 These studies provide valuable direction in understanding some of the factors behind patient  
25 question asking in cancer care. However, there is still a lot that is unknown about the specific  
26 situational variables which underpin and shape patient question asking in relation to the doctor's  
27 communication behaviours. The extent to which patients initiate information seeking, in the first  
28 place, is often contingent on the doctor's communicative style. The import of this lies in the fact  
29 that when patients seek information (e.g. through asking questions), doctors typically respond in  
30 more informative and accommodative ways,<sup>18</sup> simply because patient questions are one of the  
31 ways in which patients establish their information needs. The purpose of this study was to  
32 capture the interactional and situational variables that occur alongside patient initiated questions  
33 to establish how and when patients are more inclined to initiate direct questions.  
34  
35  
36  
37  
38  
39  
40  
41  
42  
43  
44  
45  
46  
47  
48  
49  
50  
51  
52  
53  
54  
55  
56  
57  
58  
59  
60

## Methods

The study was carried out in a large UK Cancer Centre. LF recruited patients (with different types of cancers) attending the oncology department (n=77) as well as a mix of oncology consultants and specialist registrars. Both newly diagnosed and follow up patients were recruited to ensure maximum variability in our sample group. Following each consultation patients were invited to complete a satisfaction questionnaire and interviews were conducted with the patients by LF shortly after their consultation. **Patient consent was obtained before their consultation was recorded and before collecting questionnaire data.**

We audio recorded 47 consultations which were then transcribed and analysed using conversation analysis.<sup>22</sup> 30 of those 47 consultations were selected for closer inspection as they demonstrated the strongest variation in delivery style and patient response. The paper reports on a sample from that selection of 30. **Transcription and analysis was carried out by GM. Subsequent analyses were carried out by GM, AT and LF. Any disagreements regarding interpretation of the data were resolved through discussion and by revisiting the data. This paper reports on a sample from these consultations which were most strongly indicative of a general pattern between the doctor's communicative style and patient initiated direct questions. Inclusion Criteria: Patients over the age of eighteen, having been diagnosed with cancer, aware of their diagnosis and willing to participate in the study. Exclusion criteria: Any patient unable to consent for themselves, patients with a cognitive impairment and patients who do not speak fluent English.**

## Analysis

This analysis involved examining the turn-by-turn construction of utterances between doctor and patient. This allowed us to identify the occasions where patients ask questions as well as the type of question e.g. if the question followed a prompt from the doctor or not. It also enabled us to target the link between the different ways in which test results were delivered and levels of patient initiated questions. For the purposes of analysis we defined a direct question as that which is initiated solely by the patient, without a verbal prompt from the doctor and which targets a specific topic.

Audio recordings of the oncology consultations were subjected to repeated listening and were then transcribed and analysed using conversation analysis, a method of analysis which details characteristics of speech exchange including pauses, pace and intonation etc (the transcription symbols used to indicate these characteristics are provided in table 1). The consultations were examined with a view to identifying some of the systematic and recurrent properties of patient question asking to see if that would provide further direction in improving consultation practice. Analysis with this level of detail allowed us to unpack the exchanges and to identify typical as well as variable features of doctor and patient talk. For example, we started to notice how variations in the delivery format of test results can shape the patient's response and more specifically influence their levels of question asking.

### Transcription symbols

- ° °           Talk marked by the degree sound indicates words that are softly spoken
- (.)           A full stop in brackets indicates a micro pause
- (1.0), (0.5)   indicates silence in seconds and tenths of seconds
- [Okay
- [Yes           Talk which is preceded by a square bracket indicates overlap in speech between two different speakers
- =             Talk marked with the equals sign at the end of one line and the beginning of another indicates no pause between the end of one utterance and the start of another

### Results

Our focussed sample of 30 consultations in total came to 451.30 mins, just over 7.5 hours of consultation time with the average length of the consultation at 15.04 mins. In 7 out of the 30 consultations (just under 60 mins of consultation time) **the patients did not ask any questions.** In the remaining 23 consultations there were 76 instances of patients asking questions (avg. 2.5 direct patient questions per consultation). **However patients' questions arose in different ways. For example,** in 5 out of those 23 consultations (22%) patients' questions came at the end (within 3-4 mins of the end of the consultation) **again** following a prompt from the doctor. In 6 out of the 23 consultations (26%) there is evidence of indirect or embedded questions arising at

1  
2  
3 different junctures of the consultation following a prompt from the doctor. In 12 of the 23  
4 consultations, (52%) patient initiated direct questions occur specifically in relation to discussion  
5 of test results. In 7 of these 12 consultations (58%) patient initiated question asking occurs  
6 following a careful explanation of test results and diagnostic evidence e.g. the doctor's use of  
7 scan or x-rays. In only two consultations did the patient decline to ask a question following an  
8 invitation to do so from the doctor.  
9  
10  
11  
12  
13  
14  
15  
16  
17  
18  
19

20 We noted a number of variations in the way in which doctors deliver test results. Our main  
21 finding, however, is that patients are more inclined to initiate direct questions when doctors  
22 deliver results with direct reference to the diagnostic evidence e.g. x-rays or scans. To exemplify  
23 this we identified two types of information delivery each resulting in different types of patient  
24 response, the most marked difference being levels of patient initiated question asking. In delivery  
25 type 1, test results were delivered in a very general way without elaboration (**Restricted delivery**  
26 - e.g. 'your scan results are fine'). With this type of delivery patient initiated questions were  
27 absent or minimal. In delivery type 2 (**Elaborate delivery** - 'your scan shows that...') the doctor  
28 elaborated or explained the test results sometimes invoking the scan or the x-ray to do so. This  
29 type of delivery typically positively influenced levels of patient involvement in the consultation  
30 and prompted more patient initiated direct questions and consequently more information  
31 provision from the doctor.  
32  
33  
34  
35  
36  
37  
38  
39  
40  
41  
42  
43  
44  
45  
46  
47  
48  
49  
50  
51  
52  
53  
54  
55  
56  
57  
58  
59  
60

**Restricted delivery****Table 1****0 patient initiated questions**

1. Doctor: The CT scan result is here (0.5) and that was
2. basically normal erm nothing to suggest any new no new
3. glands you have got some changes on your erm (4.0) lungs
4. from(.) previous radiotherapy (0.5)uhm (1.5) so that's your
5. CT scan and I'm just trying to find the (0.5) lung function
6. tests(.) when did you have those done
7. Patient: (2.0) had them done
8. Husband: Two weeks ago

**Table 2****0 initiated patient questions**

1. Doctor: Okay (.) um (0.5) scan result was fine
2. Patient: Good
3. Doctor: Good okay an everything's stable on the in the
4. bones
5. Patient: Right



**Table 3****0 patient questions**

1. Doctor: Your scan shows everything is the same
2. Patient: Good
3. Doctor: So that's very good

**Table 4****1 patient initiated question**

1. Doctor: And you've had an echocardiogram of your heart an
2. that's all fine
3. Patient: Is it [okay
4. Doctor: [you had that done on?
5. Patient: °Last Friday°
6. Doctor: Last Friday that's all fine (.) no problems so
7. that's good news could I er examine you

The sequences in tables 1-4 show the announcement of diagnostic results depicting the type 1 delivery. In each case the results are delivered in a general, non-specific way characterised by a general clinical assessment, 'fine', 'normal' or 'no change'. In each case this type of delivery

1  
2  
3 produces a minimal response from the patient. It seems that this is partly to do with the fact that  
4  
5 the general delivery projects a paternalistic approach where the doctor presents his/her  
6  
7 interpretation of the results as the authoritative one, without any specific reference to further  
8  
9 details of the findings.<sup>21</sup> Consequently, the patient is invited to accept the diagnostic judgement  
10  
11 of the doctor and the general, non-specific explanation of the results is reflected in the general,  
12  
13 non-specific response provided by the patient.<sup>19</sup> In almost a third of the sample, apart from the  
14  
15 sequence in table 4, the patient does not question or inquire further into the results following the  
16  
17 type 1 delivery. In table 4 the patient does ask a question, but again this is presented in a general  
18  
19 form 'is it okay?' again reflecting the general way in which the results of the echocardiogram is  
20  
21 presented. However, later on following a physical examination the patient targets back on this  
22  
23 assessment, after a physical examination, following a prompt from the doctor.  
24  
25  
26  
27  
28  
29  
30  
31  
32

- 33 1. Doctor: Is there anything you wanted to ask at all?  
34  
35 2. Patient: I did want to ask about my heart function  
36  
37 3. Doctor: Ya sure  
38  
39 4. Patient: I know you said the echocardiograms are oka:y  
40  
41 5. Doctor: Yes  
42  
43 6. Patient: but has it (.) erm deteriorated at all[through  
44  
45  
46  
47 7. Doctor: [no no  
48  
49  
50  
51  
52  
53  
54  
55  
56  
57  
58  
59  
60

**Elaborate delivery****Table 1****1 patient initiated question**

1. Doctor: The head scan, the CT and the MRI show that there
2. is something in the bones but what is unusual is that it
3. seems to be more on the right hand side than the left and I
4. think it was the left eye you were having problems with?
5. Patient: (0.5) Don't they cross?
6. Doctor: Well sometimes if it's more of a visual problem
7. they do cross yeah

In this sequence there are two distinctive features which appear to shape the patient's response. Firstly, the doctor delivers the findings from the scan and produces an expression of uncertainty regarding which eye the patient was having problems with. Secondly, there is a half second pause following the delivery which not only provides the patient with the opportunity to respond but also scope to negotiate the nature of that response.

**Table 2****5 patient initiated questions**

1. Doctor: Your scan shows that things are very much the
2. same, maybe slightly bigger but literally by 4mm both in

1  
2  
3 3. the chest and in the bowel  
4

5 4. Patient: Is it possible for me to see the scan?  
6

7 5. Doctor: Yes, these are your lungs, that's your heart  
8

9 6. Patient: Where's the tumor?  
10

11 7. Doctor: That's it  
12

13 8. Patient: It's there? So when I saw it previously it was  
14

15 9. about that size?  
16

17 10. Doctor: It's only a couple of centimetres most  
18

19 11. Patient: As small as that? In fact it's smaller  
20

21 12. than when I first came about walnut size  
22

23 13. Doctor: It doesn't really say how big it was  
24

25 14. initially  
26

27 15. Patient: So it would be about like that wouldn't it?  
28

29 16. Doctor: Yeah  
30

31 17. Patient: It was on the lymph gland, is that the lymph  
32

33 18. gland?  
34

35 19. Doctor: No that's your bowel that's the tumor and  
36

37 20. that's your bowel there and that's your aneurism  
38

39 21. they've measured it for you 55 mm  
40  
41  
42  
43  
44  
45  
46  
47  
48  
49  
50

51 In this sequence the results are delivered and carefully explicated with the inclusion of numerical  
52 data specifying the size of the cancerous growth (lines 1-3). This provides the patient with a  
53 precise frame of reference regarding the cancer. Interestingly in this case the patient, in response,  
54  
55  
56  
57  
58  
59  
60

1  
2  
3 asks to see the scan (line 4). The doctor then identifies the patient's lungs and heart providing the  
4  
5 relevance for the proximal distance of the tumour from the lungs and heart. The patient (line 6)  
6  
7 then asks about the location of the tumour, its size (lines 8-9, 11) and finally asks about the  
8  
9 lymph gland (line 17-18).  
10  
11  
12  
13  
14  
15

16  
17 **Table 3**

18  
19 **2 patient initiated questions**

- 20  
21  
22 1. Doctor: The scan is very much the same erm there hasn't  
23  
24 2. been um any obvious problems there is quite a lot of  
25  
26 3. fibrosis still but that's to be expected so fibrosis is  
27  
28 4. healing and scarring  
29  
30 5. Patient: Where's that?  
31  
32 6. Doctor: Umm both in the air in the central areas you know  
33  
34 7. where all the problems originally were with the  
35  
36 8. swallowing so in the central area and in the tummy um (2.0)  
37  
38 9. °let me tell you exactly°  
39  
40 10. Patient: Was that there before?  
41  
42  
43 11. Doctor: They've said there's an increase in the volum  
44  
45 12. of that fibrosis  
46  
47 13. Patient: So basically that's scar tissue, is that what  
48  
49 14. you're saying?  
50  
51  
52  
53  
54  
55  
56  
57  
58  
59  
60

1  
2  
3 This delivery of diagnostic news starts out almost as a type 1 delivery ('The scan is very much  
4 the same') but then goes on to point out that fibrosis is still present which is 'to be expected'.  
5  
6

7  
8 The doctor then explains the term fibrosis and the patient responds (line 5) by asking where it is.  
9

10 When the doctor explains the location of the fibrosis, the patient asks if it was present before.  
11

12 The doctor then refers to the report regarding the increase in fibrosis and the patient (line 13)  
13 then presents a gloss of the meaning of the news which is posed as a question.  
14  
15  
16  
17

#### 18 **Table 4**

##### 19 **5 patient initiated questions**

- |    |                                                               |
|----|---------------------------------------------------------------|
| 20 |                                                               |
| 21 |                                                               |
| 22 |                                                               |
| 23 |                                                               |
| 24 |                                                               |
| 25 | 1. Doctor: So they've reported it as stable disease basically |
| 26 | 2. nothing new to find there are some lymph nodes in your     |
| 27 | 3. pelvis but there's nothing different from that             |
| 28 | 4. Patient: Just where exactly?                               |
| 29 | 5. Doctor: Did you want to look at your scan you [can         |
| 30 | 6. Patient: [Will I be                                        |
| 31 | 7. able to tell from that?                                    |
| 32 | 8. Doctor: Well we can look at it together                    |
| 33 | 9. Patient: Yeah                                              |
| 34 | 10. Doctor: (3.0) So this is your pelvis                      |
| 35 | 11. Patient: Right                                            |
| 36 | 12. Doctor: This is your right hip and that is your left      |
| 37 | 13. hip=                                                      |
| 38 | 14. Patient: =Mhm                                             |
| 39 |                                                               |
| 40 |                                                               |
| 41 |                                                               |
| 42 |                                                               |
| 43 |                                                               |
| 44 |                                                               |
| 45 |                                                               |
| 46 |                                                               |
| 47 |                                                               |
| 48 |                                                               |
| 49 |                                                               |
| 50 |                                                               |
| 51 |                                                               |
| 52 |                                                               |
| 53 |                                                               |
| 54 |                                                               |
| 55 |                                                               |
| 56 |                                                               |
| 57 |                                                               |
| 58 |                                                               |
| 59 |                                                               |
| 60 |                                                               |

1  
2  
3  
4 15. Doctor: And then you've got some lymph nodes that are  
5  
6 16. predominantly on the on the right hand side  
7  
8 17. Patient: Yes right so the other side is what they  
9  
10 18. should look like is it?  
11  
12 19. Doctor: Yeah you've got some tiny lymph nodes there  
13  
14 20. they're normally a centimeter and a half is as big as  
15  
16 21. you'd expect them to be normally  
17  
18 22. Patient: Right  
19  
20 23. Doctor: You have got some higher up as well  
21  
22 24. Patient: So that's more into the tummy?  
23  
24 25. Doctor: Yeah  
25  
26 26. Patient: Dya think it is possible that thee enlarged  
27  
28 27. (.) lymph nodes could be (0.5) pressing on a ne::rve  
29  
30 28. [or  
31  
32 29. Doctor: [Sometimes they can do ya ya  
33  
34  
35  
36  
37  
38  
39

40  
41 The diagnostic news in this delivery specifies the fact that there 'are some lymph nodes'. In  
42  
43 response the patient asks 'where' exactly' (line 6). The doctor then asks the patient if they would  
44  
45 like to look at their scan. Interestingly the patient's next question ('will I be able to tell from  
46  
47 that?') at line 7 manifests the knowledge-competence gap between doctors and patients. This  
48  
49 may partly account for why doctors do not always invite patients to look at scan/x-ray results and  
50  
51 why patients do not always ask to see them when they are available. The doctor's response ('we  
52  
53 can look at it together') bridges this gap by inviting the patient to examine the scan jointly  
54  
55  
56  
57  
58  
59  
60

1  
2  
3 allowing the doctor to identify, for the patient, key anatomical structures whilst also allowing the  
4  
5 patient to inquire further.  
6  
7  
8  
9

10  
11 The sequences in tables 1-4 show the announcement of diagnostic results depicting the type 2  
12  
13 delivery. In these sequences the results are delivered alongside a clinical assessment which either  
14  
15 includes a numerical reading or further explication of the findings. When results are delivered in  
16  
17 this way, patients tend to engage with the doctor. An important consequence of this is higher  
18  
19 levels of patient involvement including more patient initiated questions.  
20  
21  
22  
23  
24  
25  
26

## 27 **Discussion**

28  
29  
30  
31  
32  
33  
34 In the main, consultations covered topics such as treatment, the progression of the cancer itself  
35  
36 and the symptoms experienced by the patient. Not all topics were addressed in every consultation  
37  
38 and doctors varied in how they dealt with each topic. We found that generally patients' actual  
39  
40 levels of involvement in the consultation were relatively low and patients varied in how active  
41  
42 they were in seeking information. We also found that, on the whole, patients seemed disinclined  
43  
44 to ask questions or show communication behaviours designed to elicit information. This finding  
45  
46 is consistent with much earlier research into this topic.<sup>6,17</sup>  
47  
48  
49  
50  
51  
52

53 In relation to discussions of test results between doctor and patient, the data appear to indicate  
54  
55 that there may be a connection between the way in which the results are delivered and the  
56  
57 occurrence of patient initiated direct questions. That is to say, the plainer announcement of  
58  
59  
60



1  
2  
3 diagnostic results ('your scan is fine' - Type 1), which does not include sharing the diagnostic  
4  
5 evidence projects a more paternalistic approach implicit in which, the patient is expected to  
6  
7 accept the diagnostic judgement of the doctor. It is also characterised by a general explanation of  
8  
9 the results which is reflected in the general response provided by the patient.<sup>19</sup> In contrast the  
10  
11 Type 2 delivery is much more accommodative of patient input. Moreover, the invocation of the  
12  
13 scan or the x-ray, where appropriate, appears to be significant in encouraging patient  
14  
15 involvement and consequently patient initiated direct questions. Incorporating and explaining the  
16  
17 evidence appears to be interpreted by patients as an opportunity to contribute to the consultation  
18  
19 and establish their information needs in an environment within which the patient's  
20  
21 queries/opinions are welcomed. Unless the patient has specifically requested not to see scans or  
22  
23 x-rays, this would appear to be an effective way of encouraging patient involvement generally  
24  
25 and increasing levels of patient question asking. Consequently, patients are then able to establish  
26  
27 and satisfy their information needs in a timely and effective way.  
28  
29  
30  
31  
32  
33  
34  
35

36 In cases where patients did ask more questions, there was no significant increase in consultation  
37  
38 length and no patient refused the offer of looking at examination results. The examples presented  
39  
40 above were carefully selected because they display the most marked variation in consultation  
41  
42 style highlighting clear contrasts between the two types of delivery.  
43  
44  
45  
46  
47

48 A number of different types of intervention have been used in cancer care to help facilitate  
49  
50 patient involvement. For example, question prompt lists have been used quite widely, but their  
51  
52 actual implementation in consultations is not always straightforward and their rates of success do  
53  
54 vary.<sup>15</sup> Moreover, we found in our study, that even when patients entered the consultation with  
55  
56  
57  
58  
59  
60

1  
2  
3 question lists, they often left the consultation without having asked the questions they came  
4 prepared for.  
5  
6  
7  
8  
9

10 The finding that when the doctor elaborates or explicates findings from the evidence, this can  
11 increase levels of patient involvement has been identified previously in a study of primary care  
12 consultations.<sup>20</sup> Clearly there are important differences between an oncology consultation and a  
13 primary care consultation. However, in relation to consulting behaviours, in both settings there  
14 appear to be striking similarities. That is to say, careful explication of diagnostic findings can  
15 encourage patient involvement such as, in this case, question asking, which in turn can enable  
16 patients to establish their information needs. Further research in this area demands a closer  
17 investigation of what Frankel<sup>9</sup> has described as the ‘presuppositional grounds upon which the  
18 communication situation itself rests’. This would then allow us to identify other consulting  
19 behaviours doctors can utilise to encourage patient involvement.  
20  
21  
22  
23  
24  
25  
26  
27  
28  
29  
30  
31  
32  
33  
34  
35

36 There may be a number of reasons why patients are disinclined to ask questions following the  
37 ‘your scan result is fine’ type of announcement. The minimal responses identified may not  
38 actually be conditioned solely by the type of announcement of test results but may also be a  
39 consequence of patient preference or information needs at that particular moment. As noted, in  
40 Type 1, table 4 the patient targets back on a general assessment of the echocardiogram as ‘okay’.  
41  
42  
43  
44  
45  
46  
47  
48 This clearly merits further empirical investigation.  
49  
50  
51  
52  
53  
54  
55  
56  
57  
58  
59  
60

## Conclusion

Currently there is good research evidence indicating that patient initiated question asking should be encouraged. Doctors need to be able to encourage patient question asking to ensure that patients have at their disposal an important means through which they can determine and express their information needs. This study confirms the findings from previous studies showing that levels of patient initiated questions in Oncology are relatively low. Our study suggests that patient initiated question asking can be encouraged through timely and deliberate information giving which incorporates an explanation and display of test results. The findings at this stage are only suggestive and further exploration is required to establish their actual significance. Studies which involve closer examination of the actual interactional episodes between doctors and patients are required to provide a deeper understanding of patient initiated questions and the situational variables which may influence them.

## References

1. Butow P.N., Maclean M, Dunn S.M., Tattersall M.H.N., Boyer M.J. The dynamics of change: Cancer patients' preferences for information, involvement and support. *Annals of Oncology* 1997; 8: 857-863.
2. Gattellari M, Butow P.N., Tattersall M.H.N. Sharing decisions in cancer care. *Social Science and Medicine* 2001; 52: 1865-1878.
3. Leydon G.M., Boulton M, Moynihan C, Jones A, Mossman J, Boudioni M, et al. Cancer patients' information needs and information seeking behaviour: in-depth interview study. *BMJ* 2000; 320: 909-913.
4. Jenkins V., Fallowfield L., Saul J. Information needs of patients with cancer: results from a large study in UK cancer centres. *British Journal of Cancer* 2001; 84: 48-51.
5. Cox A., Jenkins V., Catt S., Langridge C., and Fallowfield L. Information needs and experiences: An audit of UK cancer patients. *European Journal of Oncology Nursing*. 2006; Vol. 10 Issue 4 263-272.
6. Beisecker A.E. and Beisecker T.D. Patient information seeking behaviours when communicating with doctors. *Medical Care*. 1990; Vol. 28, No. 1: 19-28
7. Cegala D, Marinelli T and Post D. The effect of patient communication skills training on compliance. *Archives of Family Medicine*. 2000; 9: 957-964.
8. Street R.L. and Millay B. Analysing patient participation in medical encounters. *Health Communication*. 2001; Vol. 13, Issue 1: 61-73

- 1  
2  
3 9. Frankel R, Talking in interviews: a dispreference for patient initiated questions in  
4  
5 physician-patient encounters. In Psathas G, (ed.) Interaction Competence. Lanham, MD:  
6  
7 University Press of America, 1990: 231-261  
8  
9
- 10  
11 10. Cegala D, Street R.L., and Clinch R.C. The impact of patient participation on physicians'  
12  
13 information provision during a primary care medical interview. Health Communication,  
14  
15 2007; Vol. 21, Issue 2: 177-185.  
16
- 17  
18 11. Butow P.N. et al. Oncologists reactions to cancer patients' verbal cues. Psycho-oncology.  
19  
20 Vol. 11, Issue 1 2002; 47-58.  
21
- 22  
23 12. Eggly S. et al. Information seeking during "bad news" oncology interactions: Question  
24  
25 asking by patients and their companions. Social Science and Medicine, 2006; 63: 2974-  
26  
27 2985.  
28
- 29  
30 13. Eggly S. et al. Variation in question asking during cancer clinical interactions: A  
31  
32 potential source of disparities in access to information. Patient Education and  
33  
34 Counselling, 2011; Vol. 82, Issue 1: 63-68.  
35
- 36  
37 14. Brown R, Butow PN, Boyer MJ and Tattersall MHN. Promoting patient participation in  
38  
39 the cancer consultation: evaluation of a prompt sheet and coaching in question asking.  
40  
41 British Journal of Cancer 1999; Vol. 80: 242-248  
42
- 43  
44 15. Dimoska A, Tattersall M.H.N, Butow PN, Shepherd H. Can a "prompt list" empower  
45  
46 cancer patients to ask relevant questions. Cancer 2008; Vol. 113, Issue 2: 225-237.  
47
- 48  
49 16. Butow PN, Dunn SM, Tattersall MHN, and Jones QJ. Computer-based interaction  
50  
51 analysis of the cancer consultation. British Journal of Cancer 1995; Vol. 71: 1115-1121.  
52  
53  
54  
55  
56  
57  
58  
59  
60

- 1  
2  
3  
4  
5  
6  
7  
8  
9  
10  
11  
12  
13  
14  
15  
16  
17  
18  
19  
20  
21  
22  
23  
24  
25  
26  
27  
28  
29  
30  
31  
32  
33  
34  
35  
36  
37  
38  
39  
40  
41  
42  
43  
44  
45  
46  
47  
48  
49  
50  
51  
52  
53  
54  
55  
56  
57  
58  
59  
60
17. Street RL Information giving in medical consultations: The influence of patients' communicative styles and personal characteristics. *Social Science and Medicine* 1991; Vol 32. Issue 5: 541-548.
  18. Street RL, Gordon HS, Ward MM, Krupat E, Kravitz RL. Patient participation in medical consultations: Why some patients are more involved than others. *Medical Care* 2005; Vol 43, No. 10: 960-969.
  19. Collins S, Drew P, Watt I, and Entwistle V. 'Unilateral' and 'bilateral' practitioner approaches in decision-making about treatment. *Social Science and Medicine* 2005; 61: 2611-2627.
  20. Perakyla A, Communicating and responding to diagnosis in Heritage J, and Maynard D. (eds.) *Communication in Medical Care*. 2006: 214-247.
  21. Pomerantz A, and E. Sean Rintel. Practices for reporting and responding to test results during medical consultations: enacting the roles of paternalism and independent expertise. *Discourse Studies* 2004; Vol. 6 (1): 9-26.
  22. Heritage J, and Maynard D. *Communication in Medical Care: Interaction between Primary Care Physicians and Patients*. 2006. Cambridge: Cambridge University Press.

### Copyright/licence for publication

“The Corresponding Author has the right to grant on behalf of all authors and does grant on behalf of all authors, a [worldwide licence](#) to the Publishers and its licensees in perpetuity, in all forms, formats and media (whether known now or created in the future), to i) publish, reproduce, distribute, display and store the Contribution, ii) translate the Contribution into other languages, create adaptations, reprints, include within collections and create summaries, extracts and/or, abstracts of the Contribution, iii) create any other derivative work(s) based on the Contribution, iv) to exploit all subsidiary rights in the Contribution, v) the inclusion of electronic links from the Contribution to third party material where-ever it may be located; and, vi) licence any third party to do any or all of the above.”

### Competing interests

All authors have completed the ICMJE uniform disclosure form at [www.icmje.org/coi\\_disclosure.pdf](http://www.icmje.org/coi_disclosure.pdf) (available on request from the corresponding author) and declare: no support from any organisation for the submitted work; no financial relationships with any organisations that might have an interest in the submitted work in the previous three years; no other relationships or activities that could appear to have influenced the submitted work."

### Contributorship statement

All authors contributed to the research study. As PI AT led the study design with contributions from GM and LF. GM and LF led the data collection and analysis with contributions from AT. The first draft of the paper was prepared by GM and then subsequently all authors contributed to data interpretation and revisions to the manuscript. All authors had full access to the data derived from the study and can take full responsibility for the integrity of the data and the accuracy of the data analysis.

### Data sharing

There is no additional data available

### Ethics approval

This paper is an outcome from a study funded by the NIHR Research for Patient Benefit Programme. The funding body did not partake in the design of the study, collection, analysis and interpretation of data, writing and submission of the article for publication. The study received ethical approval from the Nottingham research ethics committee 2 ID: 09/H0408/34. All participants in the study gave informed consent before taking part. All authors are independent

1  
2  
3 from the funding body. Each had had full access to all of the data in the study and can take  
4 responsibility for the integrity of the data and the accuracy of the data analysis  
5  
6

7 This paper presents independent research funded by the National Institute for Health Research  
8 (NIHR) under its Research for Patient Benefit (RfPB) Programme (Grant Reference Number PB-  
9 PG-0807-14122). The views expressed are those of the author(s) and not necessarily those of the  
10 NHS, the NIHR or the Department of Health.  
11  
12  
13  
14  
15  
16  
17  
18  
19  
20  
21  
22  
23  
24  
25  
26  
27  
28  
29  
30  
31  
32  
33  
34  
35  
36  
37  
38  
39  
40  
41  
42  
43  
44  
45  
46  
47  
48  
49  
50  
51  
52  
53  
54  
55  
56  
57  
58  
59  
60

For peer review only



# Please wait...

If this message is not eventually replaced by the proper contents of the document, your PDF viewer may not be able to display this type of document.

You can upgrade to the latest version of Adobe Reader for Windows®, Mac, or Linux® by visiting <http://www.adobe.com/products/acrobat/readstep2.html>.

For more assistance with Adobe Reader visit <http://www.adobe.com/support/products/acrreader.html>.

Windows is either a registered trademark or a trademark of Microsoft Corporation in the United States and/or other countries. Mac is a trademark of Apple Inc., registered in the United States and other countries. Linux is the registered trademark of Linus Torvalds in the U.S. and other countries.

# Please wait...

If this message is not eventually replaced by the proper contents of the document, your PDF viewer may not be able to display this type of document.

You can upgrade to the latest version of Adobe Reader for Windows®, Mac, or Linux® by visiting [http://www.adobe.com/go/reader\\_download](http://www.adobe.com/go/reader_download).

For more assistance with Adobe Reader visit <http://www.adobe.com/go/acrreader>.

Windows is either a registered trademark or a trademark of Microsoft Corporation in the United States and/or other countries. Mac is a trademark of Apple Inc., registered in the United States and other countries. Linux is the registered trademark of Linus Torvalds in the U.S. and other countries.

# Please wait...

If this message is not eventually replaced by the proper contents of the document, your PDF viewer may not be able to display this type of document.

You can upgrade to the latest version of Adobe Reader for Windows®, Mac, or Linux® by visiting [http://www.adobe.com/go/reader\\_download](http://www.adobe.com/go/reader_download).

For more assistance with Adobe Reader visit <http://www.adobe.com/go/acrreader>.

Windows is either a registered trademark or a trademark of Microsoft Corporation in the United States and/or other countries. Mac is a trademark of Apple Inc., registered in the United States and other countries. Linux is the registered trademark of Linus Torvalds in the U.S. and other countries.



**Patient initiated questions: how can doctors encourage them and improve the consultation process? A qualitative study**

|                                                                                                                                                                                                                                                 |                                                                                                                                                                                                                                                         |
|-------------------------------------------------------------------------------------------------------------------------------------------------------------------------------------------------------------------------------------------------|---------------------------------------------------------------------------------------------------------------------------------------------------------------------------------------------------------------------------------------------------------|
| Journal:                                                                                                                                                                                                                                        | <i>BMJ Open</i>                                                                                                                                                                                                                                         |
| Manuscript ID:                                                                                                                                                                                                                                  | bmjopen-2013-003112.R2                                                                                                                                                                                                                                  |
| Article Type:                                                                                                                                                                                                                                   | Research                                                                                                                                                                                                                                                |
| Date Submitted by the Author:                                                                                                                                                                                                                   | 28-Jun-2013                                                                                                                                                                                                                                             |
| Complete List of Authors:                                                                                                                                                                                                                       | Murtagh, Ged; Imperial College London, Surgery and Cancer<br>Furber, Lynn; University of Leicester, Department of Cancer Studies and Molecular Medicine<br>Thomas, Anne; Leicester Royal Infirmary, Department of Cancer Studies and Molecular Medicine |
| <b>Primary Subject Heading</b>:                                                                                                                                                                                                                 | Communication                                                                                                                                                                                                                                           |
| Secondary Subject Heading:                                                                                                                                                                                                                      | Oncology                                                                                                                                                                                                                                                |
| Keywords:                                                                                                                                                                                                                                       | QUALITATIVE RESEARCH, ONCOLOGY, MEDICAL EDUCATION & TRAINING                                                                                                                                                                                            |
| <p>Note: The following files were submitted by the author for peer review, but cannot be converted to PDF. You must view these files (e.g. movies) online.</p> <p>New_patients1.3approved[1].docm<br/>Follow_up_patients1.3approved[1].docm</p> |                                                                                                                                                                                                                                                         |

SCHOLARONE™  
Manuscripts

1  
2  
3 **Patient initiated questions: how can doctors encourage them and improve the consultation**  
4 **process? A qualitative study**  
5  
6  
7

8  
9 Dr. GM Murtagh,<sup>1</sup> Dr L Furber<sup>2</sup> Dr. AL Thomas<sup>3</sup>  
10  
11

12  
13  
14  
15  
16 <sup>1</sup> Senior Lecturer in Clinical Communication, Division of Surgery, Department of Surgery and  
17 Cancer, St Mary's Campus, Imperial College London, South Wharf Road, London W2 1BL  
18 [g.murtagh@imperial.ac.uk](mailto:g.murtagh@imperial.ac.uk)  
19  
20  
21

22  
23 <sup>2</sup> Senior Nurse Researcher, Department of Cancer Studies and Molecular Medicine  
24 Robert Knighton Clinical Sciences Building, University of Leicester, Leicester Royal Infirmary,  
25 Leicester LE2 7LX  
26  
27  
28

29  
30 <sup>3</sup> Reader and Consultant in Medical Oncology, Department of Cancer Studies and Molecular  
31 Medicine, Leicester Royal Infirmary  
32 Leicester LE 1 5WW  
33  
34  
35  
36  
37  
38

39 **Correspondence to:**  
40  
41

42 Dr. G.M. Murtagh  
43 Division of Surgery, Department of Surgery and Cancer, St Mary's Hospital,  
44 Imperial College London, South Wharf Road, London W2 1BL  
45  
46 [g.murtagh@imperial.ac.uk](mailto:g.murtagh@imperial.ac.uk)  
47  
48  
49  
50  
51  
52

53 **Manuscript word count 3,505**  
54

55 **Abstract word count: 237**  
56  
57  
58  
59  
60

## Abstract

**Objective:** To investigate the circumstances under which patients initiate direct questions in oncology consultations

**Design:** Conversation analysis of 47 consultations between oncologists and cancer patients

**Setting:** An oncology clinic at a teaching hospital in the East Midlands.

**Participants:** 16 Oncologists and 67 cancer patients

**Outcome measure:** Patient initiated direct questions

**Results:** On the whole patients' direct questions are designed to seek specific information regarding, the cancer itself, treatment options or their experience of symptoms. When patients do ask direct questions they typically follow the announcement of test results where some reference to the details of those results, is provided. More specifically, there appears to be a relation between showing the patient their scan/x-ray results, patient involvement and patient initiated direct questions. Higher levels of patient initiated direct questions were clustered around occasions where doctors provided information and explanations of test results (twelve consultations) sometimes with direct reference to scan or x-ray results (seven consultations).

**Conclusions:** This study highlights the importance of careful explanation of diagnostic evidence as a factor contributing to increased patient involvement. More specifically, the findings suggest

1  
2  
3 that, when appropriate, invoking diagnostic evidence (e.g. scan or x-ray results) is an effective  
4 way of increasing levels of patient question asking. Doctors need to be able to encourage patient  
5 question asking to ensure that patients have at their disposal an important means through which  
6 they can determine their information needs. Although these results come from a study of  
7 oncology consultations, this finding may be transferable to other clinical contexts.  
8  
9  
10  
11  
12  
13  
14  
15  
16  
17  
18  
19  
20  
21  
22  
23  
24  
25  
26  
27  
28  
29  
30  
31  
32  
33  
34  
35  
36  
37  
38  
39  
40  
41  
42  
43  
44  
45  
46  
47  
48  
49  
50  
51  
52  
53  
54  
55  
56  
57  
58  
59  
60

## Article Summary

- In cancer care patient question asking can significantly influence the provision of information from the doctor.
- The paper extends the existing research into communication in cancer care by reporting on distinctive patterns of communication behaviour which influence, in this case, patient question asking.

## Key Messages

- The frequency of direct questions initiated by patients in oncology consultations is relatively low.
- Explicating test results alongside diagnostic evidence increases the chances of patient initiated direct questions in oncology consultations.
- This finding has implications for understanding how doctors can encourage patient questions within cancer care and, potentially, other clinical settings.

## Strengths and Limitations of this study

- The strength of the study is that it targets actual instances of question asking behaviour in relation to other situational variables in the consultation.



- The study is limited by its sole reliance on audio recordings of consultations.

Consequently, other aspects of social interaction, e.g. eye contact, bodily comportment etc which can also have a significant influence on the content of the consultation, have not been included.

For peer review only

## Introduction

One of the main problems oncologists face in the consultation is the difficulty of accurately gauging the patient's information needs.<sup>1,2</sup> Studies have examined patient preferences for information provision and involvement<sup>1,3,4,5</sup> and have shown, among other things, that patients do want specific information concerning their illness.<sup>4,5</sup> However, patients' information needs are not static and there can be significant variations between patients in terms of their preferences for the timing, content and detail of information they require. Such variations may change during the course of an illness and even during the course of a single consultation depending on the type of information a patient receives.<sup>1</sup> Consequently, patients' attempts to elicit information from doctors also varies. These contingencies indicate a real need to understand more about the conditions under which patients actively seek information and, more specifically, the kinds of communication behaviours patients use to seek out information. Among these behaviours, question asking is key, as it can be used as a basic form of information seeking.<sup>6</sup> When patients ask questions it allows them to shape their own levels of involvement<sup>8</sup> and handle the contingencies of information exchange.<sup>9</sup> In addition, patient question asking has been linked to improved information provision.<sup>8,10</sup> Moreover, patients who receive an answer to their question demonstrate better psychological adjustment following the consultation than those who ask questions but don't receive a response.<sup>16,17</sup>

1  
2  
3 These findings still beg the question, how and when do patients ask questions? In the context of  
4 cancer care, studies have shown that direct questions (alongside indirect cues) occur most often  
5 during the treatment phase of the consultation<sup>11</sup>; that companions who accompany patients, tend  
6 to ask more questions than patients particularly in relation to treatment and diagnosis<sup>12</sup>; that  
7 ethnic and racial differences between patients can reflect differences in levels of question asking  
8 and direct question asking<sup>13</sup>; that question prompt lists can encourage patient question asking  
9 particularly in relation to prognosis and diagnosis.<sup>14,15</sup>  
10  
11  
12  
13  
14  
15  
16  
17  
18  
19

20  
21  
22  
23  
24 These studies provide valuable direction in understanding some of the factors behind patient  
25 question asking in cancer care. However, there is still a lot that is unknown about the specific  
26 situational variables which underpin and shape patient question asking in relation to the doctor's  
27 communication behaviours. The extent to which patients initiate information seeking, in the first  
28 place, is often contingent on the doctor's communicative style. The import of this lies in the fact  
29 that when patients seek information (e.g. through asking questions), doctors typically respond in  
30 more informative and accommodative ways,<sup>18</sup> simply because patient questions are one of the  
31 ways in which patients establish their information needs. The purpose of this study was to  
32 capture the interactional and situational variables that occur alongside patient initiated questions  
33 to establish how and when patients are more inclined to initiate direct questions.  
34  
35  
36  
37  
38  
39  
40  
41  
42  
43  
44  
45  
46  
47  
48  
49  
50  
51  
52  
53  
54  
55  
56  
57  
58  
59  
60

## Methods

The study was carried out in a large UK Cancer Centre. LF recruited patients (with different types of cancers) attending the oncology department (n=77) as well as a mix of oncology consultants and specialist registrars. Both newly diagnosed and follow up patients were recruited to ensure maximum variability in our sample group. Following each consultation patients were invited to complete a satisfaction questionnaire and interviews were conducted with the patients by LF shortly after their consultation. **Each of the interviews were analysed to identify common themes across the data until saturation was reached. Patient consent was obtained before their consultation was recorded and before collecting questionnaire data. This paper reports on the recordings of the consultation data only.**

We audio recorded 47 consultations which were then transcribed and analysed using conversation analysis,<sup>22</sup> a method of analysis which details characteristics of speech exchange including pauses, pace and intonation etc (the transcription symbols used to indicate these characteristics are provided in table 1). In each consultation we identified the number of patient initiated questions which arose. We then examined the location of these questions which allowed us to identify clusters around diagnostic news delivery. We also noted, however, that in other consultations patient initiated questions were minimal or absent on occasions of diagnostic news discussion. This led us to question if there was a relation between the doctor's communication behaviour and the patient's response when doctor and patient talked about test results. Using this as our focal point we identified 30 of the 47 consultations where the relation between style of diagnostic news delivery. (elaborate/restricted) and patient response/involvement (patient

1  
2  
3 initiated questions/no patient initiated questions) was most clear. The paper reports on a sample  
4 from that selection of 30. Transcription and analysis was carried out by GM. Subsequent  
5 analyses were carried out by GM, AT and LF. Any disagreements regarding interpretation of the  
6 data were resolved through discussion and by revisiting the data. Inclusion Criteria: Patients over  
7 the age of eighteen, having been diagnosed with cancer, aware of their diagnosis and willing to  
8 participate in the study. Exclusion criteria: Any patient unable to consent for themselves, patients  
9 with a cognitive impairment and patients who do not speak fluent English.  
10  
11  
12  
13  
14  
15  
16  
17  
18  
19  
20  
21  
22

### 23 **Analysis**

24  
25  
26 For the purposes of analysis we defined a direct question as that which is initiated solely by the  
27 patient, without a verbal prompt ('Do you have any questions?') from the doctor and which  
28 targets a specific topic. The consultations were examined with a view to identifying some of the  
29 systematic and recurrent properties of delivering news of test results and the patient's response.  
30  
31 More specifically, we examined how styles of news delivery shape patients' responses, in  
32 particular their levels of question asking.  
33  
34  
35  
36  
37  
38  
39  
40  
41  
42  
43  
44  
45

#### 46 **Transcription symbols**

- 47  
48 • • Talk marked by the degree sound indicates words that are softly spoken  
49  
50 (.) A full stop in brackets indicates a micro pause  
51  
52 (1.0), (0.5) indicates silence in seconds and tenths of seconds  
53  
54  
55 [Okay  
56  
57  
58  
59  
60

1  
2  
3  
4 [Yes           Talk which is preceded by a square bracket indicates overlap in speech between  
5  
6 two different speakers

7  
8 =               Talk marked with the equals sign at the end of one line and the beginning of  
9  
10 another indicates no pause between the end of one utterance and the start of another  
11  
12

## 23 24 25 26 27 28 29 30 31 32 33 34 35 36 37 38 39 40 41 42 43 44 45 46 47 48 49 50 51 52 53 54 55 56 57 58 59 60

### Results

Our focussed sample of 30 consultations in total came to 451.30 mins, just over 7.5 hours of consultation time with the average length of the consultation at 15.04 mins. In 7 out of the 30 consultations (just under 60 mins of consultation time) the patients did not ask any questions. In the remaining 23 consultations there were 76 instances of patients asking questions (avg. 2.5 direct patient questions per consultation). However patients' questions arose in different ways. For example, in 5 out of those 23 consultations (22%) patients' questions came at the end (within 3-4 mins of the end of the consultation) again following a prompt from the doctor. In 6 out of the 23 consultations (26%) there is evidence of indirect or embedded questions arising at different junctures of the consultation following a prompt from the doctor. In 12 of the 23 consultations, (52%) patient initiated direct questions occur specifically in relation to discussion of test results. In 7 of these 12 consultations (58%) patient initiated question asking occurs following a careful explanation of test results and diagnostic evidence e.g. the doctor's use of scan or x-rays. In only two consultations did the patient decline to ask a question following an invitation to do so from

1  
2  
3 the doctor.  
4  
5  
6  
7

8 We noted a number of variations in the way in which doctors deliver test results. Our main  
9  
10 finding, however, is that patients are more inclined to initiate direct questions when doctors  
11  
12 deliver results with direct reference to the diagnostic evidence e.g. x-rays or scans. To exemplify  
13  
14 this we identified two types of information delivery each resulting in different types of patient  
15  
16 response, the most marked difference being levels of patient initiated question asking. In delivery  
17  
18 type 1, test results were delivered in a very general way without elaboration (Restricted delivery  
19  
20 - e.g. 'your scan results are fine'). With this type of delivery patient initiated questions were  
21  
22 absent or minimal. In delivery type 2 (Elaborate delivery - 'your scan shows that...') the doctor  
23  
24 elaborated or explained the test results sometimes invoking the scan or the x-ray to do so. This  
25  
26 type of delivery typically positively influenced levels of patient involvement in the consultation  
27  
28 and prompted more patient initiated direct questions and consequently more information  
29  
30 provision from the doctor.  
31  
32  
33  
34  
35  
36  
37  
38  
39  
40  
41  
42  
43  
44  
45

#### 46 **Restricted delivery**

#### 47 48 49 **Table 1**

#### 50 51 52 **0 patient initiated questions**

1. Doctor: The CT scan result is here (0.5) and that was
2. basically normal erm nothing to suggest any new no new
3. glands you have got some changes on your erm (4.0) lungs
4. from(.) previous radiotherapy (0.5)uhm (1.5) so that's your
5. CT scan and I'm just trying to find the (0.5) lung function
6. tests(.) when did you have those done
7. Patient: (2.0) had them done
8. Husband: Two weeks ago

**Table 2****0 initiated patient questions**

1. Doctor: Okay (.) um (0.5) scan result was fine
2. Patient: Good
3. Doctor: Good okay an everything's stable on the in the
4. bones
5. Patient: Right

**Table 3****0 patient questions**



1. Doctor: Your scan shows everything is the same
2. Patient: Good
3. Doctor: So that's very good

**Table 4****1 patient initiated question**

1. Doctor: And you've had an echocardiogram of your heart an
2. that's all fine
3. Patient: Is it [okay
4. Doctor: [you had that done on?
5. Patient: °Last Friday°
6. Doctor: Last Friday that's all fine (.) no problems so
7. that's good news could I er examine you

The sequences in tables 1-4 show the announcement of diagnostic results depicting the type 1 delivery. In each case the results are delivered in a general, non-specific way characterised by a general clinical assessment, 'fine', 'normal' or 'no change'. In each case this type of delivery produces a minimal response from the patient. It seems that this is partly to do with the fact that the general delivery projects a paternalistic approach where the doctor presents his/her interpretation of the results as the authoritative one, without any specific reference to further

1  
2  
3 details of the findings.<sup>21</sup> Consequently, the patient is invited to accept the diagnostic judgement  
4 of the doctor and the general, non-specific explanation of the results is reflected in the general,  
5 non-specific response provided by the patient.<sup>19</sup> In almost a third of the sample, apart from the  
6 sequence in table 4, the patient does not question or inquire further into the results following the  
7 type 1 delivery. In table 4 the patient does ask a question, but again this is presented in a general  
8 form 'is it okay?' again reflecting the general way in which the results of the echocardiogram is  
9 presented. However, later on following a physical examination the patient targets back on this  
10 assessment, after a physical examination, following a prompt from the doctor.  
11  
12  
13  
14  
15  
16  
17  
18  
19  
20  
21  
22  
23

- 24  
25  
26 1. Doctor: Is there anything you wanted to ask at all?  
27  
28 2. Patient: I did want to ask about my heart function  
29  
30 3. Doctor: Ya sure  
31  
32 4. Patient: I know you said the echocardiograms are oka:y  
33  
34 5. Doctor: Yes  
35  
36 6. Patient: but has it (.) erm deteriorated at all[through  
37  
38 7. Doctor: [no no  
39  
40  
41  
42  
43  
44  
45  
46  
47  
48  
49  
50

### 51 52 53 **Elaborate delivery**

### 54 55 56 **Table 1**

### 1patient initiated question

1. Doctor: The head scan, the CT and the MRI show that there
2. is something in the bones but what is unusual is that it
3. seems to be more on the right hand side than the left and I
4. think it was the left eye you were having problems with?
5. Patient: (0.5) Don't they cross?
6. Doctor: Well sometimes if it's more of a visual problem
7. they do cross yeah

In this sequence there are two distinctive features which appear to shape the patient's response. Firstly, the doctor delivers the findings from the scan and produces an expression of uncertainty regarding which eye the patient was having problems with. Secondly, there is a half second pause following the delivery which not only provides the patient with the opportunity to respond but also scope to negotiate the nature of that response.

### Table 2

#### 5 patient initiated questions

1. Doctor: Your scan shows that things are very much the
2. same, maybe slightly bigger but literally by 4mm both in
3. the chest and in the bowel
4. Patient: Is it possible for me to see the scan?
5. Doctor: Yes, these are your lungs, that's your heart

1  
2  
3  
4  
5  
6  
7  
8  
9  
10  
11  
12  
13  
14  
15  
16  
17  
18  
19  
20  
21  
22  
23  
24  
25  
26  
27  
28  
29  
30  
31  
32  
33  
34  
35  
36  
37  
38  
39  
40  
41  
42  
43  
44  
45  
46  
47  
48  
49  
50  
51  
52  
53  
54  
55  
56  
57  
58  
59  
60

6. Patient: Where's the tumor?

7. Doctor: That's it

8. Patient: It's there? So when I saw it previously it was

9. about that size?

10. Doctor: It's only a couple of centimetres most

11. Patient: As small as that? In fact it's smaller

12. than when I first came about walnut size

13. Doctor: It doesn't really say how big it was

14. initially

15. Patient: So it would be about like that wouldn't it?

16. Doctor: Yeah

17. Patient: It was on the lymph gland, is that the lymph

18. gland?

19. Doctor: No that's your bowel that's the tumor and

20. that's your bowel there and that's your aneurism

21. they've measured it for you 55 mm

In this sequence the results are delivered and carefully explicated with the inclusion of numerical data specifying the size of the cancerous growth (lines 1-3). This provides the patient with a precise frame of reference regarding the cancer. Interestingly in this case the patient, in response, asks to see the scan (line 4). The doctor then identifies the patient's lungs and heart providing the relevance for the proximal distance of the tumour from the lungs and heart. The patient (line 6)

1  
2  
3 then asks about the location of the tumour, its size (lines 8-9, 11) and finally asks about the  
4  
5 lymph gland (line 17-18).  
6  
7  
8  
9  
10

11 **Table 3**

12  
13  
14 **2 patient initiated questions**  
15

- |                                                                                                                                                                                                                                                                                                                                                                                                                                                                                                                                                                                                                                                                                                                                                                                                                                                                                                      |
|------------------------------------------------------------------------------------------------------------------------------------------------------------------------------------------------------------------------------------------------------------------------------------------------------------------------------------------------------------------------------------------------------------------------------------------------------------------------------------------------------------------------------------------------------------------------------------------------------------------------------------------------------------------------------------------------------------------------------------------------------------------------------------------------------------------------------------------------------------------------------------------------------|
| <p>16<br/>17 1. Doctor: The scan is very much the same erm there hasn't<br/>18<br/>19 2. been um any obvious problems there is quite a lot of<br/>20<br/>21 3. fibrosis still but that's to be expected so fibrosis is<br/>22<br/>23 4. healing and scarring<br/>24<br/>25 5. Patient: Where's that?<br/>26<br/>27<br/>28 6. Doctor: Umm both in the air in the central areas you know<br/>29<br/>30 7. where all the problems originally were with the<br/>31<br/>32 8. swallowing so in the central area and in the tummy um (2.0)<br/>33<br/>34 9. °let me tell you exactly°<br/>35<br/>36<br/>37 10. Patient: Was that there before?<br/>38<br/>39<br/>40 11. Doctor: They've said there's an increase in the volum<br/>41<br/>42 12. of that fibrosis<br/>43<br/>44 13. Patient: So basically that's scar tissue, is that what<br/>45<br/>46 14. you're saying?<br/>47<br/>48<br/>49<br/>50</p> |
|------------------------------------------------------------------------------------------------------------------------------------------------------------------------------------------------------------------------------------------------------------------------------------------------------------------------------------------------------------------------------------------------------------------------------------------------------------------------------------------------------------------------------------------------------------------------------------------------------------------------------------------------------------------------------------------------------------------------------------------------------------------------------------------------------------------------------------------------------------------------------------------------------|

51  
52 This delivery of diagnostic news starts out almost as a type 1 delivery ('The scan is very much  
53  
54 the same') but then goes on to point out that fibrosis is still present which is 'to be expected'.  
55

56  
57 The doctor then explains the term fibrosis and the patient responds (line 5) by asking where it is.  
58  
59  
60

1  
2  
3 When the doctor explains the location of the fibrosis, the patient asks if it was present before.  
4  
5  
6 The doctor then refers to the report regarding the increase in fibrosis and the patient (line 13)  
7  
8 then presents a gloss of the meaning of the news which is posed as a question.  
9  
10

11 **Table 4**

12  
13  
14 **5 patient initiated questions**  
15

- 16  
17  
18 1. Doctor: So they've reported it as stable disease basically  
19  
20 2. nothing new to find there are some lymph nodes in your  
21  
22 3. pelvis but there's nothing different from that  
23  
24 4. Patient: Just where exactly?  
25  
26 5. Doctor: Did you want to look at your scan you [can  
27  
28 6. Patient: [Will I be  
29  
30 7. able to tell from that?  
31  
32 8. Doctor: Well we can look at it together  
33  
34 9. Patient: Yeah  
35  
36 10. Doctor: (3.0) So this is your pelvis  
37  
38 11. Patient: Right  
39  
40 12. Doctor: This is your right hip and that is your left  
41  
42 13. hip=  
43  
44 14. Patient: =Mhm  
45  
46 15. Doctor: And then you've got some lymph nodes that are  
47  
48 16. predominantly on the on the right hand side  
49  
50 17. Patient: Yes right so the other side is what they  
51  
52  
53  
54  
55  
56  
57  
58  
59  
60

1  
2  
3  
4  
5  
6  
7  
8  
9  
10  
11  
12  
13  
14  
15  
16  
17  
18  
19  
20  
21  
22  
23  
24  
25  
26  
27  
28  
29  
30  
31  
32

18. should look like is it?

19. Doctor: Yeah you've got some tiny lymph nodes there

20. they're normally a centimeter and a half is as big as

21. you'd expect them to be normally

22. Patient: Right

23. Doctor: You have got some higher up as well

24. Patient: So that's more into the tummy?

25. Doctor: Yeah

26. Patient: Dya think it is possible that thee enlarged

27. (.) lymph nodes could be (0.5) pressing on a ne::rve

28. [or

29. Doctor: [Sometimes they can do ya ya

33  
34  
35  
36  
37  
38  
39  
40  
41  
42  
43  
44  
45  
46  
47  
48  
49  
50  
51  
52  
53  
54  
55  
56  
57  
58  
59  
60

The diagnostic news in this delivery specifies the fact that there 'are some lymph nodes'. In response the patient asks 'where' exactly' (line 6). The doctor then asks the patient if they would like to look at their scan. Interestingly the patient's next question ('will I be able to tell from that?') at line 7 manifests the knowledge-competence gap between doctors and patients. This may partly account for why doctors do not always invite patients to look at scan/x-ray results and why patients do not always ask to see them when they are available. The doctor's response ('we can look at it together') bridges this gap by inviting the patient to examine the scan jointly allowing the doctor to identify, for the patient, key anatomical structures whilst also allowing the patient to inquire further.

1  
2  
3 The sequences in tables 1-4 show the announcement of diagnostic results depicting the type 2  
4 delivery. In these sequences the results are delivered alongside a clinical assessment which either  
5 includes a numerical reading or further explication of the findings. When results are delivered in  
6 this way, patients tend to engage with the doctor. An important consequence of this is higher  
7 levels of patient involvement including more patient initiated questions.  
8  
9  
10  
11  
12  
13  
14  
15  
16  
17  
18  
19

## 20 Discussion

21  
22  
23  
24  
25 In the main, consultations covered topics such as treatment, the progression of the cancer itself  
26 and the symptoms experienced by the patient. Not all topics were addressed in every consultation  
27 and doctors varied in how they dealt with each topic. We found that generally patients' actual  
28 levels of involvement in the consultation were relatively low and patients varied in how active  
29 they were in seeking information. We also found that, on the whole, patients seemed disinclined  
30 to ask questions or show communication behaviours designed to elicit information. This finding  
31 is consistent with much earlier research into this topic.<sup>6,17</sup>  
32  
33  
34  
35  
36  
37  
38  
39  
40  
41  
42  
43  
44

45 In relation to discussions of test results between doctor and patient, the data appear to indicate  
46 that there may be a connection between the way in which the results are delivered and the  
47 occurrence of patient initiated direct questions. That is to say, the plainer announcement of  
48 diagnostic results ('your scan is fine' - Type 1), which does not include sharing the diagnostic  
49 evidence projects a more paternalistic approach implicit in which, the patient is expected to  
50 accept the diagnostic judgement of the doctor. It is also characterised by a general explanation of  
51  
52  
53  
54  
55  
56  
57  
58  
59  
60



1  
2  
3 the results which is reflected in the general response provided by the patient.<sup>19</sup> In contrast the  
4  
5 Type 2 delivery is much more accommodative of patient input. Moreover, the invocation of the  
6  
7 scan or the x-ray, where appropriate, appears to be significant in encouraging patient  
8  
9 involvement and consequently patient initiated direct questions. Incorporating and explaining the  
10  
11 evidence appears to be interpreted by patients as an opportunity to contribute to the consultation  
12  
13 and establish their information needs in an environment within which the patient's  
14  
15 queries/opinions are welcomed. Unless the patient has specifically requested not to see scans or  
16  
17 x-rays, this would appear to be an effective way of encouraging patient involvement generally  
18  
19 and increasing levels of patient question asking. Consequently, patients are then able to establish  
20  
21 and satisfy their information needs in a timely and effective way.  
22  
23  
24  
25  
26  
27  
28

29 In cases where patients did ask more questions, there was no significant increase in consultation  
30  
31 length and no patient refused the offer of looking at examination results. The examples presented  
32  
33 above were carefully selected because they display the most marked variation in consultation  
34  
35 style highlighting clear contrasts between the two types of delivery.  
36  
37  
38  
39  
40

41 A number of different types of intervention have been used in cancer care to help facilitate  
42  
43 patient involvement. For example, question prompt lists have been used quite widely, but their  
44  
45 actual implementation in consultations is not always straightforward and their rates of success do  
46  
47 vary.<sup>15</sup> Moreover, we found in our study, that even when patients entered the consultation with  
48  
49 question lists, they often left the consultation without having asked the questions they came  
50  
51 prepared for.  
52  
53  
54  
55  
56  
57  
58  
59  
60

1  
2  
3 The finding that when the doctor elaborates or explicates findings from the evidence, this can  
4 increase levels of patient involvement has been identified previously in a study of primary care  
5 consultations.<sup>20</sup> Clearly there are important differences between an oncology consultation and a  
6 primary care consultation. However, in relation to consulting behaviours, in both settings there  
7 appear to be striking similarities. That is to say, careful explication of diagnostic findings can  
8 encourage patient involvement such as, in this case, question asking, which in turn can enable  
9 patients to establish their information needs. Further research in this area demands a closer  
10 investigation of what Frankel<sup>9</sup> has described as the ‘presuppositional grounds upon which the  
11 communication situation itself rests’. This would then allow us to identify other consulting  
12 behaviours doctors can utilise to encourage patient involvement.  
13  
14  
15  
16  
17  
18  
19  
20  
21  
22  
23  
24  
25  
26  
27  
28

29 There may be a number of reasons why patients are disinclined to ask questions following the  
30 ‘your scan result is fine’ type of announcement. The minimal responses identified may not  
31 actually be conditioned solely by the type of announcement of test results but may also be a  
32 consequence of patient preference or information needs at that particular moment. As noted, in  
33 Type 1, table 4 the patient targets back on a general assessment of the echocardiogram as ‘okay’.  
34  
35  
36  
37  
38  
39 This clearly merits further empirical investigation.  
40  
41  
42  
43  
44  
45  
46  
47  
48  
49  
50  
51  
52

## 53 **Conclusion**

54  
55  
56  
57  
58  
59  
60

1  
2  
3 Currently there is good research evidence indicating that patient initiated question asking should  
4  
5 be encouraged. Doctors need to be able to encourage patient question asking to ensure that  
6  
7 patients have at their disposal an important means through which they can determine and express  
8  
9 their information needs. This study confirms the findings from previous studies showing that  
10  
11 levels of patient initiated questions in Oncology are relatively low. Our study suggests that  
12  
13 patient initiated question asking can be encouraged through timely and deliberate information  
14  
15 giving which incorporates an explanation and display of test results. The findings at this stage are  
16  
17 only suggestive and further exploration is required to establish their actual significance. Studies  
18  
19 which involve closer examination of the actual interactional episodes between doctors and  
20  
21 patients are required to provide a deeper understanding of patient initiated questions and the  
22  
23 situational variables which may influence them.  
24  
25  
26  
27  
28  
29  
30  
31  
32  
33  
34  
35  
36  
37  
38  
39  
40  
41  
42  
43  
44  
45  
46  
47  
48  
49  
50  
51  
52  
53  
54  
55  
56  
57  
58  
59  
60

## References

1. Butow P.N., Maclean M, Dunn S.M., Tattersall M.H.N., Boyer M.J. The dynamics of change: Cancer patients' preferences for information, involvement and support. *Annals of Oncology* 1997; 8: 857-863.
2. Gattellari M, Butow P.N., Tattersall M.H.N. Sharing decisions in cancer care. *Social Science and Medicine* 2001; 52: 1865-1878.
3. Leydon G.M., Boulton M, Moynihan C, Jones A, Mossman J, Boudioni M, et al. Cancer patients' information needs and information seeking behaviour: in-depth interview study. *BMJ* 2000; 320: 909-913.
4. Jenkins V., Fallowfield L., Saul J. Information needs of patients with cancer: results from a large study in UK cancer centres. *British Journal of Cancer* 2001; 84: 48-51.
5. Cox A., Jenkins V., Catt S., Langridge C., and Fallowfield L. Information needs and experiences: An audit of UK cancer patients. *European Journal of Oncology Nursing*. 2006; Vol. 10 Issue 4 263-272.
6. Beisecker A.E. and Beisecker T.D. Patient information seeking behaviours when communicating with doctors. *Medical Care*. 1990; Vol. 28, No. 1: 19-28
7. Cegala D, Marinelli T and Post D. The effect of patient communication skills training on compliance. *Archives of Family Medicine*. 2000; 9: 957-964.
8. Street R.L. and Millay B. Analysing patient participation in medical encounters. *Health Communication*. 2001; Vol. 13, Issue 1: 61-73

- 1  
2  
3 9. Frankel R, Talking in interviews: a dispreference for patient initiated questions in  
4  
5 physician-patient encounters. In Psathas G, (ed.) Interaction Competence. Lanham, MD:  
6  
7 University Press of America, 1990: 231-261  
8  
9
- 10  
11 10. Cegala D, Street R.L., and Clinch R.C. The impact of patient participation on physicians'  
12  
13 information provision during a primary care medical interview. Health Communication,  
14  
15 2007; Vol. 21, Issue 2: 177-185.  
16
- 17  
18 11. Butow P.N. et al. Oncologists reactions to cancer patients' verbal cues. Psycho-oncology.  
19  
20 Vol. 11, Issue 1 2002; 47-58.  
21
- 22  
23 12. Eggly S. et al. Information seeking during "bad news" oncology interactions: Question  
24  
25 asking by patients and their companions. Social Science and Medicine, 2006; 63: 2974-  
26  
27 2985.  
28
- 29  
30 13. Eggly S. et al. Variation in question asking during cancer clinical interactions: A  
31  
32 potential source of disparities in access to information. Patient Education and  
33  
34 Counselling, 2011; Vol. 82, Issue 1: 63-68.  
35
- 36  
37 14. Brown R, Butow PN, Boyer MJ and Tattersall MHN. Promoting patient participation in  
38  
39 the cancer consultation: evaluation of a prompt sheet and coaching in question asking.  
40  
41 British Journal of Cancer 1999; Vol. 80: 242-248  
42
- 43  
44 15. Dimoska A, Tattersall M.H.N, Butow PN, Shepherd H. Can a "prompt list" empower  
45  
46 cancer patients to ask relevant questions. Cancer 2008; Vol. 113, Issue 2: 225-237.  
47
- 48  
49 16. Butow PN, Dunn SM, Tattersall MHN, and Jones QJ. Computer-based interaction  
50  
51 analysis of the cancer consultation. British Journal of Cancer 1995; Vol. 71: 1115-1121.  
52  
53  
54  
55  
56  
57  
58  
59  
60

- 1  
2  
3  
4  
5  
6  
7  
8  
9  
10  
11  
12  
13  
14  
15  
16  
17  
18  
19  
20  
21  
22  
23  
24  
25  
26  
27  
28  
29  
30  
31  
32  
33  
34  
35  
36  
37  
38  
39  
40  
41  
42  
43  
44  
45  
46  
47  
48  
49  
50  
51  
52  
53  
54  
55  
56  
57  
58  
59  
60
17. Street RL Information giving in medical consultations: The influence of patients' communicative styles and personal characteristics. *Social Science and Medicine* 1991; Vol 32. Issue 5: 541-548.
  18. Street RL, Gordon HS, Ward MM, Krupat E, Kravitz RL. Patient participation in medical consultations: Why some patients are more involved than others. *Medical Care* 2005; Vol 43, No. 10: 960-969.
  19. Collins S, Drew P, Watt I, and Entwistle V. 'Unilateral' and 'bilateral' practitioner approaches in decision-making about treatment. *Social Science and Medicine* 2005; 61: 2611-2627.
  20. Perakyla A, Communicating and responding to diagnosis in Heritage J, and Maynard D. (eds.) *Communication in Medical Care*. 2006: 214-247.
  21. Pomerantz A, and E. Sean Rintel. Practices for reporting and responding to test results during medical consultations: enacting the roles of paternalism and independent expertise. *Discourse Studies* 2004; Vol. 6 (1): 9-26.
  22. Heritage J, and Maynard D. *Communication in Medical Care: Interaction between Primary Care Physicians and Patients*. 2006. Cambridge: Cambridge University Press.

### Copyright/licence for publication

“The Corresponding Author has the right to grant on behalf of all authors and does grant on behalf of all authors, a [worldwide licence](#) to the Publishers and its licensees in perpetuity, in all forms, formats and media (whether known now or created in the future), to i) publish, reproduce, distribute, display and store the Contribution, ii) translate the Contribution into other languages, create adaptations, reprints, include within collections and create summaries, extracts and/or, abstracts of the Contribution, iii) create any other derivative work(s) based on the Contribution, iv) to exploit all subsidiary rights in the Contribution, v) the inclusion of electronic links from the Contribution to third party material where-ever it may be located; and, vi) licence any third party to do any or all of the above.”

### Competing interests

All authors have completed the ICMJE uniform disclosure form at [www.icmje.org/coi\\_disclosure.pdf](http://www.icmje.org/coi_disclosure.pdf) (available on request from the corresponding author) and declare: no support from any organisation for the submitted work; no financial relationships with any organisations that might have an interest in the submitted work in the previous three years; no other relationships or activities that could appear to have influenced the submitted work."

### Contributorship statement

All authors contributed to the research study. As PI AT led the study design with contributions from GM and LF. GM and LF led the data collection and analysis with contributions from AT. The first draft of the paper was prepared by GM and then subsequently all authors contributed to data interpretation and revisions to the manuscript. All authors had full access to the data derived from the study and can take full responsibility for the integrity of the data and the accuracy of the data analysis.

### Data sharing

There is no additional data available

### Ethics approval

This paper is an outcome from a study funded by the NIHR Research for Patient Benefit Programme. The funding body did not partake in the design of the study, collection, analysis and interpretation of data, writing and submission of the article for publication. The study received ethical approval from the Nottingham research ethics committee 2 ID: 09/H0408/34. All participants in the study gave informed consent before taking part. All authors are independent

1  
2  
3 from the funding body. Each had had full access to all of the data in the study and can take  
4 responsibility for the integrity of the data and the accuracy of the data analysis  
5  
6

7 This paper presents independent research funded by the National Institute for Health Research  
8 (NIHR) under its Research for Patient Benefit (RfPB) Programme (Grant Reference Number PB-  
9 PG-0807-14122). The views expressed are those of the author(s) and not necessarily those of the  
10 NHS, the NIHR or the Department of Health.  
11  
12  
13  
14  
15  
16  
17  
18  
19  
20  
21  
22  
23  
24  
25  
26  
27  
28  
29  
30  
31  
32  
33  
34  
35  
36  
37  
38  
39  
40  
41  
42  
43  
44  
45  
46  
47  
48  
49  
50  
51  
52  
53  
54  
55  
56  
57  
58  
59  
60

For peer review only



1  
2  
3 **Patient initiated questions: how can doctors encourage them and improve the consultation**  
4 **process? A qualitative study**  
5  
6  
7

8  
9 Dr. GM Murtagh,<sup>1</sup> Dr L Furber<sup>2</sup> Dr. AL Thomas<sup>3</sup>  
10  
11

12  
13  
14  
15  
16 <sup>1</sup> Senior Lecturer in Clinical Communication, Division of Surgery, Department of Surgery and  
17 Cancer, St Mary's Campus, Imperial College London, South Wharf Road, London W2 1BL  
18 [g.murtagh@imperial.ac.uk](mailto:g.murtagh@imperial.ac.uk)  
19  
20  
21

22  
23 <sup>2</sup> Senior Nurse Researcher, Department of Cancer Studies and Molecular Medicine  
24 Robert Knighton Clinical Sciences Building, University of Leicester, Leicester Royal Infirmary,  
25 Leicester LE2 7LX  
26  
27  
28

29  
30 <sup>3</sup> Reader and Consultant in Medical Oncology, Department of Cancer Studies and Molecular  
31 Medicine, Leicester Royal Infirmary  
32 Leicester LE 1 5WW  
33  
34  
35  
36  
37  
38

39 **Correspondence to:**  
40  
41

42 Dr. G.M. Murtagh  
43 Division of Surgery, Department of Surgery and Cancer, St Mary's Hospital,  
44 Imperial College London, South Wharf Road, London W2 1BL  
45 [g.murtagh@imperial.ac.uk](mailto:g.murtagh@imperial.ac.uk)  
46  
47  
48  
49  
50  
51

52  
53 **Manuscript word count 3,505**  
54

55 **Abstract word count: 237**  
56  
57  
58  
59  
60

## Abstract

**Objective:** To investigate the circumstances under which patients initiate direct questions in oncology consultations

**Design:** Conversation analysis of 47 consultations between oncologists and cancer patients

**Setting:** An oncology clinic at a teaching hospital in the East Midlands.

**Participants:** 16 Oncologists and 67 cancer patients

**Outcome measure:** Patient initiated direct questions

**Results:** On the whole patients' direct questions are designed to seek specific information regarding, the cancer itself, treatment options or their experience of symptoms. When patients do ask direct questions they typically follow the announcement of test results where some reference to the details of those results, is provided. More specifically, there appears to be a relation between showing the patient their scan/x-ray results, patient involvement and patient initiated direct questions. Higher levels of patient initiated direct questions were clustered around occasions where doctors provided information and explanations of test results (twelve consultations) sometimes with direct reference to scan or x-ray results (seven consultations).

**Conclusions:** This study highlights the importance of careful explanation of diagnostic evidence as a factor contributing to increased patient involvement. More specifically, the findings suggest

1  
2  
3 that, when appropriate, invoking diagnostic evidence (e.g. scan or x-ray results) is an effective  
4 way of increasing levels of patient question asking. Doctors need to be able to encourage patient  
5 question asking to ensure that patients have at their disposal an important means through which  
6 they can determine their information needs. Although these results come from a study of  
7 oncology consultations, this finding may be transferable to other clinical contexts.  
8  
9  
10  
11  
12  
13  
14  
15  
16  
17  
18  
19  
20  
21  
22  
23  
24  
25  
26  
27  
28  
29  
30  
31  
32  
33  
34  
35  
36  
37  
38  
39  
40  
41  
42  
43  
44  
45  
46  
47  
48  
49  
50  
51  
52  
53  
54  
55  
56  
57  
58  
59  
60

## Article Summary

- In cancer care patient question asking can significantly influence the provision of information from the doctor.
- The paper extends the existing research into communication in cancer care by reporting on distinctive patterns of communication behaviour which influence, in this case, patient question asking.

## Key Messages

- The frequency of direct questions initiated by patients in oncology consultations is relatively low.
- Explicating test results alongside diagnostic evidence increases the chances of patient initiated direct questions in oncology consultations.
- This finding has implications for understanding how doctors can encourage patient questions within cancer care and, potentially, other clinical settings.

## Strengths and Limitations of this study

- The strength of the study is that it targets actual instances of question asking behaviour in relation to other situational variables in the consultation.

- The study is limited by its sole reliance on audio recordings of consultations.

Consequently, other aspects of social interaction, e.g. eye contact, bodily comportment etc which can also have a significant influence on the content of the consultation, have not been included.

For peer review only

## Introduction

One of the main problems oncologists face in the consultation is the difficulty of accurately gauging the patient's information needs.<sup>1,2</sup> Studies have examined patient preferences for information provision and involvement<sup>1,3,4,5</sup> and have shown, among other things, that patients do want specific information concerning their illness.<sup>4,5</sup> However, patients' information needs are not static and there can be significant variations between patients in terms of their preferences for the timing, content and detail of information they require. Such variations may change during the course of an illness and even during the course of a single consultation depending on the type of information a patient receives.<sup>1</sup> Consequently, patients' attempts to elicit information from doctors also varies. These contingencies indicate a real need to understand more about the conditions under which patients actively seek information and, more specifically, the kinds of communication behaviours patients use to seek out information. Among these behaviours, question asking is key, as it can be used as a basic form of information seeking.<sup>6</sup> When patients ask questions it allows them to shape their own levels of involvement<sup>8</sup> and handle the contingencies of information exchange.<sup>9</sup> In addition, patient question asking has been linked to improved information provision.<sup>8,10</sup> Moreover, patients who receive an answer to their question demonstrate better psychological adjustment following the consultation than those who ask questions but don't receive a response.<sup>16,17</sup>

1  
2  
3 These findings still beg the question, how and when do patients ask questions? In the context of  
4 cancer care, studies have shown that direct questions (alongside indirect cues) occur most often  
5 during the treatment phase of the consultation<sup>11</sup>; that companions who accompany patients, tend  
6 to ask more questions than patients particularly in relation to treatment and diagnosis<sup>12</sup>; that  
7 ethnic and racial differences between patients can reflect differences in levels of question asking  
8 and direct question asking<sup>13</sup>; that question prompt lists can encourage patient question asking  
9 particularly in relation to prognosis and diagnosis.<sup>14,15</sup>  
10  
11  
12  
13  
14  
15  
16  
17  
18  
19

20  
21  
22  
23  
24 These studies provide valuable direction in understanding some of the factors behind patient  
25 question asking in cancer care. However, there is still a lot that is unknown about the specific  
26 situational variables which underpin and shape patient question asking in relation to the doctor's  
27 communication behaviours. The extent to which patients initiate information seeking, in the first  
28 place, is often contingent on the doctor's communicative style. The import of this lies in the fact  
29 that when patients seek information (e.g. through asking questions), doctors typically respond in  
30 more informative and accommodative ways,<sup>18</sup> simply because patient questions are one of the  
31 ways in which patients establish their information needs. The purpose of this study was to  
32 capture the interactional and situational variables that occur alongside patient initiated questions  
33 to establish how and when patients are more inclined to initiate direct questions.  
34  
35  
36  
37  
38  
39  
40  
41  
42  
43  
44  
45  
46  
47  
48  
49  
50  
51  
52  
53  
54  
55  
56  
57  
58  
59  
60

## Methods

The study was carried out in a large UK Cancer Centre. LF recruited patients (with different types of cancers) attending the oncology department (n=77) as well as a mix of oncology consultants and specialist registrars. Both newly diagnosed and follow up patients were recruited to ensure maximum variability in our sample group. Following each consultation patients were invited to complete a satisfaction questionnaire and interviews were conducted with the patients by LF shortly after their consultation. **Each of the interviews were analysed to identify common themes across the data until saturation was reached. Patient consent was obtained before their consultation was recorded and before collecting questionnaire data. This paper reports on the recordings of the consultation data only.**

We audio recorded 47 consultations which were then transcribed and analysed using conversation analysis,<sup>22</sup> a method of analysis which details characteristics of speech exchange including pauses, pace and intonation etc (the transcription symbols used to indicate these characteristics are provided in table 1). **In each consultation we identified the number of patient initiated questions which arose. We then examined the location of these questions which allowed us to identify clusters around diagnostic news delivery. We also noted, however, that in other consultations patient initiated questions were minimal or absent on occasions of diagnostic news discussion. This led us to question if there was a relation between the doctor's communication behaviour and the patient's response when doctor and patient talked about test results. Using this as our focal point we identified 30 of the 47 consultations where the relation between style of diagnostic news delivery.**



1  
2  
3 (elaborate/restricted) and patient response/involvement (patient initiated questions/no  
4 patient initiated questions) was most clear. The paper reports on a sample from that selection  
5  
6 of 30. Transcription and analysis was carried out by GM. Subsequent analyses were  
7  
8 carried out by GM, AT and LF. Any disagreements regarding interpretation of the data  
9  
10 were resolved through discussion and by revisiting the data. Inclusion Criteria: Patients  
11  
12 over the age of eighteen, having been diagnosed with cancer, aware of their diagnosis and  
13  
14 willing to participate in the study. Exclusion criteria: Any patient unable to consent for  
15  
16 themselves, patients with a cognitive impairment and patients who do not speak fluent  
17  
18 English.  
19  
20  
21  
22  
23  
24  
25  
26  
27

## 28 Analysis

29  
30  
31 For the purposes of analysis we defined a direct question as that which is initiated solely by the  
32  
33 patient, without a verbal prompt ('Do you have any questions?') from the doctor and which  
34  
35 targets a specific topic. The consultations were examined with a view to identifying some of the  
36  
37 systematic and recurrent properties of delivering news of test results and the patient's response.  
38  
39 More specifically, we examined how styles of news delivery shape patients' responses, in  
40  
41 particular their levels of question asking.  
42  
43  
44  
45  
46  
47  
48  
49  
50

### 51 Transcription symbols

- 52  
53 • • Talk marked by the degree sound indicates words that are softly spoken  
54  
55 (.) A full stop in brackets indicates a micro pause  
56  
57  
58  
59  
60

(1.0), (0.5) indicates silence in seconds and tenths of seconds

[Okay

[Yes Talk which is preceded by a square bracket indicates overlap in speech between two different speakers

= Talk marked with the equals sign at the end of one line and the beginning of another indicates no pause between the end of one utterance and the start of another

## Results

Our focussed sample of 30 consultations in total came to 451.30 mins, just over 7.5 hours of consultation time with the average length of the consultation at 15.04 mins. In 7 out of the 30 consultations (just under 60 mins of consultation time) **the patients did not ask any questions.** In the remaining 23 consultations there were 76 instances of patients asking questions (avg. 2.5 direct patient questions per consultation). **However patients' questions arose in different ways. For example,** in 5 out of those 23 consultations (22%) patients' questions came at the end (within 3-4 mins of the end of the consultation) **again** following a prompt from the doctor. In 6 out of the 23 consultations (26%) there is evidence of indirect or embedded questions arising at different junctures of the consultation following a prompt from the doctor. In 12 of the 23 consultations, (52%) patient initiated direct questions occur specifically in relation to discussion of test results. In 7 of these 12 consultations (58%) patient initiated question asking occurs

1  
2  
3 following a careful explanation of test results and diagnostic evidence e.g. the doctor's use of  
4 scan or x-rays. In only two consultations did the patient decline to ask a question following an  
5 invitation to do so from the doctor.  
6  
7  
8  
9

10  
11  
12 We noted a number of variations in the way in which doctors deliver test results. Our main  
13 finding, however, is that patients are more inclined to initiate direct questions when doctors  
14 deliver results with direct reference to the diagnostic evidence e.g. x-rays or scans. To exemplify  
15 this we identified two types of information delivery each resulting in different types of patient  
16 response, the most marked difference being levels of patient initiated question asking. In delivery  
17 type 1, test results were delivered in a very general way without elaboration (**Restricted delivery**  
18 - e.g. 'your scan results are fine'). With this type of delivery patient initiated questions were  
19 absent or minimal. In delivery type 2 (**Elaborate delivery** - 'your scan shows that...') the doctor  
20 elaborated or explained the test results sometimes invoking the scan or the x-ray to do so. This  
21 type of delivery typically positively influenced levels of patient involvement in the consultation  
22 and prompted more patient initiated direct questions and consequently more information  
23 provision from the doctor.  
24  
25  
26  
27  
28  
29  
30  
31  
32  
33  
34  
35  
36  
37  
38  
39  
40  
41  
42  
43  
44  
45  
46  
47  
48  
49

## 50 **Restricted delivery**

### 51 **Table 1**

#### 52 **0 patient initiated questions**

1. Doctor: The CT scan result is here (0.5) and that was
2. basically normal erm nothing to suggest any new no new
3. glands you have got some changes on your erm (4.0) lungs
4. from(.) previous radiotherapy (0.5) uhm (1.5) so that's your
5. CT scan and I'm just trying to find the (0.5) lung function
6. tests(.) when did you have those done
7. Patient: (2.0) had them done
8. Husband: Two weeks ago

## Table 2

### 0 initiated patient questions

1. Doctor: Okay (.) um (0.5) scan result was fine
2. Patient: Good
3. Doctor: Good okay an everything's stable on the in the
4. bones
5. Patient: Right

## Table 3

### 0 patient questions

1. Doctor: Your scan shows everything is the same
2. Patient: Good
3. Doctor: So that's very good

**Table 4****1 patient initiated question**

1. Doctor: And you've had an echocardiogram of your heart an
2. that's all fine
3. Patient: Is it [okay
4. Doctor: [you had that done on?
5. Patient: °Last Friday°
6. Doctor: Last Friday that's all fine (.) no problems so
7. that's good news could I er examine you

The sequences in tables 1-4 show the announcement of diagnostic results depicting the type 1 delivery. In each case the results are delivered in a general, non-specific way characterised by a general clinical assessment, 'fine', 'normal' or 'no change'. In each case this type of delivery produces a minimal response from the patient. It seems that this is partly to do with the fact that the general delivery projects a paternalistic approach where the doctor presents his/her interpretation of the results as the authoritative one, without any specific reference to further

1  
2  
3 details of the findings.<sup>21</sup> Consequently, the patient is invited to accept the diagnostic judgement  
4  
5 of the doctor and the general, non-specific explanation of the results is reflected in the general,  
6  
7 non-specific response provided by the patient.<sup>19</sup> In almost a third of the sample, apart from the  
8  
9 sequence in table 4, the patient does not question or inquire further into the results following the  
10  
11 type 1 delivery. In table 4 the patient does ask a question, but again this is presented in a general  
12  
13 form ‘is it okay?’ again reflecting the general way in which the results of the echocardiogram is  
14  
15 presented. However, later on following a physical examination the patient targets back on this  
16  
17 assessment, after a physical examination, following a prompt from the doctor.  
18  
19  
20  
21  
22  
23

- 24  
25  
26 1. Doctor: Is there anything you wanted to ask at all?  
27  
28 2. Patient: I did want to ask about my heart function  
29  
30 3. Doctor: Ya sure  
31  
32 4. Patient: I know you said the echocardiograms are oka:y  
33  
34 5. Doctor: Yes  
35  
36 6. Patient: but has it (.) erm deteriorated at all[through  
37  
38 7. Doctor: [no no  
39  
40  
41  
42  
43  
44  
45  
46  
47  
48  
49  
50  
51  
52

### 53 Elaborate delivery

### 54 Table 1

### 1patient initiated question

1. Doctor: The head scan, the CT and the MRI show that there
2. is something in the bones but what is unusual is that it
3. seems to be more on the right hand side than the left and I
4. think it was the left eye you were having problems with?
5. Patient: (0.5) Don't they cross?
6. Doctor: Well sometimes if it's more of a visual problem
7. they do cross yeah

In this sequence there are two distinctive features which appear to shape the patient's response. Firstly, the doctor delivers the findings from the scan and produces an expression of uncertainty regarding which eye the patient was having problems with. Secondly, there is a half second pause following the delivery which not only provides the patient with the opportunity to respond but also scope to negotiate the nature of that response.

### Table 2

#### 5 patient initiated questions

1. Doctor: Your scan shows that things are very much the
2. same, maybe slightly bigger but literally by 4mm both in
3. the chest and in the bowel
4. Patient: Is it possible for me to see the scan?
5. Doctor: Yes, these are your lungs, that's your heart

1  
2  
3  
4  
5  
6  
7  
8  
9  
10  
11  
12  
13  
14  
15  
16  
17  
18  
19  
20  
21  
22  
23  
24  
25  
26  
27  
28  
29  
30  
31  
32  
33  
34  
35  
36  
37  
38  
39  
40  
41  
42  
43  
44  
45  
46  
47  
48  
49  
50  
51  
52  
53  
54  
55  
56  
57  
58  
59  
60

6. Patient: Where's the tumor?

7. Doctor: That's it

8. Patient: It's there? So when I saw it previously it was

9. about that size?

10. Doctor: It's only a couple of centimetres most

11. Patient: As small as that? In fact it's smaller

12. than when I first came about walnut size

13. Doctor: It doesn't really say how big it was

14. initially

15. Patient: So it would be about like that wouldn't it?

16. Doctor: Yeah

17. Patient: It was on the lymph gland, is that the lymph

18. gland?

19. Doctor: No that's your bowel that's the tumor and

20. that's your bowel there and that's your aneurism

21. they've measured it for you 55 mm

In this sequence the results are delivered and carefully explicated with the inclusion of numerical data specifying the size of the cancerous growth (lines 1-3). This provides the patient with a precise frame of reference regarding the cancer. Interestingly in this case the patient, in response, asks to see the scan (line 4). The doctor then identifies the patient's lungs and heart providing the relevance for the proximal distance of the tumour from the lungs and heart. The patient (line 6)



1  
2  
3 then asks about the location of the tumour, its size (lines 8-9, 11) and finally asks about the  
4  
5 lymph gland (line 17-18).  
6  
7  
8  
9  
10

11 **Table 3**

12  
13  
14 **2 patient initiated questions**  
15

- 16  
17  
18 1. Doctor: The scan is very much the same erm there hasn't  
19  
20 2. been um any obvious problems there is quite a lot of  
21  
22 3. fibrosis still but that's to be expected so fibrosis is  
23  
24 4. healing and scarring  
25  
26 5. Patient: Where's that?  
27  
28  
29 6. Doctor: Umm both in the air in the central areas you know  
30  
31 7. where all the problems originally were with the  
32  
33 8. swallowing so in the central area and in the tummy um (2.0)  
34  
35 9. °let me tell you exactly°  
36  
37  
38 10. Patient: Was that there before?  
39  
40  
41 11. Doctor: They've said there's an increase in the volum  
42  
43 12. of that fibrosis  
44  
45 13. Patient: So basically that's scar tissue, is that what  
46  
47 14. you're saying?  
48  
49  
50

51  
52 This delivery of diagnostic news starts out almost as a type 1 delivery ('The scan is very much  
53  
54 the same') but then goes on to point out that fibrosis is still present which is 'to be expected'.  
55

56  
57 The doctor then explains the term fibrosis and the patient responds (line 5) by asking where it is.  
58  
59  
60

1  
2  
3 When the doctor explains the location of the fibrosis, the patient asks if it was present before.  
4  
5  
6 The doctor then refers to the report regarding the increase in fibrosis and the patient (line 13)  
7  
8 then presents a gloss of the meaning of the news which is posed as a question.  
9  
10

11 **Table 4**

12  
13  
14 **5 patient initiated questions**  
15

- 16  
17  
18 1. Doctor: So they've reported it as stable disease basically  
19  
20 2. nothing new to find there are some lymph nodes in your  
21  
22 3. pelvis but there's nothing different from that  
23  
24 4. Patient: Just where exactly?  
25  
26 5. Doctor: Did you want to look at your scan you [can  
27  
28 6. Patient: [Will I be  
29  
30 7. able to tell from that?  
31  
32 8. Doctor: Well we can look at it together  
33  
34 9. Patient: Yeah  
35  
36 10. Doctor: (3.0) So this is your pelvis  
37  
38 11. Patient: Right  
39  
40 12. Doctor: This is your right hip and that is your left  
41  
42 13. hip=  
43  
44 14. Patient: =Mhm  
45  
46 15. Doctor: And then you've got some lymph nodes that are  
47  
48 16. predominantly on the on the right hand side  
49  
50 17. Patient: Yes right so the other side is what they  
51  
52  
53  
54  
55  
56  
57  
58  
59  
60

1  
2  
3  
4  
5  
6  
7  
8  
9  
10  
11  
12  
13  
14  
15  
16  
17  
18  
19  
20  
21  
22  
23  
24  
25  
26  
27  
28  
29  
30  
31  
32

18. should look like is it?

19. Doctor: Yeah you've got some tiny lymph nodes there

20. they're normally a centimeter and a half is as big as

21. you'd expect them to be normally

22. Patient: Right

23. Doctor: You have got some higher up as well

24. Patient: So that's more into the tummy?

25. Doctor: Yeah

26. Patient: Dya think it is possible that thee enlarged

27. (.) lymph nodes could be (0.5) pressing on a ne::rve

28. [or

29. Doctor: [Sometimes they can do ya ya

33  
34  
35  
36  
37  
38  
39  
40  
41  
42  
43  
44  
45  
46  
47  
48  
49  
50  
51  
52  
53  
54  
55  
56  
57  
58  
59  
60

The diagnostic news in this delivery specifies the fact that there 'are some lymph nodes'. In response the patient asks 'where' exactly' (line 6). The doctor then asks the patient if they would like to look at their scan. Interestingly the patient's next question ('will I be able to tell from that?') at line 7 manifests the knowledge-competence gap between doctors and patients. This may partly account for why doctors do not always invite patients to look at scan/x-ray results and why patients do not always ask to see them when they are available. The doctor's response ('we can look at it together') bridges this gap by inviting the patient to examine the scan jointly allowing the doctor to identify, for the patient, key anatomical structures whilst also allowing the patient to inquire further.

1  
2  
3 The sequences in tables 1-4 show the announcement of diagnostic results depicting the type 2  
4 delivery. In these sequences the results are delivered alongside a clinical assessment which either  
5 includes a numerical reading or further explication of the findings. When results are delivered in  
6 this way, patients tend to engage with the doctor. An important consequence of this is higher  
7 levels of patient involvement including more patient initiated questions.  
8  
9  
10  
11  
12  
13  
14  
15  
16  
17  
18  
19

## 20 Discussion

21  
22  
23  
24  
25 In the main, consultations covered topics such as treatment, the progression of the cancer itself  
26 and the symptoms experienced by the patient. Not all topics were addressed in every consultation  
27 and doctors varied in how they dealt with each topic. We found that generally patients' actual  
28 levels of involvement in the consultation were relatively low and patients varied in how active  
29 they were in seeking information. We also found that, on the whole, patients seemed disinclined  
30 to ask questions or show communication behaviours designed to elicit information. This finding  
31 is consistent with much earlier research into this topic.<sup>6,17</sup>  
32  
33  
34  
35  
36  
37  
38  
39  
40  
41  
42  
43  
44

45 In relation to discussions of test results between doctor and patient, the data appear to indicate  
46 that there may be a connection between the way in which the results are delivered and the  
47 occurrence of patient initiated direct questions. That is to say, the plainer announcement of  
48 diagnostic results ('your scan is fine' - Type 1), which does not include sharing the diagnostic  
49 evidence projects a more paternalistic approach implicit in which, the patient is expected to  
50 accept the diagnostic judgement of the doctor. It is also characterised by a general explanation of  
51  
52  
53  
54  
55  
56  
57  
58  
59  
60

1  
2  
3 the results which is reflected in the general response provided by the patient.<sup>19</sup> In contrast the  
4  
5 Type 2 delivery is much more accommodative of patient input. Moreover, the invocation of the  
6  
7 scan or the x-ray, where appropriate, appears to be significant in encouraging patient  
8  
9 involvement and consequently patient initiated direct questions. Incorporating and explaining the  
10  
11 evidence appears to be interpreted by patients as an opportunity to contribute to the consultation  
12  
13 and establish their information needs in an environment within which the patient's  
14  
15 queries/opinions are welcomed. Unless the patient has specifically requested not to see scans or  
16  
17 x-rays, this would appear to be an effective way of encouraging patient involvement generally  
18  
19 and increasing levels of patient question asking. Consequently, patients are then able to establish  
20  
21 and satisfy their information needs in a timely and effective way.  
22  
23  
24  
25  
26  
27  
28

29 In cases where patients did ask more questions, there was no significant increase in consultation  
30  
31 length and no patient refused the offer of looking at examination results. The examples presented  
32  
33 above were carefully selected because they display the most marked variation in consultation  
34  
35 style highlighting clear contrasts between the two types of delivery.  
36  
37  
38  
39  
40

41 A number of different types of intervention have been used in cancer care to help facilitate  
42  
43 patient involvement. For example, question prompt lists have been used quite widely, but their  
44  
45 actual implementation in consultations is not always straightforward and their rates of success do  
46  
47 vary.<sup>15</sup> Moreover, we found in our study, that even when patients entered the consultation with  
48  
49 question lists, they often left the consultation without having asked the questions they came  
50  
51 prepared for.  
52  
53  
54  
55  
56  
57  
58  
59  
60

1  
2  
3 The finding that when the doctor elaborates or explicates findings from the evidence, this can  
4 increase levels of patient involvement has been identified previously in a study of primary care  
5 consultations.<sup>20</sup> Clearly there are important differences between an oncology consultation and a  
6 primary care consultation. However, in relation to consulting behaviours, in both settings there  
7 appear to be striking similarities. That is to say, careful explication of diagnostic findings can  
8 encourage patient involvement such as, in this case, question asking, which in turn can enable  
9 patients to establish their information needs. Further research in this area demands a closer  
10 investigation of what Frankel<sup>9</sup> has described as the ‘presuppositional grounds upon which the  
11 communication situation itself rests’. This would then allow us to identify other consulting  
12 behaviours doctors can utilise to encourage patient involvement.  
13  
14  
15  
16  
17  
18  
19  
20  
21  
22  
23  
24  
25  
26  
27  
28

29 There may be a number of reasons why patients are disinclined to ask questions following the  
30 ‘your scan result is fine’ type of announcement. The minimal responses identified may not  
31 actually be conditioned solely by the type of announcement of test results but may also be a  
32 consequence of patient preference or information needs at that particular moment. As noted, in  
33 Type 1, table 4 the patient targets back on a general assessment of the echocardiogram as ‘okay’.  
34  
35  
36  
37  
38  
39 This clearly merits further empirical investigation.  
40  
41  
42  
43  
44  
45  
46  
47  
48  
49  
50  
51  
52

## 53 **Conclusion**

54  
55  
56  
57  
58  
59  
60

1  
2  
3 Currently there is good research evidence indicating that patient initiated question asking should  
4  
5 be encouraged. Doctors need to be able to encourage patient question asking to ensure that  
6  
7 patients have at their disposal an important means through which they can determine and express  
8  
9 their information needs. This study confirms the findings from previous studies showing that  
10  
11 levels of patient initiated questions in Oncology are relatively low. Our study suggests that  
12  
13 patient initiated question asking can be encouraged through timely and deliberate information  
14  
15 giving which incorporates an explanation and display of test results. The findings at this stage are  
16  
17 only suggestive and further exploration is required to establish their actual significance. Studies  
18  
19 which involve closer examination of the actual interactional episodes between doctors and  
20  
21 patients are required to provide a deeper understanding of patient initiated questions and the  
22  
23 situational variables which may influence them.  
24  
25  
26  
27  
28  
29  
30  
31  
32  
33  
34  
35  
36  
37  
38  
39  
40  
41  
42  
43  
44  
45  
46  
47  
48  
49  
50  
51  
52  
53  
54  
55  
56  
57  
58  
59  
60

## References

1. Butow P.N., Maclean M, Dunn S.M., Tattersall M.H.N., Boyer M.J. The dynamics of change: Cancer patients' preferences for information, involvement and support. *Annals of Oncology* 1997; 8: 857-863.
2. Gattellari M, Butow P.N., Tattersall M.H.N. Sharing decisions in cancer care. *Social Science and Medicine* 2001; 52: 1865-1878.
3. Leydon G.M., Boulton M, Moynihan C, Jones A, Mossman J, Boudioni M, et al. Cancer patients' information needs and information seeking behaviour: in-depth interview study. *BMJ* 2000; 320: 909-913.
4. Jenkins V., Fallowfield L., Saul J. Information needs of patients with cancer: results from a large study in UK cancer centres. *British Journal of Cancer* 2001; 84: 48-51.
5. Cox A., Jenkins V., Catt S., Langridge C., and Fallowfield L. Information needs and experiences: An audit of UK cancer patients. *European Journal of Oncology Nursing*. 2006; Vol. 10 Issue 4 263-272.
6. Beisecker A.E. and Beisecker T.D. Patient information seeking behaviours when communicating with doctors. *Medical Care*. 1990; Vol. 28, No. 1: 19-28
7. Cegala D, Marinelli T and Post D. The effect of patient communication skills training on compliance. *Archives of Family Medicine*. 2000; 9: 957-964.
8. Street R.L. and Millay B. Analysing patient participation in medical encounters. *Health Communication*. 2001; Vol. 13, Issue 1: 61-73



- 1  
2  
3 9. Frankel R, Talking in interviews: a dispreference for patient initiated questions in  
4  
5 physician-patient encounters. In Psathas G, (ed.) Interaction Competence. Lanham, MD:  
6  
7 University Press of America, 1990: 231-261  
8  
9
- 10  
11 10. Cegala D, Street R.L., and Clinch R.C. The impact of patient participation on physicians'  
12  
13 information provision during a primary care medical interview. Health Communication,  
14  
15 2007; Vol. 21, Issue 2: 177-185.  
16
- 17  
18 11. Butow P.N. et al. Oncologists reactions to cancer patients' verbal cues. Psycho-oncology.  
19  
20 Vol. 11, Issue 1 2002; 47-58.  
21
- 22  
23 12. Eggly S. et al. Information seeking during "bad news" oncology interactions: Question  
24  
25 asking by patients and their companions. Social Science and Medicine, 2006; 63: 2974-  
26  
27 2985.  
28
- 29  
30 13. Eggly S. et al. Variation in question asking during cancer clinical interactions: A  
31  
32 potential source of disparities in access to information. Patient Education and  
33  
34 Counselling, 2011; Vol. 82, Issue 1: 63-68.  
35
- 36  
37 14. Brown R, Butow PN, Boyer MJ and Tattersall MHN. Promoting patient participation in  
38  
39 the cancer consultation: evaluation of a prompt sheet and coaching in question asking.  
40  
41 British Journal of Cancer 1999; Vol. 80: 242-248  
42
- 43  
44 15. Dimoska A, Tattersall M.H.N, Butow PN, Shepherd H. Can a "prompt list" empower  
45  
46 cancer patients to ask relevant questions. Cancer 2008; Vol. 113, Issue 2: 225-237.  
47
- 48  
49 16. Butow PN, Dunn SM, Tattersall MHN, and Jones QJ. Computer-based interaction  
50  
51 analysis of the cancer consultation. British Journal of Cancer 1995; Vol. 71: 1115-1121.  
52  
53  
54  
55  
56  
57  
58  
59  
60

- 1  
2  
3  
4  
5  
6  
7  
8  
9  
10  
11  
12  
13  
14  
15  
16  
17  
18  
19  
20  
21  
22  
23  
24  
25  
26  
27  
28  
29  
30  
31  
32  
33  
34  
35  
36  
37  
38  
39  
40  
41  
42  
43  
44  
45  
46  
47  
48  
49  
50  
51  
52  
53  
54  
55  
56  
57  
58  
59  
60  
17. Street RL Information giving in medical consultations: The influence of patients' communicative styles and personal characteristics. *Social Science and Medicine* 1991; Vol 32. Issue 5: 541-548.
18. Street RL, Gordon HS, Ward MM, Krupat E, Kravitz RL. Patient participation in medical consultations: Why some patients are more involved than others. *Medical Care* 2005; Vol 43, No. 10: 960-969.
19. Collins S, Drew P, Watt I, and Entwistle V. 'Unilateral' and 'bilateral' practitioner approaches in decision-making about treatment. *Social Science and Medicine* 2005; 61: 2611-2627.
20. Perakyla A, Communicating and responding to diagnosis in Heritage J, and Maynard D. (eds.) *Communication in Medical Care*. 2006: 214-247.
21. Pomerantz A, and E. Sean Rintel. Practices for reporting and responding to test results during medical consultations: enacting the roles of paternalism and independent expertise. *Discourse Studies* 2004; Vol. 6 (1): 9-26.
22. Heritage J, and Maynard D. *Communication in Medical Care: Interaction between Primary Care Physicians and Patients*. 2006. Cambridge: Cambridge University Press.

### Copyright/licence for publication

“The Corresponding Author has the right to grant on behalf of all authors and does grant on behalf of all authors, a [worldwide licence](#) to the Publishers and its licensees in perpetuity, in all forms, formats and media (whether known now or created in the future), to i) publish, reproduce, distribute, display and store the Contribution, ii) translate the Contribution into other languages, create adaptations, reprints, include within collections and create summaries, extracts and/or, abstracts of the Contribution, iii) create any other derivative work(s) based on the Contribution, iv) to exploit all subsidiary rights in the Contribution, v) the inclusion of electronic links from the Contribution to third party material where-ever it may be located; and, vi) licence any third party to do any or all of the above.”

### Competing interests

All authors have completed the ICMJE uniform disclosure form at [www.icmje.org/coi\\_disclosure.pdf](http://www.icmje.org/coi_disclosure.pdf) (available on request from the corresponding author) and declare: no support from any organisation for the submitted work; no financial relationships with any organisations that might have an interest in the submitted work in the previous three years; no other relationships or activities that could appear to have influenced the submitted work."

### Contributorship statement

All authors contributed to the research study. As PI AT led the study design with contributions from GM and LF. GM and LF led the data collection and analysis with contributions from AT. The first draft of the paper was prepared by GM and then subsequently all authors contributed to data interpretation and revisions to the manuscript. All authors had full access to the data derived from the study and can take full responsibility for the integrity of the data and the accuracy of the data analysis.

### Data sharing

There is no additional data available

### Ethics approval

This paper is an outcome from a study funded by the NIHR Research for Patient Benefit Programme. The funding body did not partake in the design of the study, collection, analysis and interpretation of data, writing and submission of the article for publication. The study received ethical approval from the Nottingham research ethics committee 2 ID: 09/H0408/34. All participants in the study gave informed consent before taking part. All authors are independent

1  
2  
3 from the funding body. Each had had full access to all of the data in the study and can take  
4 responsibility for the integrity of the data and the accuracy of the data analysis  
5  
6

7 This paper presents independent research funded by the National Institute for Health Research  
8 (NIHR) under its Research for Patient Benefit (RfPB) Programme (Grant Reference Number PB-  
9 PG-0807-14122). The views expressed are those of the author(s) and not necessarily those of the  
10 NHS, the NIHR or the Department of Health.  
11  
12  
13  
14  
15  
16  
17  
18  
19  
20  
21  
22  
23  
24  
25  
26  
27  
28  
29  
30  
31  
32  
33  
34  
35  
36  
37  
38  
39  
40  
41  
42  
43  
44  
45  
46  
47  
48  
49  
50  
51  
52  
53  
54  
55  
56  
57  
58  
59  
60

For peer review only

# Please wait...

If this message is not eventually replaced by the proper contents of the document, your PDF viewer may not be able to display this type of document.

You can upgrade to the latest version of Adobe Reader for Windows®, Mac, or Linux® by visiting <http://www.adobe.com/products/acrobat/readstep2.html>.

For more assistance with Adobe Reader visit <http://www.adobe.com/support/products/acrreader.html>.

Windows is either a registered trademark or a trademark of Microsoft Corporation in the United States and/or other countries. Mac is a trademark of Apple Inc., registered in the United States and other countries. Linux is the registered trademark of Linus Torvalds in the U.S. and other countries.

# Please wait...

If this message is not eventually replaced by the proper contents of the document, your PDF viewer may not be able to display this type of document.

You can upgrade to the latest version of Adobe Reader for Windows®, Mac, or Linux® by visiting [http://www.adobe.com/go/reader\\_download](http://www.adobe.com/go/reader_download).

For more assistance with Adobe Reader visit <http://www.adobe.com/go/acrreader>.

Windows is either a registered trademark or a trademark of Microsoft Corporation in the United States and/or other countries. Mac is a trademark of Apple Inc., registered in the United States and other countries. Linux is the registered trademark of Linus Torvalds in the U.S. and other countries.

# Please wait...

If this message is not eventually replaced by the proper contents of the document, your PDF viewer may not be able to display this type of document.

You can upgrade to the latest version of Adobe Reader for Windows®, Mac, or Linux® by visiting [http://www.adobe.com/go/reader\\_download](http://www.adobe.com/go/reader_download).

For more assistance with Adobe Reader visit <http://www.adobe.com/go/acrreader>.

Windows is either a registered trademark or a trademark of Microsoft Corporation in the United States and/or other countries. Mac is a trademark of Apple Inc., registered in the United States and other countries. Linux is the registered trademark of Linus Torvalds in the U.S. and other countries.

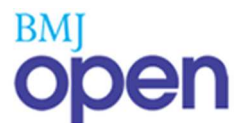

**Patient initiated questions: how can doctors encourage them and improve the consultation process? A qualitative study**

|                                                                                                                                                                                                                                                 |                                                                                                                                                                                                                                                         |
|-------------------------------------------------------------------------------------------------------------------------------------------------------------------------------------------------------------------------------------------------|---------------------------------------------------------------------------------------------------------------------------------------------------------------------------------------------------------------------------------------------------------|
| Journal:                                                                                                                                                                                                                                        | <i>BMJ Open</i>                                                                                                                                                                                                                                         |
| Manuscript ID:                                                                                                                                                                                                                                  | bmjopen-2013-003112.R3                                                                                                                                                                                                                                  |
| Article Type:                                                                                                                                                                                                                                   | Research                                                                                                                                                                                                                                                |
| Date Submitted by the Author:                                                                                                                                                                                                                   | 10-Jul-2013                                                                                                                                                                                                                                             |
| Complete List of Authors:                                                                                                                                                                                                                       | Murtagh, Ged; Imperial College London, Surgery and Cancer<br>Furber, Lynn; University of Leicester, Department of Cancer Studies and Molecular Medicine<br>Thomas, Anne; Leicester Royal Infirmary, Department of Cancer Studies and Molecular Medicine |
| <b>Primary Subject Heading</b>:                                                                                                                                                                                                                 | Communication                                                                                                                                                                                                                                           |
| Secondary Subject Heading:                                                                                                                                                                                                                      | Oncology                                                                                                                                                                                                                                                |
| Keywords:                                                                                                                                                                                                                                       | QUALITATIVE RESEARCH, ONCOLOGY, MEDICAL EDUCATION & TRAINING                                                                                                                                                                                            |
| <p>Note: The following files were submitted by the author for peer review, but cannot be converted to PDF. You must view these files (e.g. movies) online.</p> <p>New_patients1.3approved[1].docm<br/>Follow_up_patients1.3approved[1].docm</p> |                                                                                                                                                                                                                                                         |

SCHOLARONE™  
Manuscripts



1  
2  
3 **Patient initiated questions: how can doctors encourage them and improve the consultation**  
4 **process? A qualitative study**  
5  
6  
7

8  
9 Dr. GM Murtagh,<sup>1</sup> Dr L Furber<sup>2</sup> Dr. AL Thomas<sup>3</sup>  
10  
11

12  
13  
14  
15  
16 <sup>1</sup> Senior Lecturer in Clinical Communication, Division of Surgery, Department of Surgery and  
17 Cancer, St Mary's Campus, Imperial College London, South Wharf Road, London W2 1BL  
18 [g.murtagh@imperial.ac.uk](mailto:g.murtagh@imperial.ac.uk)  
19  
20  
21

22  
23 <sup>2</sup> Senior Nurse Researcher, Department of Cancer Studies and Molecular Medicine  
24 Robert Knighton Clinical Sciences Building, University of Leicester, Leicester Royal Infirmary,  
25 Leicester LE2 7LX  
26  
27  
28

29  
30 <sup>3</sup> Reader and Consultant in Medical Oncology, Department of Cancer Studies and Molecular  
31 Medicine, Leicester Royal Infirmary  
32 Leicester LE 1 5WW  
33  
34  
35  
36  
37  
38

39 **Correspondence to:**  
40  
41

42 Dr. G.M. Murtagh  
43 Division of Surgery, Department of Surgery and Cancer, St Mary's Hospital,  
44 Imperial College London, South Wharf Road, London W2 1BL  
45  
46 [g.murtagh@imperial.ac.uk](mailto:g.murtagh@imperial.ac.uk)  
47  
48  
49  
50  
51

52  
53 **Manuscript word count 3,505**  
54

55 **Abstract word count: 237**  
56  
57  
58  
59  
60

## Abstract

**Objective:** To investigate the circumstances under which patients initiate direct questions in oncology consultations

**Design:** Conversation analysis of 47 consultations between oncologists and cancer patients

**Setting:** An oncology clinic at a teaching hospital in the East Midlands.

**Participants:** 16 Oncologists and 67 cancer patients

**Outcome measure:** Patient initiated direct questions

**Results:** On the whole patients' direct questions are designed to seek specific information regarding, the cancer itself, treatment options or their experience of symptoms. When patients do ask direct questions they typically follow the announcement of test results where some reference to the details of those results, is provided. More specifically, there appears to be a relation between showing the patient their scan/x-ray results, patient involvement and patient initiated direct questions. Higher levels of patient initiated direct questions were clustered around occasions where doctors provided information and explanations of test results (twelve consultations) sometimes with direct reference to scan or x-ray results (seven consultations).

**Conclusions:** This study highlights the importance of careful explanation of diagnostic evidence as a factor contributing to increased patient involvement. More specifically, the findings suggest

1  
2  
3 that, when appropriate, invoking diagnostic evidence (e.g. scan or x-ray results) is an effective  
4  
5 way of increasing levels of patient question asking. Doctors need to be able to encourage patient  
6  
7 question asking to ensure that patients have at their disposal an important means through which  
8  
9 they can determine their information needs. Although these results come from a study of  
10  
11 oncology consultations, this finding may be transferable to other clinical contexts.  
12  
13  
14  
15  
16  
17  
18  
19  
20  
21  
22  
23  
24  
25  
26  
27  
28  
29  
30  
31  
32  
33  
34  
35  
36  
37  
38  
39  
40  
41  
42  
43  
44  
45  
46  
47  
48  
49  
50  
51  
52  
53  
54  
55  
56  
57  
58  
59  
60

## Article Summary

- In cancer care patient question asking can significantly influence the provision of information from the doctor.
- The paper extends the existing research into communication in cancer care by reporting on distinctive patterns of communication behaviour which influence, in this case, patient question asking.

## Key Messages

- The frequency of direct questions initiated by patients in oncology consultations is relatively low.
- Explicating test results alongside diagnostic evidence increases the chances of patient initiated direct questions in oncology consultations.
- This finding has implications for understanding how doctors can encourage patient questions within cancer care and, potentially, other clinical settings.

## Strengths and Limitations of this study

- The strength of the study is that it targets actual instances of question asking behaviour in relation to other situational variables in the consultation.

- The study is limited by its sole reliance on audio recordings of consultations.

Consequently, other aspects of social interaction, e.g. eye contact, bodily comportment etc which can also have a significant influence on the content of the consultation, have not been included.

For peer review only

## Introduction

One of the main problems oncologists face in the consultation is the difficulty of accurately gauging the patient's information needs.<sup>1,2</sup> Studies have examined patient preferences for information provision and involvement<sup>1,3,4,5</sup> and have shown, among other things, that patients do want specific information concerning their illness.<sup>4,5</sup> However, patients' information needs are not static and there can be significant variations between patients in terms of their preferences for the timing, content and detail of information they require. Such variations may change during the course of an illness and even during the course of a single consultation depending on the type of information a patient receives.<sup>1</sup> Consequently, patients' attempts to elicit information from doctors also varies. These contingencies indicate a real need to understand more about the conditions under which patients actively seek information and, more specifically, the kinds of communication behaviours patients use to seek out information. Among these behaviours, question asking is key, as it can be used as a basic form of information seeking.<sup>6</sup> When patients ask questions it allows them to shape their own levels of involvement<sup>8</sup> and handle the contingencies of information exchange.<sup>9</sup> In addition, patient question asking has been linked to improved information provision.<sup>8,10</sup> Moreover, patients who receive an answer to their question demonstrate better psychological adjustment following the consultation than those who ask questions but don't receive a response.<sup>16,17</sup>

1  
2  
3 These findings still beg the question, how and when do patients ask questions? In the context of  
4 cancer care, studies have shown that direct questions (alongside indirect cues) occur most often  
5 during the treatment phase of the consultation<sup>11</sup>; that companions who accompany patients, tend  
6 to ask more questions than patients particularly in relation to treatment and diagnosis<sup>12</sup>; that  
7 ethnic and racial differences between patients can reflect differences in levels of question asking  
8 and direct question asking<sup>13</sup>; that question prompt lists can encourage patient question asking  
9 particularly in relation to prognosis and diagnosis.<sup>14,15</sup>  
10  
11  
12  
13  
14  
15  
16  
17  
18  
19

20  
21  
22  
23  
24 These studies provide valuable direction in understanding some of the factors behind patient  
25 question asking in cancer care. However, there is still a lot that is unknown about the specific  
26 situational variables which underpin and shape patient question asking in relation to the doctor's  
27 communication behaviours. The extent to which patients initiate information seeking, in the first  
28 place, is often contingent on the doctor's communicative style. The import of this lies in the fact  
29 that when patients seek information (e.g. through asking questions), doctors typically respond in  
30 more informative and accommodative ways,<sup>18</sup> simply because patient questions are one of the  
31 ways in which patients establish their information needs. The purpose of this study was to  
32 capture the interactional and situational variables that occur alongside patient initiated questions  
33 to establish how and when patients are more inclined to initiate direct questions.  
34  
35  
36  
37  
38  
39  
40  
41  
42  
43  
44  
45  
46  
47  
48  
49  
50  
51  
52  
53  
54  
55  
56  
57  
58  
59  
60

## Methods

The study was carried out in a large UK Cancer Centre. LF recruited patients (with different types of cancers) attending the oncology department (n=77) as well as a mix of oncology consultants and specialist registrars. Both newly diagnosed and follow up patients were recruited to ensure maximum variability in our sample group. Following each consultation patients were invited to complete a satisfaction questionnaire and interviews were conducted with the patients by LF shortly after their consultation. **Each of the interviews were analysed to identify common themes across the data until saturation was reached. Patient consent was obtained before their consultation was recorded and before collecting questionnaire data. This paper reports on the recordings of the consultation data only.**

We audio recorded 47 consultations which were then transcribed and analysed using conversation analysis,<sup>22</sup> a method of analysis which details characteristics of speech exchange including pauses, pace and intonation etc (the transcription symbols used to indicate these characteristics are provided in table 1). **In each consultation we identified the number of patient initiated questions which arose. We then examined the location of these questions which allowed us to identify clusters around diagnostic news delivery. We also noted, however, that in other consultations patient initiated questions were minimal or absent on occasions of diagnostic news discussion. This led us to question if there was a relation between the doctor's communication behaviour and the patient's response when doctor and patient talked about test results. Using this as our focal point we identified 30 of the 47 consultations where the relation between style of diagnostic news delivery**



1  
2  
3 (elaborate/restricted) and patient response/involvement (patient initiated questions/no  
4 patient initiated questions) was most clear. From this sample of 30 we selected 8 examples  
5  
6 (discussed below) which in our view provided the strongest indication of how the style of  
7  
8 delivery of news/results can influence patient involvement/questions. This sample of 8 also  
9  
10 allows us to demonstrate most clearly the contrast between the two different styles of  
11  
12 delivery, restricted and elaborate. Transcription and analysis was carried out by GM.  
13  
14 Subsequent analyses were carried out by GM, AT and LF. Any disagreements regarding  
15  
16 interpretation of the data were resolved through discussion and by revisiting the data.  
17  
18 **Inclusion Criteria:** Patients over the age of eighteen, having been diagnosed with cancer,  
19  
20 aware of their diagnosis and willing to participate in the study. **Exclusion criteria:** Any  
21  
22 patient unable to consent for themselves, patients with a cognitive impairment and patients  
23  
24 who do not speak fluent English.  
25  
26  
27  
28  
29  
30  
31  
32  
33  
34

### 35 Analysis

36  
37  
38 For the purposes of analysis we defined a direct question as that which is initiated solely by the  
39  
40 patient, without a verbal prompt ('Do you have any questions?') from the doctor and which  
41  
42 targets a specific topic. The consultations were examined with a view to identifying some of the  
43  
44 systematic and recurrent properties of delivering news of test results and the patient's response.  
45  
46 More specifically, we examined how styles of news delivery shape patients' responses, in  
47  
48 particular their levels of question asking.  
49  
50  
51  
52  
53  
54  
55  
56  
57  
58  
59  
60

### Transcription symbols

- ◦           Talk marked by the degree sound indicates words that are softly spoken
- (.)            A full stop in brackets indicates a micro pause
- (1.0), (0.5)   indicates silence in seconds and tenths of seconds
- [Okay
- [Yes           Talk which is preceded by a square bracket indicates overlap in speech between two different speakers
- =              Talk marked with the equals sign at the end of one line and the beginning of another indicates no pause between the end of one utterance and the start of another

### Results

Our focussed sample of 30 consultations in total came to 451.30 mins, just over 7.5 hours of consultation time with the average length of the consultation at 15.04 mins. In 7 out of the 30 consultations (just under 60 mins of consultation time) **the patients did not ask any questions.** In the remaining 23 consultations there were 76 instances of patients asking questions (avg. 2.5 direct patient questions per consultation). **However patients' questions arose in different ways. For example,** in 5 out of those 23 consultations (22%) patients' questions came at the end (within 3-4 mins of the end of the consultation) **again** following a prompt from the doctor. In 6 out of the 23 consultations (26%) there is evidence of indirect or embedded questions arising at

1  
2  
3 different junctures of the consultation following a prompt from the doctor. In 12 of the 23  
4 consultations, (52%) patient initiated direct questions occur specifically in relation to discussion  
5 of test results. In 7 of these 12 consultations (58%) patient initiated question asking occurs  
6 following a careful explanation of test results and diagnostic evidence e.g. the doctor's use of  
7 scan or x-rays. In only two consultations did the patient decline to ask a question following an  
8 invitation to do so from the doctor.  
9  
10  
11  
12  
13  
14  
15  
16  
17  
18  
19

20 We noted a number of variations in the way in which doctors deliver test results. Our main  
21 finding, however, is that patients are more inclined to initiate direct questions when doctors  
22 deliver results with direct reference to the diagnostic evidence e.g. x-rays or scans. To exemplify  
23 this we identified two types of information delivery each resulting in different types of patient  
24 response, the most marked difference being levels of patient initiated question asking. In delivery  
25 type 1, test results were delivered in a very general way without elaboration (**Restricted delivery**  
26 - e.g. 'your scan results are fine'). With this type of delivery patient initiated questions were  
27 absent or minimal. In delivery type 2 (**Elaborate delivery** - 'your scan shows that...') the doctor  
28 elaborated or explained the test results sometimes invoking the scan or the x-ray to do so. This  
29 type of delivery typically positively influenced levels of patient involvement in the consultation  
30 and prompted more patient initiated direct questions and consequently more information  
31 provision from the doctor.  
32  
33  
34  
35  
36  
37  
38  
39  
40  
41  
42  
43  
44  
45  
46  
47  
48  
49  
50  
51  
52  
53  
54  
55  
56  
57  
58  
59  
60

## Restricted delivery

**Table 1**

### 0 patient initiated questions

1. Doctor: The CT scan result is here (0.5) and that was
2. basically normal erm nothing to suggest any new no new
3. glands you have got some changes on your erm (4.0) lungs
4. from(.) previous radiotherapy (0.5)uhm (1.5) so that's your
5. CT scan and I'm just trying to find the (0.5) lung function
6. tests(.) when did you have those done
7. Patient: (2.0) had them done
8. Husband: Two weeks ago

**Table 2**

### 0 initiated patient questions

1. Doctor: Okay (.) um (0.5) scan result was fine
2. Patient: Good
3. Doctor: Good okay an everything's stable on the in the
4. bones
5. Patient: Right

**Table 3****0 patient questions**

1. Doctor: Your scan shows everything is the same
2. Patient: Good
3. Doctor: So that's very good

**Table 4****1 patient initiated question**

1. Doctor: And you've had an echocardiogram of your heart an
2. that's all fine
3. Patient: Is it [okay
4. Doctor: [you had that done on?
5. Patient: °Last Friday°
6. Doctor: Last Friday that's all fine (.) no problems so
7. that's good news could I er examine you

The sequences in tables 1-4 show the announcement of diagnostic results depicting the type 1 delivery. In each case the results are delivered in a general, non-specific way characterised by a general clinical assessment, 'fine', 'normal' or 'no change'. In each case this type of delivery

1  
2  
3 produces a minimal response from the patient. It seems that this is partly to do with the fact that  
4  
5 the general delivery projects a paternalistic approach where the doctor presents his/her  
6  
7 interpretation of the results as the authoritative one, without any specific reference to further  
8  
9 details of the findings.<sup>21</sup> Consequently, the patient is invited to accept the diagnostic judgement  
10  
11 of the doctor and the general, non-specific explanation of the results is reflected in the general,  
12  
13 non-specific response provided by the patient.<sup>19</sup> In almost a third of the sample, apart from the  
14  
15 sequence in table 4, the patient does not question or inquire further into the results following the  
16  
17 type 1 delivery. In table 4 the patient does ask a question, but again this is presented in a general  
18  
19 form 'is it okay?' again reflecting the general way in which the results of the echocardiogram is  
20  
21 presented. However, later on following a physical examination the patient targets back on this  
22  
23 assessment, after a physical examination, following a prompt from the doctor.  
24  
25  
26  
27  
28  
29  
30  
31  
32

- 33 1. Doctor: Is there anything you wanted to ask at all?  
34  
35 2. Patient: I did want to ask about my heart function  
36  
37 3. Doctor: Ya sure  
38  
39 4. Patient: I know you said the echocardiograms are oka:y  
40  
41  
42 5. Doctor: Yes  
43  
44 6. Patient: but has it (.) erm deteriorated at all[through  
45  
46  
47 7. Doctor: [no no  
48  
49  
50  
51  
52  
53  
54  
55  
56  
57  
58  
59  
60

**Elaborate delivery****Table 1****1 patient initiated question**

1. Doctor: The head scan, the CT and the MRI show that there
2. is something in the bones but what is unusual is that it
3. seems to be more on the right hand side than the left and I
4. think it was the left eye you were having problems with?
5. Patient: (0.5) Don't they cross?
6. Doctor: Well sometimes if it's more of a visual problem
7. they do cross yeah

In this sequence there are two distinctive features which appear to shape the patient's response. Firstly, the doctor delivers the findings from the scan and produces an expression of uncertainty regarding which eye the patient was having problems with. Secondly, there is a half second pause following the delivery which not only provides the patient with the opportunity to respond but also scope to negotiate the nature of that response.

**Table 2****5 patient initiated questions**

1. Doctor: Your scan shows that things are very much the
2. same, maybe slightly bigger but literally by 4mm both in

1  
2  
3 3. the chest and in the bowel  
4

5 4. Patient: Is it possible for me to see the scan?  
6

7 5. Doctor: Yes, these are your lungs, that's your heart  
8

9 6. Patient: Where's the tumor?  
10

11 7. Doctor: That's it  
12

13 8. Patient: It's there? So when I saw it previously it was  
14

15 9. about that size?  
16

17 10. Doctor: It's only a couple of centimetres most  
18

19 11. Patient: As small as that? In fact it's smaller  
20

21 12. than when I first came about walnut size  
22

23 13. Doctor: It doesn't really say how big it was  
24

25 14. initially  
26

27 15. Patient: So it would be about like that wouldn't it?  
28

29 16. Doctor: Yeah  
30

31 17. Patient: It was on the lymph gland, is that the lymph  
32

33 18. gland?  
34

35 19. Doctor: No that's your bowel that's the tumor and  
36

37 20. that's your bowel there and that's your aneurism  
38

39 21. they've measured it for you 55 mm  
40  
41  
42  
43  
44  
45  
46  
47  
48  
49  
50

51 In this sequence the results are delivered and carefully explicated with the inclusion of numerical  
52 data specifying the size of the cancerous growth (lines 1-3). This provides the patient with a  
53 precise frame of reference regarding the cancer. Interestingly in this case the patient, in response,  
54  
55  
56  
57  
58  
59  
60



1  
2  
3 asks to see the scan (line 4). The doctor then identifies the patient's lungs and heart providing the  
4  
5 relevance for the proximal distance of the tumour from the lungs and heart. The patient (line 6)  
6  
7  
8 then asks about the location of the tumour, its size (lines 8-9, 11) and finally asks about the  
9  
10 lymph gland (line 17-18).  
11  
12  
13  
14  
15

16  
17 **Table 3**

18  
19 **2 patient initiated questions**

- 20  
21  
22 1. Doctor: The scan is very much the same erm there hasn't  
23  
24 2. been um any obvious problems there is quite a lot of  
25  
26 3. fibrosis still but that's to be expected so fibrosis is  
27  
28 4. healing and scarring  
29  
30 5. Patient: Where's that?  
31  
32 6. Doctor: Umm both in the air in the central areas you know  
33  
34 7. where all the problems originally were with the  
35  
36 8. swallowing so in the central area and in the tummy um (2.0)  
37  
38 9. °let me tell you exactly°  
39  
40  
41 10. Patient: Was that there before?  
42  
43 11. Doctor: They've said there's an increase in the volum  
44  
45 12. of that fibrosis  
46  
47 13. Patient: So basically that's scar tissue, is that what  
48  
49 14. you're saying?  
50  
51  
52  
53  
54  
55  
56  
57  
58  
59  
60

1  
2  
3 This delivery of diagnostic news starts out almost as a type 1 delivery ('The scan is very much  
4 the same') but then goes on to point out that fibrosis is still present which is 'to be expected'.  
5  
6

7  
8 The doctor then explains the term fibrosis and the patient responds (line 5) by asking where it is.  
9

10 When the doctor explains the location of the fibrosis, the patient asks if it was present before.  
11

12 The doctor then refers to the report regarding the increase in fibrosis and the patient (line 13)  
13 then presents a gloss of the meaning of the news which is posed as a question.  
14  
15  
16  
17

#### 18 **Table 4**

##### 19 **5 patient initiated questions**

- |    |                                                               |
|----|---------------------------------------------------------------|
| 20 |                                                               |
| 21 |                                                               |
| 22 |                                                               |
| 23 |                                                               |
| 24 |                                                               |
| 25 | 1. Doctor: So they've reported it as stable disease basically |
| 26 | 2. nothing new to find there are some lymph nodes in your     |
| 27 | 3. pelvis but there's nothing different from that             |
| 28 | 4. Patient: Just where exactly?                               |
| 29 | 5. Doctor: Did you want to look at your scan you [can         |
| 30 | 6. Patient: [Will I be                                        |
| 31 | 7. able to tell from that?                                    |
| 32 | 8. Doctor: Well we can look at it together                    |
| 33 | 9. Patient: Yeah                                              |
| 34 | 10. Doctor: (3.0) So this is your pelvis                      |
| 35 | 11. Patient: Right                                            |
| 36 | 12. Doctor: This is your right hip and that is your left      |
| 37 | 13. hip=                                                      |
| 38 | 14. Patient: =Mhm                                             |
| 39 |                                                               |
| 40 |                                                               |
| 41 |                                                               |
| 42 |                                                               |
| 43 |                                                               |
| 44 |                                                               |
| 45 |                                                               |
| 46 |                                                               |
| 47 |                                                               |
| 48 |                                                               |
| 49 |                                                               |
| 50 |                                                               |
| 51 |                                                               |
| 52 |                                                               |
| 53 |                                                               |
| 54 |                                                               |
| 55 |                                                               |
| 56 |                                                               |
| 57 |                                                               |
| 58 |                                                               |
| 59 |                                                               |
| 60 |                                                               |

1  
2  
3  
4 15. Doctor: And then you've got some lymph nodes that are  
5  
6 16. predominantly on the on the right hand side  
7  
8 17. Patient: Yes right so the other side is what they  
9  
10 18. should look like is it?  
11  
12 19. Doctor: Yeah you've got some tiny lymph nodes there  
13  
14 20. they're normally a centimeter and a half is as big as  
15  
16 21. you'd expect them to be normally  
17  
18 22. Patient: Right  
19  
20 23. Doctor: You have got some higher up as well  
21  
22 24. Patient: So that's more into the tummy?  
23  
24 25. Doctor: Yeah  
25  
26 26. Patient: Dya think it is possible that thee enlarged  
27  
28 27. (.) lymph nodes could be (0.5) pressing on a ne::rve  
29  
30 28. [or  
31  
32 29. Doctor: [Sometimes they can do ya ya  
33  
34  
35  
36  
37  
38  
39

40  
41 The diagnostic news in this delivery specifies the fact that there 'are some lymph nodes'. In  
42  
43 response the patient asks 'where' exactly' (line 6). The doctor then asks the patient if they would  
44  
45 like to look at their scan. Interestingly the patient's next question ('will I be able to tell from  
46  
47 that?') at line 7 manifests the knowledge-competence gap between doctors and patients. This  
48  
49 may partly account for why doctors do not always invite patients to look at scan/x-ray results and  
50  
51 why patients do not always ask to see them when they are available. The doctor's response ('we  
52  
53 can look at it together') bridges this gap by inviting the patient to examine the scan jointly  
54  
55  
56  
57  
58  
59  
60

1  
2  
3 allowing the doctor to identify, for the patient, key anatomical structures whilst also allowing the  
4  
5 patient to inquire further.  
6  
7  
8  
9

10  
11 The sequences in tables 1-4 show the announcement of diagnostic results depicting the type 2  
12  
13 delivery. In these sequences the results are delivered alongside a clinical assessment which either  
14  
15 includes a numerical reading or further explication of the findings. When results are delivered in  
16  
17 this way, patients tend to engage with the doctor. An important consequence of this is higher  
18  
19 levels of patient involvement including more patient initiated questions.  
20  
21  
22  
23  
24  
25  
26

## 27 Discussion

28  
29  
30  
31  
32  
33

34 In the main, consultations covered topics such as treatment, the progression of the cancer itself  
35  
36 and the symptoms experienced by the patient. Not all topics were addressed in every consultation  
37  
38 and doctors varied in how they dealt with each topic. We found that generally patients' actual  
39  
40 levels of involvement in the consultation were relatively low and patients varied in how active  
41  
42 they were in seeking information. We also found that, on the whole, patients seemed disinclined  
43  
44 to ask questions or show communication behaviours designed to elicit information. This finding  
45  
46 is consistent with much earlier research into this topic.<sup>6,17</sup>  
47  
48  
49  
50  
51  
52

53 In relation to discussions of test results between doctor and patient, the data appear to indicate  
54  
55 that there may be a connection between the way in which the results are delivered and the  
56  
57 occurrence of patient initiated direct questions. That is to say, the plainer announcement of  
58  
59  
60

1  
2  
3 diagnostic results ('your scan is fine' - Type 1), which does not include sharing the diagnostic  
4  
5 evidence projects a more paternalistic approach implicit in which, the patient is expected to  
6  
7 accept the diagnostic judgement of the doctor. It is also characterised by a general explanation of  
8  
9 the results which is reflected in the general response provided by the patient.<sup>19</sup> In contrast the  
10  
11 Type 2 delivery is much more accommodative of patient input. Moreover, the invocation of the  
12  
13 scan or the x-ray, where appropriate, appears to be significant in encouraging patient  
14  
15 involvement and consequently patient initiated direct questions. Incorporating and explaining the  
16  
17 evidence appears to be interpreted by patients as an opportunity to contribute to the consultation  
18  
19 and establish their information needs in an environment within which the patient's  
20  
21 queries/opinions are welcomed. Unless the patient has specifically requested not to see scans or  
22  
23 x-rays, this would appear to be an effective way of encouraging patient involvement generally  
24  
25 and increasing levels of patient question asking. Consequently, patients are then able to establish  
26  
27 and satisfy their information needs in a timely and effective way.  
28  
29  
30  
31  
32  
33  
34  
35

36 In cases where patients did ask more questions, there was no significant increase in consultation  
37  
38 length and no patient refused the offer of looking at examination results. The examples presented  
39  
40 above were carefully selected because they display the most marked variation in consultation  
41  
42 style highlighting clear contrasts between the two types of delivery.  
43  
44  
45  
46  
47

48 A number of different types of intervention have been used in cancer care to help facilitate  
49  
50 patient involvement. For example, question prompt lists have been used quite widely, but their  
51  
52 actual implementation in consultations is not always straightforward and their rates of success do  
53  
54 vary.<sup>15</sup> Moreover, we found in our study, that even when patients entered the consultation with  
55  
56  
57  
58  
59  
60

1  
2  
3 question lists, they often left the consultation without having asked the questions they came  
4  
5 prepared for.  
6  
7

8  
9  
10 The finding that when the doctor elaborates or explicates findings from the evidence, this can  
11  
12 increase levels of patient involvement has been identified previously in a study of primary care  
13  
14 consultations.<sup>20</sup> Clearly there are important differences between an oncology consultation and a  
15  
16 primary care consultation. However, in relation to consulting behaviours, in both settings there  
17  
18 appear to be striking similarities. That is to say, careful explication of diagnostic findings can  
19  
20 encourage patient involvement such as, in this case, question asking, which in turn can enable  
21  
22 patients to establish their information needs. Further research in this area demands a closer  
23  
24 investigation of what Frankel<sup>9</sup> has described as the ‘presuppositional grounds upon which the  
25  
26 communication situation itself rests’. This would then allow us to identify other consulting  
27  
28 behaviours doctors can utilise to encourage patient involvement.  
29  
30  
31  
32  
33  
34  
35

36 There may be a number of reasons why patients are disinclined to ask questions following the  
37  
38 ‘your scan result is fine’ type of announcement. The minimal responses identified may not  
39  
40 actually be conditioned solely by the type of announcement of test results but may also be a  
41  
42 consequence of patient preference or information needs at that particular moment. As noted, in  
43  
44 Type 1, table 4 the patient targets back on a general assessment of the echocardiogram as ‘okay’.  
45  
46  
47 This clearly merits further empirical investigation.  
48  
49  
50  
51  
52  
53  
54  
55  
56  
57  
58  
59  
60

## Conclusion

1  
2  
3  
4  
5  
6  
7  
8  
9 Currently there is good research evidence indicating that patient initiated question asking should  
10 be encouraged. Doctors need to be able to encourage patient question asking to ensure that  
11 patients have at their disposal an important means through which they can determine and express  
12 their information needs. This study confirms the findings from previous studies showing that  
13 levels of patient initiated questions in Oncology are relatively low. Our study suggests that  
14 patient initiated question asking can be encouraged through timely and deliberate information  
15 giving which incorporates an explanation and display of test results. The findings at this stage are  
16 only suggestive and further exploration is required to establish their actual significance. Studies  
17 which involve closer examination of the actual interactional episodes between doctors and  
18 patients are required to provide a deeper understanding of patient initiated questions and the  
19 situational variables which may influence them.  
20  
21  
22  
23  
24  
25  
26  
27  
28  
29  
30  
31  
32  
33  
34  
35  
36  
37  
38  
39  
40  
41  
42  
43  
44  
45  
46  
47  
48  
49  
50  
51  
52  
53  
54  
55  
56  
57  
58  
59  
60

## References

1. Butow P.N., Maclean M, Dunn S.M., Tattersall M.H.N., Boyer M.J. The dynamics of change: Cancer patients' preferences for information, involvement and support. *Annals of Oncology* 1997; 8: 857-863.
2. Gattellari M, Butow P.N., Tattersall M.H.N. Sharing decisions in cancer care. *Social Science and Medicine* 2001; 52: 1865-1878.
3. Leydon G.M., Boulton M, Moynihan C, Jones A, Mossman J, Boudioni M, et al. Cancer patients' information needs and information seeking behaviour: in-depth interview study. *BMJ* 2000; 320: 909-913.
4. Jenkins V., Fallowfield L., Saul J. Information needs of patients with cancer: results from a large study in UK cancer centres. *British Journal of Cancer* 2001; 84: 48-51.
5. Cox A., Jenkins V., Catt S., Langridge C., and Fallowfield L. Information needs and experiences: An audit of UK cancer patients. *European Journal of Oncology Nursing*. 2006; Vol. 10 Issue 4 263-272.
6. Beisecker A.E. and Beisecker T.D. Patient information seeking behaviours when communicating with doctors. *Medical Care*. 1990; Vol. 28, No. 1: 19-28
7. Cegala D, Marinelli T and Post D. The effect of patient communication skills training on compliance. *Archives of Family Medicine*. 2000; 9: 957-964.
8. Street R.L. and Millay B. Analysing patient participation in medical encounters. *Health Communication*. 2001; Vol. 13, Issue 1: 61-73



- 1  
2  
3 9. Frankel R, Talking in interviews: a dispreference for patient initiated questions in  
4  
5 physician-patient encounters. In Psathas G, (ed.) Interaction Competence. Lanham, MD:  
6  
7 University Press of America, 1990: 231-261  
8  
9
- 10  
11 10. Cegala D, Street R.L., and Clinch R.C. The impact of patient participation on physicians'  
12  
13 information provision during a primary care medical interview. Health Communication,  
14  
15 2007; Vol. 21, Issue 2: 177-185.  
16
- 17  
18 11. Butow P.N. et al. Oncologists reactions to cancer patients' verbal cues. Psycho-oncology.  
19  
20 Vol. 11, Issue 1 2002; 47-58.  
21
- 22  
23 12. Eggly S. et al. Information seeking during "bad news" oncology interactions: Question  
24  
25 asking by patients and their companions. Social Science and Medicine, 2006; 63: 2974-  
26  
27 2985.  
28
- 29  
30 13. Eggly S. et al. Variation in question asking during cancer clinical interactions: A  
31  
32 potential source of disparities in access to information. Patient Education and  
33  
34 Counselling, 2011; Vol. 82, Issue 1: 63-68.  
35
- 36  
37 14. Brown R, Butow PN, Boyer MJ and Tattersall MHN. Promoting patient participation in  
38  
39 the cancer consultation: evaluation of a prompt sheet and coaching in question asking.  
40  
41 British Journal of Cancer 1999; Vol. 80: 242-248  
42
- 43  
44 15. Dimoska A, Tattersall M.H.N, Butow PN, Shepherd H. Can a "prompt list" empower  
45  
46 cancer patients to ask relevant questions. Cancer 2008; Vol. 113, Issue 2: 225-237.  
47
- 48  
49 16. Butow PN, Dunn SM, Tattersall MHN, and Jones QJ. Computer-based interaction  
50  
51 analysis of the cancer consultation. British Journal of Cancer 1995; Vol. 71: 1115-1121.  
52  
53  
54  
55  
56  
57  
58  
59  
60

- 1  
2  
3  
4  
5  
6  
7  
8  
9  
10  
11  
12  
13  
14  
15  
16  
17  
18  
19  
20  
21  
22  
23  
24  
25  
26  
27  
28  
29  
30  
31  
32  
33  
34  
35  
36  
37  
38  
39  
40  
41  
42  
43  
44  
45  
46  
47  
48  
49  
50  
51  
52  
53  
54  
55  
56  
57  
58  
59  
60
17. Street RL Information giving in medical consultations: The influence of patients' communicative styles and personal characteristics. *Social Science and Medicine* 1991; Vol 32. Issue 5: 541-548.
  18. Street RL, Gordon HS, Ward MM, Krupat E, Kravitz RL. Patient participation in medical consultations: Why some patients are more involved than others. *Medical Care* 2005; Vol 43, No. 10: 960-969.
  19. Collins S, Drew P, Watt I, and Entwistle V. 'Unilateral' and 'bilateral' practitioner approaches in decision-making about treatment. *Social Science and Medicine* 2005; 61: 2611-2627.
  20. Perakyla A, Communicating and responding to diagnosis in Heritage J, and Maynard D. (eds.) *Communication in Medical Care*. 2006: 214-247.
  21. Pomerantz A, and E. Sean Rintel. Practices for reporting and responding to test results during medical consultations: enacting the roles of paternalism and independent expertise. *Discourse Studies* 2004; Vol. 6 (1): 9-26.
  22. Heritage J, and Maynard D. *Communication in Medical Care: Interaction between Primary Care Physicians and Patients*. 2006. Cambridge: Cambridge University Press.

### Copyright/licence for publication

“The Corresponding Author has the right to grant on behalf of all authors and does grant on behalf of all authors, a [worldwide licence](#) to the Publishers and its licensees in perpetuity, in all forms, formats and media (whether known now or created in the future), to i) publish, reproduce, distribute, display and store the Contribution, ii) translate the Contribution into other languages, create adaptations, reprints, include within collections and create summaries, extracts and/or, abstracts of the Contribution, iii) create any other derivative work(s) based on the Contribution, iv) to exploit all subsidiary rights in the Contribution, v) the inclusion of electronic links from the Contribution to third party material where-ever it may be located; and, vi) licence any third party to do any or all of the above.”

### Competing interests

All authors have completed the ICMJE uniform disclosure form at [www.icmje.org/coi\\_disclosure.pdf](http://www.icmje.org/coi_disclosure.pdf) (available on request from the corresponding author) and declare: no support from any organisation for the submitted work; no financial relationships with any organisations that might have an interest in the submitted work in the previous three years; no other relationships or activities that could appear to have influenced the submitted work."

### Contributorship statement

All authors contributed to the research study. As PI AT led the study design with contributions from GM and LF. GM and LF led the data collection and analysis with contributions from AT. The first draft of the paper was prepared by GM and then subsequently all authors contributed to data interpretation and revisions to the manuscript. All authors had full access to the data derived from the study and can take full responsibility for the integrity of the data and the accuracy of the data analysis.

### Data sharing

There is no additional data available

### Ethics approval

This paper is an outcome from a study funded by the NIHR Research for Patient Benefit Programme. The funding body did not partake in the design of the study, collection, analysis and interpretation of data, writing and submission of the article for publication. The study received ethical approval from the Nottingham research ethics committee 2 ID: 09/H0408/34. All participants in the study gave informed consent before taking part. All authors are independent

1  
2  
3 from the funding body. Each had had full access to all of the data in the study and can take  
4 responsibility for the integrity of the data and the accuracy of the data analysis  
5  
6

7 This paper presents independent research funded by the National Institute for Health Research  
8 (NIHR) under its Research for Patient Benefit (RfPB) Programme (Grant Reference Number PB-  
9 PG-0807-14122). The views expressed are those of the author(s) and not necessarily those of the  
10 NHS, the NIHR or the Department of Health.  
11  
12  
13  
14  
15  
16  
17  
18  
19  
20  
21  
22  
23  
24  
25  
26  
27  
28  
29  
30  
31  
32  
33  
34  
35  
36  
37  
38  
39  
40  
41  
42  
43  
44  
45  
46  
47  
48  
49  
50  
51  
52  
53  
54  
55  
56  
57  
58  
59  
60

For peer review only

1  
2  
3 **Patient initiated questions: how can doctors encourage them and improve the consultation**  
4 **process? A qualitative study**  
5  
6  
7

8  
9 Dr. GM Murtagh,<sup>1</sup> Dr L Furber<sup>2</sup> Dr. AL Thomas<sup>3</sup>  
10  
11

12  
13  
14  
15  
16 <sup>1</sup> Senior Lecturer in Clinical Communication, Division of Surgery, Department of Surgery and  
17 Cancer, St Mary's Campus, Imperial College London, South Wharf Road, London W2 1BL  
18 [g.murtagh@imperial.ac.uk](mailto:g.murtagh@imperial.ac.uk)  
19  
20  
21

22  
23 <sup>2</sup> Senior Nurse Researcher, Department of Cancer Studies and Molecular Medicine  
24 Robert Knighton Clinical Sciences Building, University of Leicester, Leicester Royal Infirmary,  
25 Leicester LE2 7LX  
26  
27  
28

29  
30 <sup>3</sup> Reader and Consultant in Medical Oncology, Department of Cancer Studies and Molecular  
31 Medicine, Leicester Royal Infirmary  
32 Leicester LE 1 5WW  
33  
34  
35  
36  
37  
38

39 **Correspondence to:**  
40  
41

42 Dr. G.M. Murtagh  
43 Division of Surgery, Department of Surgery and Cancer, St Mary's Hospital,  
44 Imperial College London, South Wharf Road, London W2 1BL  
45  
46 [g.murtagh@imperial.ac.uk](mailto:g.murtagh@imperial.ac.uk)  
47  
48  
49  
50  
51  
52

53 **Manuscript word count 3,505**  
54

55 **Abstract word count: 237**  
56  
57  
58  
59  
60

## Abstract

**Objective:** To investigate the circumstances under which patients initiate direct questions in oncology consultations

**Design:** Conversation analysis of 47 consultations between oncologists and cancer patients

**Setting:** An oncology clinic at a teaching hospital in the East Midlands.

**Participants:** 16 Oncologists and 67 cancer patients

**Outcome measure:** Patient initiated direct questions

**Results:** On the whole patients' direct questions are designed to seek specific information regarding, the cancer itself, treatment options or their experience of symptoms. When patients do ask direct questions they typically follow the announcement of test results where some reference to the details of those results, is provided. More specifically, there appears to be a relation between showing the patient their scan/x-ray results, patient involvement and patient initiated direct questions. Higher levels of patient initiated direct questions were clustered around occasions where doctors provided information and explanations of test results (twelve consultations) sometimes with direct reference to scan or x-ray results (seven consultations).

**Conclusions:** This study highlights the importance of careful explanation of diagnostic evidence as a factor contributing to increased patient involvement. More specifically, the findings suggest

1  
2  
3 that, when appropriate, invoking diagnostic evidence (e.g. scan or x-ray results) is an effective  
4 way of increasing levels of patient question asking. Doctors need to be able to encourage patient  
5 question asking to ensure that patients have at their disposal an important means through which  
6 they can determine their information needs. Although these results come from a study of  
7 oncology consultations, this finding may be transferable to other clinical contexts.  
8  
9  
10  
11  
12  
13  
14  
15  
16  
17  
18  
19  
20  
21  
22  
23  
24  
25  
26  
27  
28  
29  
30  
31  
32  
33  
34  
35  
36  
37  
38  
39  
40  
41  
42  
43  
44  
45  
46  
47  
48  
49  
50  
51  
52  
53  
54  
55  
56  
57  
58  
59  
60

## Article Summary

- In cancer care patient question asking can significantly influence the provision of information from the doctor.
- The paper extends the existing research into communication in cancer care by reporting on distinctive patterns of communication behaviour which influence, in this case, patient question asking.

## Key Messages

- The frequency of direct questions initiated by patients in oncology consultations is relatively low.
- Explicating test results alongside diagnostic evidence increases the chances of patient initiated direct questions in oncology consultations.
- This finding has implications for understanding how doctors can encourage patient questions within cancer care and, potentially, other clinical settings.

## Strengths and Limitations of this study

- The strength of the study is that it targets actual instances of question asking behaviour in relation to other situational variables in the consultation.



- The study is limited by its sole reliance on audio recordings of consultations.

Consequently, other aspects of social interaction, e.g. eye contact, bodily comportment etc which can also have a significant influence on the content of the consultation, have not been included.

For peer review only

## Introduction

One of the main problems oncologists face in the consultation is the difficulty of accurately gauging the patient's information needs.<sup>1,2</sup> Studies have examined patient preferences for information provision and involvement<sup>1,3,4,5</sup> and have shown, among other things, that patients do want specific information concerning their illness.<sup>4,5</sup> However, patients' information needs are not static and there can be significant variations between patients in terms of their preferences for the timing, content and detail of information they require. Such variations may change during the course of an illness and even during the course of a single consultation depending on the type of information a patient receives.<sup>1</sup> Consequently, patients' attempts to elicit information from doctors also varies. These contingencies indicate a real need to understand more about the conditions under which patients actively seek information and, more specifically, the kinds of communication behaviours patients use to seek out information. Among these behaviours, question asking is key, as it can be used as a basic form of information seeking.<sup>6</sup> When patients ask questions it allows them to shape their own levels of involvement<sup>8</sup> and handle the contingencies of information exchange.<sup>9</sup> In addition, patient question asking has been linked to improved information provision.<sup>8,10</sup> Moreover, patients who receive an answer to their question demonstrate better psychological adjustment following the consultation than those who ask questions but don't receive a response.<sup>16,17</sup>

1  
2  
3 These findings still beg the question, how and when do patients ask questions? In the context of  
4 cancer care, studies have shown that direct questions (alongside indirect cues) occur most often  
5 during the treatment phase of the consultation<sup>11</sup>; that companions who accompany patients, tend  
6 to ask more questions than patients particularly in relation to treatment and diagnosis<sup>12</sup>; that  
7 ethnic and racial differences between patients can reflect differences in levels of question asking  
8 and direct question asking<sup>13</sup>; that question prompt lists can encourage patient question asking  
9 particularly in relation to prognosis and diagnosis.<sup>14,15</sup>  
10  
11  
12  
13  
14  
15  
16  
17  
18  
19

20  
21  
22  
23  
24 These studies provide valuable direction in understanding some of the factors behind patient  
25 question asking in cancer care. However, there is still a lot that is unknown about the specific  
26 situational variables which underpin and shape patient question asking in relation to the doctor's  
27 communication behaviours. The extent to which patients initiate information seeking, in the first  
28 place, is often contingent on the doctor's communicative style. The import of this lies in the fact  
29 that when patients seek information (e.g. through asking questions), doctors typically respond in  
30 more informative and accommodative ways,<sup>18</sup> simply because patient questions are one of the  
31 ways in which patients establish their information needs. The purpose of this study was to  
32 capture the interactional and situational variables that occur alongside patient initiated questions  
33 to establish how and when patients are more inclined to initiate direct questions.  
34  
35  
36  
37  
38  
39  
40  
41  
42  
43  
44  
45  
46  
47  
48  
49  
50  
51  
52  
53  
54  
55  
56  
57  
58  
59  
60

## Methods

The study was carried out in a large UK Cancer Centre. LF recruited patients (with different types of cancers) attending the oncology department (n=77) as well as a mix of oncology consultants and specialist registrars. Both newly diagnosed and follow up patients were recruited to ensure maximum variability in our sample group. Following each consultation patients were invited to complete a satisfaction questionnaire and interviews were conducted with the patients by LF shortly after their consultation. **Each of the interviews were analysed to identify common themes across the data until saturation was reached. Patient consent was obtained before their consultation was recorded and before collecting questionnaire data. This paper reports on the recordings of the consultation data only.**

We audio recorded 47 consultations which were then transcribed and analysed using conversation analysis,<sup>22</sup> a method of analysis which details characteristics of speech exchange including pauses, pace and intonation etc (the transcription symbols used to indicate these characteristics are provided in table 1). **In each consultation we identified the number of patient initiated questions which arose. We then examined the location of these questions which allowed us to identify clusters around diagnostic news delivery. We also noted, however, that in other consultations patient initiated questions were minimal or absent on occasions of diagnostic news discussion. This led us to question if there was a relation between the doctor's communication behaviour and the patient's response when doctor and patient talked about test results. Using this as our focal point we identified 30 of the 47 consultations where the relation between style of diagnostic news delivery.**

1  
2  
3 (elaborate/restricted) and patient response/involvement (patient initiated questions/no  
4 patient initiated questions) was most clear. The paper reports on a sample from that selection  
5  
6 of 30. Transcription and analysis was carried out by GM. Subsequent analyses were  
7  
8 carried out by GM, AT and LF. Any disagreements regarding interpretation of the data  
9  
10 were resolved through discussion and by revisiting the data. Inclusion Criteria: Patients  
11  
12 over the age of eighteen, having been diagnosed with cancer, aware of their diagnosis and  
13  
14 willing to participate in the study. Exclusion criteria: Any patient unable to consent for  
15  
16 themselves, patients with a cognitive impairment and patients who do not speak fluent  
17  
18 English.  
19  
20  
21  
22  
23  
24  
25  
26  
27

## 28 Analysis

29  
30  
31 For the purposes of analysis we defined a direct question as that which is initiated solely by the  
32  
33 patient, without a verbal prompt ('Do you have any questions?') from the doctor and which  
34  
35 targets a specific topic. The consultations were examined with a view to identifying some of the  
36  
37 systematic and recurrent properties of delivering news of test results and the patient's response.  
38  
39 More specifically, we examined how styles of news delivery shape patients' responses, in  
40  
41 particular their levels of question asking.  
42  
43  
44  
45  
46  
47  
48  
49  
50

### 51 Transcription symbols

- 52  
53 • • Talk marked by the degree sound indicates words that are softly spoken  
54  
55 (.) A full stop in brackets indicates a micro pause  
56  
57  
58  
59  
60

(1.0), (0.5) indicates silence in seconds and tenths of seconds

[Okay

[Yes Talk which is preceded by a square bracket indicates overlap in speech between two different speakers

= Talk marked with the equals sign at the end of one line and the beginning of another indicates no pause between the end of one utterance and the start of another

## Results

Our focussed sample of 30 consultations in total came to 451.30 mins, just over 7.5 hours of consultation time with the average length of the consultation at 15.04 mins. In 7 out of the 30 consultations (just under 60 mins of consultation time) **the patients did not ask any questions.** In the remaining 23 consultations there were 76 instances of patients asking questions (avg. 2.5 direct patient questions per consultation). **However patients' questions arose in different ways. For example,** in 5 out of those 23 consultations (22%) patients' questions came at the end (within 3-4 mins of the end of the consultation) **again** following a prompt from the doctor. In 6 out of the 23 consultations (26%) there is evidence of indirect or embedded questions arising at different junctures of the consultation following a prompt from the doctor. In 12 of the 23 consultations, (52%) patient initiated direct questions occur specifically in relation to discussion of test results. In 7 of these 12 consultations (58%) patient initiated question asking occurs

1  
2  
3 following a careful explanation of test results and diagnostic evidence e.g. the doctor's use of  
4 scan or x-rays. In only two consultations did the patient decline to ask a question following an  
5 invitation to do so from the doctor.  
6  
7  
8  
9

10  
11  
12 We noted a number of variations in the way in which doctors deliver test results. Our main  
13 finding, however, is that patients are more inclined to initiate direct questions when doctors  
14 deliver results with direct reference to the diagnostic evidence e.g. x-rays or scans. To exemplify  
15 this we identified two types of information delivery each resulting in different types of patient  
16 response, the most marked difference being levels of patient initiated question asking. In delivery  
17 type 1, test results were delivered in a very general way without elaboration (**Restricted delivery**  
18 - e.g. 'your scan results are fine'). With this type of delivery patient initiated questions were  
19 absent or minimal. In delivery type 2 (**Elaborate delivery** - 'your scan shows that...') the doctor  
20 elaborated or explained the test results sometimes invoking the scan or the x-ray to do so. This  
21 type of delivery typically positively influenced levels of patient involvement in the consultation  
22 and prompted more patient initiated direct questions and consequently more information  
23 provision from the doctor.  
24  
25  
26  
27  
28  
29  
30  
31  
32  
33  
34  
35  
36  
37  
38  
39  
40  
41  
42  
43  
44  
45  
46  
47  
48  
49

## 50 **Restricted delivery**

### 51 **Table 1**

#### 52 **0 patient initiated questions**

1. Doctor: The CT scan result is here (0.5) and that was
2. basically normal erm nothing to suggest any new no new
3. glands you have got some changes on your erm (4.0) lungs
4. from(.) previous radiotherapy (0.5) uhm (1.5) so that's your
5. CT scan and I'm just trying to find the (0.5) lung function
6. tests(.) when did you have those done
7. Patient: (2.0) had them done
8. Husband: Two weeks ago

## Table 2

### 0 initiated patient questions

1. Doctor: Okay (.) um (0.5) scan result was fine
2. Patient: Good
3. Doctor: Good okay an everything's stable on the in the
4. bones
5. Patient: Right

## Table 3

### 0 patient questions



1. Doctor: Your scan shows everything is the same
2. Patient: Good
3. Doctor: So that's very good

**Table 4****1 patient initiated question**

1. Doctor: And you've had an echocardiogram of your heart an
2. that's all fine
3. Patient: Is it [okay
4. Doctor: [you had that done on?
5. Patient: °Last Friday°
6. Doctor: Last Friday that's all fine (.) no problems so
7. that's good news could I er examine you

The sequences in tables 1-4 show the announcement of diagnostic results depicting the type 1 delivery. In each case the results are delivered in a general, non-specific way characterised by a general clinical assessment, 'fine', 'normal' or 'no change'. In each case this type of delivery produces a minimal response from the patient. It seems that this is partly to do with the fact that the general delivery projects a paternalistic approach where the doctor presents his/her interpretation of the results as the authoritative one, without any specific reference to further

1  
2  
3 details of the findings.<sup>21</sup> Consequently, the patient is invited to accept the diagnostic judgement  
4 of the doctor and the general, non-specific explanation of the results is reflected in the general,  
5 non-specific response provided by the patient.<sup>19</sup> In almost a third of the sample, apart from the  
6 sequence in table 4, the patient does not question or inquire further into the results following the  
7 type 1 delivery. In table 4 the patient does ask a question, but again this is presented in a general  
8 form 'is it okay?' again reflecting the general way in which the results of the echocardiogram is  
9 presented. However, later on following a physical examination the patient targets back on this  
10 assessment, after a physical examination, following a prompt from the doctor.  
11  
12  
13  
14  
15  
16  
17  
18  
19  
20  
21  
22  
23

- 24  
25  
26 1. Doctor: Is there anything you wanted to ask at all?  
27  
28 2. Patient: I did want to ask about my heart function  
29  
30 3. Doctor: Ya sure  
31  
32 4. Patient: I know you said the echocardiograms are oka:y  
33  
34 5. Doctor: Yes  
35  
36 6. Patient: but has it (.) erm deteriorated at all[through  
37  
38 7. Doctor: [no no  
39  
40  
41  
42  
43  
44  
45  
46  
47  
48  
49  
50

51  
52  
53 **Elaborate delivery**

54  
55  
56 **Table 1**  
57  
58  
59  
60

### 1patient initiated question

1. Doctor: The head scan, the CT and the MRI show that there
2. is something in the bones but what is unusual is that it
3. seems to be more on the right hand side than the left and I
4. think it was the left eye you were having problems with?
5. Patient: (0.5) Don't they cross?
6. Doctor: Well sometimes if it's more of a visual problem
7. they do cross yeah

In this sequence there are two distinctive features which appear to shape the patient's response. Firstly, the doctor delivers the findings from the scan and produces an expression of uncertainty regarding which eye the patient was having problems with. Secondly, there is a half second pause following the delivery which not only provides the patient with the opportunity to respond but also scope to negotiate the nature of that response.

### Table 2

#### 5 patient initiated questions

1. Doctor: Your scan shows that things are very much the
2. same, maybe slightly bigger but literally by 4mm both in
3. the chest and in the bowel
4. Patient: Is it possible for me to see the scan?
5. Doctor: Yes, these are your lungs, that's your heart

1  
2  
3  
4  
5  
6  
7  
8  
9  
10  
11  
12  
13  
14  
15  
16  
17  
18  
19  
20  
21  
22  
23  
24  
25  
26  
27  
28  
29  
30  
31  
32  
33  
34  
35  
36  
37  
38  
39  
40  
41  
42  
43  
44  
45  
46  
47  
48  
49  
50  
51  
52  
53  
54  
55  
56  
57  
58  
59  
60

6. Patient: Where's the tumor?

7. Doctor: That's it

8. Patient: It's there? So when I saw it previously it was

9. about that size?

10. Doctor: It's only a couple of centimetres most

11. Patient: As small as that? In fact it's smaller

12. than when I first came about walnut size

13. Doctor: It doesn't really say how big it was

14. initially

15. Patient: So it would be about like that wouldn't it?

16. Doctor: Yeah

17. Patient: It was on the lymph gland, is that the lymph

18. gland?

19. Doctor: No that's your bowel that's the tumor and

20. that's your bowel there and that's your aneurism

21. they've measured it for you 55 mm

In this sequence the results are delivered and carefully explicated with the inclusion of numerical data specifying the size of the cancerous growth (lines 1-3). This provides the patient with a precise frame of reference regarding the cancer. Interestingly in this case the patient, in response, asks to see the scan (line 4). The doctor then identifies the patient's lungs and heart providing the relevance for the proximal distance of the tumour from the lungs and heart. The patient (line 6)

then asks about the location of the tumour, its size (lines 8-9, 11) and finally asks about the lymph gland (line 17-18).

**Table 3**

**2 patient initiated questions**

1. Doctor: The scan is very much the same erm there hasn't
2. been um any obvious problems there is quite a lot of
3. fibrosis still but that's to be expected so fibrosis is
4. healing and scarring
5. Patient: Where's that?
6. Doctor: Umm both in the air in the central areas you know
7. where all the problems originally were with the
8. swallowing so in the central area and in the tummy um (2.0)
9. °let me tell you exactly°
10. Patient: Was that there before?
11. Doctor: They've said there's an increase in the volum
12. of that fibrosis
13. Patient: So basically that's scar tissue, is that what
14. you're saying?

This delivery of diagnostic news starts out almost as a type 1 delivery ('The scan is very much the same') but then goes on to point out that fibrosis is still present which is 'to be expected'.

The doctor then explains the term fibrosis and the patient responds (line 5) by asking where it is.

1  
2  
3 When the doctor explains the location of the fibrosis, the patient asks if it was present before.  
4  
5  
6 The doctor then refers to the report regarding the increase in fibrosis and the patient (line 13)  
7  
8 then presents a gloss of the meaning of the news which is posed as a question.  
9  
10

11 **Table 4**

12  
13  
14 **5 patient initiated questions**  
15

- 16  
17  
18  
19 1. Doctor: So they've reported it as stable disease basically  
20  
21 2. nothing new to find there are some lymph nodes in your  
22  
23 3. pelvis but there's nothing different from that  
24  
25 4. Patient: Just where exactly?  
26  
27  
28 5. Doctor: Did you want to look at your scan you [can  
29  
30 6. Patient: [Will I be  
31  
32 7. able to tell from that?  
33  
34  
35 8. Doctor: Well we can look at it together  
36  
37 9. Patient: Yeah  
38  
39 10. Doctor: (3.0) So this is your pelvis  
40  
41 11. Patient: Right  
42  
43  
44 12. Doctor: This is your right hip and that is your left  
45  
46 13. hip=  
47  
48 14. Patient: =Mhm  
49  
50  
51 15. Doctor: And then you've got some lymph nodes that are  
52  
53 16. predominantly on the on the right hand side  
54  
55  
56 17. Patient: Yes right so the other side is what they  
57  
58  
59  
60

1  
2  
3  
4  
5  
6  
7  
8  
9  
10  
11  
12  
13  
14  
15  
16  
17  
18  
19  
20  
21  
22  
23  
24  
25  
26  
27  
28  
29  
30  
31  
32

18. should look like is it?

19. Doctor: Yeah you've got some tiny lymph nodes there

20. they're normally a centimeter and a half is as big as

21. you'd expect them to be normally

22. Patient: Right

23. Doctor: You have got some higher up as well

24. Patient: So that's more into the tummy?

25. Doctor: Yeah

26. Patient: Dya think it is possible that thee enlarged

27. (.) lymph nodes could be (0.5) pressing on a ne::rve

28. [or

29. Doctor: [Sometimes they can do ya ya

33  
34  
35  
36  
37  
38  
39  
40  
41  
42  
43  
44  
45  
46  
47  
48  
49  
50  
51  
52  
53  
54  
55  
56  
57  
58  
59  
60

The diagnostic news in this delivery specifies the fact that there 'are some lymph nodes'. In response the patient asks 'where' exactly' (line 6). The doctor then asks the patient if they would like to look at their scan. Interestingly the patient's next question ('will I be able to tell from that?') at line 7 manifests the knowledge-competence gap between doctors and patients. This may partly account for why doctors do not always invite patients to look at scan/x-ray results and why patients do not always ask to see them when they are available. The doctor's response ('we can look at it together') bridges this gap by inviting the patient to examine the scan jointly allowing the doctor to identify, for the patient, key anatomical structures whilst also allowing the patient to inquire further.

1  
2  
3 The sequences in tables 1-4 show the announcement of diagnostic results depicting the type 2  
4 delivery. In these sequences the results are delivered alongside a clinical assessment which either  
5 includes a numerical reading or further explication of the findings. When results are delivered in  
6 this way, patients tend to engage with the doctor. An important consequence of this is higher  
7 levels of patient involvement including more patient initiated questions.  
8  
9  
10  
11  
12  
13  
14  
15  
16  
17  
18  
19

## 20 Discussion

21  
22  
23  
24  
25 In the main, consultations covered topics such as treatment, the progression of the cancer itself  
26 and the symptoms experienced by the patient. Not all topics were addressed in every consultation  
27 and doctors varied in how they dealt with each topic. We found that generally patients' actual  
28 levels of involvement in the consultation were relatively low and patients varied in how active  
29 they were in seeking information. We also found that, on the whole, patients seemed disinclined  
30 to ask questions or show communication behaviours designed to elicit information. This finding  
31 is consistent with much earlier research into this topic.<sup>6,17</sup>  
32  
33  
34  
35  
36  
37  
38  
39  
40  
41  
42  
43  
44

45 In relation to discussions of test results between doctor and patient, the data appear to indicate  
46 that there may be a connection between the way in which the results are delivered and the  
47 occurrence of patient initiated direct questions. That is to say, the plainer announcement of  
48 diagnostic results ('your scan is fine' - Type 1), which does not include sharing the diagnostic  
49 evidence projects a more paternalistic approach implicit in which, the patient is expected to  
50 accept the diagnostic judgement of the doctor. It is also characterised by a general explanation of  
51  
52  
53  
54  
55  
56  
57  
58  
59  
60



1  
2  
3 the results which is reflected in the general response provided by the patient.<sup>19</sup> In contrast the  
4  
5 Type 2 delivery is much more accommodative of patient input. Moreover, the invocation of the  
6  
7 scan or the x-ray, where appropriate, appears to be significant in encouraging patient  
8  
9 involvement and consequently patient initiated direct questions. Incorporating and explaining the  
10  
11 evidence appears to be interpreted by patients as an opportunity to contribute to the consultation  
12  
13 and establish their information needs in an environment within which the patient's  
14  
15 queries/opinions are welcomed. Unless the patient has specifically requested not to see scans or  
16  
17 x-rays, this would appear to be an effective way of encouraging patient involvement generally  
18  
19 and increasing levels of patient question asking. Consequently, patients are then able to establish  
20  
21 and satisfy their information needs in a timely and effective way.  
22  
23  
24  
25  
26  
27  
28

29 In cases where patients did ask more questions, there was no significant increase in consultation  
30  
31 length and no patient refused the offer of looking at examination results. The examples presented  
32  
33 above were carefully selected because they display the most marked variation in consultation  
34  
35 style highlighting clear contrasts between the two types of delivery.  
36  
37  
38  
39  
40

41 A number of different types of intervention have been used in cancer care to help facilitate  
42  
43 patient involvement. For example, question prompt lists have been used quite widely, but their  
44  
45 actual implementation in consultations is not always straightforward and their rates of success do  
46  
47 vary.<sup>15</sup> Moreover, we found in our study, that even when patients entered the consultation with  
48  
49 question lists, they often left the consultation without having asked the questions they came  
50  
51 prepared for.  
52  
53  
54  
55  
56  
57  
58  
59  
60

1  
2  
3 The finding that when the doctor elaborates or explicates findings from the evidence, this can  
4 increase levels of patient involvement has been identified previously in a study of primary care  
5 consultations.<sup>20</sup> Clearly there are important differences between an oncology consultation and a  
6 primary care consultation. However, in relation to consulting behaviours, in both settings there  
7 appear to be striking similarities. That is to say, careful explication of diagnostic findings can  
8 encourage patient involvement such as, in this case, question asking, which in turn can enable  
9 patients to establish their information needs. Further research in this area demands a closer  
10 investigation of what Frankel<sup>9</sup> has described as the ‘presuppositional grounds upon which the  
11 communication situation itself rests’. This would then allow us to identify other consulting  
12 behaviours doctors can utilise to encourage patient involvement.  
13  
14  
15  
16  
17  
18  
19  
20  
21  
22  
23  
24  
25  
26  
27  
28

29 There may be a number of reasons why patients are disinclined to ask questions following the  
30 ‘your scan result is fine’ type of announcement. The minimal responses identified may not  
31 actually be conditioned solely by the type of announcement of test results but may also be a  
32 consequence of patient preference or information needs at that particular moment. As noted, in  
33 Type 1, table 4 the patient targets back on a general assessment of the echocardiogram as ‘okay’.  
34  
35  
36  
37  
38  
39 This clearly merits further empirical investigation.  
40  
41  
42  
43  
44  
45  
46  
47  
48  
49  
50  
51  
52

## 53 **Conclusion**

54  
55  
56  
57  
58  
59  
60

1  
2  
3 Currently there is good research evidence indicating that patient initiated question asking should  
4  
5 be encouraged. Doctors need to be able to encourage patient question asking to ensure that  
6  
7 patients have at their disposal an important means through which they can determine and express  
8  
9 their information needs. This study confirms the findings from previous studies showing that  
10  
11 levels of patient initiated questions in Oncology are relatively low. Our study suggests that  
12  
13 patient initiated question asking can be encouraged through timely and deliberate information  
14  
15 giving which incorporates an explanation and display of test results. The findings at this stage are  
16  
17 only suggestive and further exploration is required to establish their actual significance. Studies  
18  
19 which involve closer examination of the actual interactional episodes between doctors and  
20  
21 patients are required to provide a deeper understanding of patient initiated questions and the  
22  
23 situational variables which may influence them.  
24  
25  
26  
27  
28  
29  
30  
31  
32  
33  
34  
35  
36  
37  
38  
39  
40  
41  
42  
43  
44  
45  
46  
47  
48  
49  
50  
51  
52  
53  
54  
55  
56  
57  
58  
59  
60

## References

1. Butow P.N., Maclean M, Dunn S.M., Tattersall M.H.N., Boyer M.J. The dynamics of change: Cancer patients' preferences for information, involvement and support. *Annals of Oncology* 1997; 8: 857-863.
2. Gattellari M, Butow P.N., Tattersall M.H.N. Sharing decisions in cancer care. *Social Science and Medicine* 2001; 52: 1865-1878.
3. Leydon G.M., Boulton M, Moynihan C, Jones A, Mossman J, Boudioni M, et al. Cancer patients' information needs and information seeking behaviour: in-depth interview study. *BMJ* 2000; 320: 909-913.
4. Jenkins V., Fallowfield L., Saul J. Information needs of patients with cancer: results from a large study in UK cancer centres. *British Journal of Cancer* 2001; 84: 48-51.
5. Cox A., Jenkins V., Catt S., Langridge C., and Fallowfield L. Information needs and experiences: An audit of UK cancer patients. *European Journal of Oncology Nursing*. 2006; Vol. 10 Issue 4 263-272.
6. Beisecker A.E. and Beisecker T.D. Patient information seeking behaviours when communicating with doctors. *Medical Care*. 1990; Vol. 28, No. 1: 19-28
7. Cegala D, Marinelli T and Post D. The effect of patient communication skills training on compliance. *Archives of Family Medicine*. 2000; 9: 957-964.
8. Street R.L. and Millay B. Analysing patient participation in medical encounters. *Health Communication*. 2001; Vol. 13, Issue 1: 61-73

- 1  
2  
3 9. Frankel R, Talking in interviews: a dispreference for patient initiated questions in  
4  
5 physician-patient encounters. In Psathas G, (ed.) Interaction Competence. Lanham, MD:  
6  
7 University Press of America, 1990: 231-261  
8  
9
- 10  
11 10. Cegala D, Street R.L., and Clinch R.C. The impact of patient participation on physicians'  
12  
13 information provision during a primary care medical interview. Health Communication,  
14  
15 2007; Vol. 21, Issue 2: 177-185.  
16
- 17  
18 11. Butow P.N. et al. Oncologists reactions to cancer patients' verbal cues. Psycho-oncology.  
19  
20 Vol. 11, Issue 1 2002; 47-58.  
21
- 22  
23 12. Eggly S. et al. Information seeking during "bad news" oncology interactions: Question  
24  
25 asking by patients and their companions. Social Science and Medicine, 2006; 63: 2974-  
26  
27 2985.  
28
- 29  
30 13. Eggly S. et al. Variation in question asking during cancer clinical interactions: A  
31  
32 potential source of disparities in access to information. Patient Education and  
33  
34 Counselling, 2011; Vol. 82, Issue 1: 63-68.  
35
- 36  
37 14. Brown R, Butow PN, Boyer MJ and Tattersall MHN. Promoting patient participation in  
38  
39 the cancer consultation: evaluation of a prompt sheet and coaching in question asking.  
40  
41 British Journal of Cancer 1999; Vol. 80: 242-248  
42
- 43  
44 15. Dimoska A, Tattersall M.H.N, Butow PN, Shepherd H. Can a "prompt list" empower  
45  
46 cancer patients to ask relevant questions. Cancer 2008; Vol. 113, Issue 2: 225-237.  
47
- 48  
49 16. Butow PN, Dunn SM, Tattersall MHN, and Jones QJ. Computer-based interaction  
50  
51 analysis of the cancer consultation. British Journal of Cancer 1995; Vol. 71: 1115-1121.  
52  
53  
54  
55  
56  
57  
58  
59  
60

- 1  
2  
3  
4  
5  
6  
7  
8  
9  
10  
11  
12  
13  
14  
15  
16  
17  
18  
19  
20  
21  
22  
23  
24  
25  
26  
27  
28  
29  
30  
31  
32  
33  
34  
35  
36  
37  
38  
39  
40  
41  
42  
43  
44  
45  
46  
47  
48  
49  
50  
51  
52  
53  
54  
55  
56  
57  
58  
59  
60
17. Street RL Information giving in medical consultations: The influence of patients' communicative styles and personal characteristics. *Social Science and Medicine* 1991; Vol 32. Issue 5: 541-548.
  18. Street RL, Gordon HS, Ward MM, Krupat E, Kravitz RL. Patient participation in medical consultations: Why some patients are more involved than others. *Medical Care* 2005; Vol 43, No. 10: 960-969.
  19. Collins S, Drew P, Watt I, and Entwistle V. 'Unilateral' and 'bilateral' practitioner approaches in decision-making about treatment. *Social Science and Medicine* 2005; 61: 2611-2627.
  20. Perakyla A, Communicating and responding to diagnosis in Heritage J, and Maynard D. (eds.) *Communication in Medical Care*. 2006: 214-247.
  21. Pomerantz A, and E. Sean Rintel. Practices for reporting and responding to test results during medical consultations: enacting the roles of paternalism and independent expertise. *Discourse Studies* 2004; Vol. 6 (1): 9-26.
  22. Heritage J, and Maynard D. *Communication in Medical Care: Interaction between Primary Care Physicians and Patients*. 2006. Cambridge: Cambridge University Press.

### Copyright/licence for publication

“The Corresponding Author has the right to grant on behalf of all authors and does grant on behalf of all authors, a [worldwide licence](#) to the Publishers and its licensees in perpetuity, in all forms, formats and media (whether known now or created in the future), to i) publish, reproduce, distribute, display and store the Contribution, ii) translate the Contribution into other languages, create adaptations, reprints, include within collections and create summaries, extracts and/or, abstracts of the Contribution, iii) create any other derivative work(s) based on the Contribution, iv) to exploit all subsidiary rights in the Contribution, v) the inclusion of electronic links from the Contribution to third party material where-ever it may be located; and, vi) licence any third party to do any or all of the above.”

### Competing interests

All authors have completed the ICMJE uniform disclosure form at [www.icmje.org/coi\\_disclosure.pdf](http://www.icmje.org/coi_disclosure.pdf) (available on request from the corresponding author) and declare: no support from any organisation for the submitted work; no financial relationships with any organisations that might have an interest in the submitted work in the previous three years; no other relationships or activities that could appear to have influenced the submitted work."

### Contributorship statement

All authors contributed to the research study. As PI AT led the study design with contributions from GM and LF. GM and LF led the data collection and analysis with contributions from AT. The first draft of the paper was prepared by GM and then subsequently all authors contributed to data interpretation and revisions to the manuscript. All authors had full access to the data derived from the study and can take full responsibility for the integrity of the data and the accuracy of the data analysis.

### Data sharing

There is no additional data available

### Ethics approval

This paper is an outcome from a study funded by the NIHR Research for Patient Benefit Programme. The funding body did not partake in the design of the study, collection, analysis and interpretation of data, writing and submission of the article for publication. The study received ethical approval from the Nottingham research ethics committee 2 ID: 09/H0408/34. All participants in the study gave informed consent before taking part. All authors are independent

1  
2  
3 from the funding body. Each had had full access to all of the data in the study and can take  
4 responsibility for the integrity of the data and the accuracy of the data analysis  
5  
6

7 This paper presents independent research funded by the National Institute for Health Research  
8 (NIHR) under its Research for Patient Benefit (RfPB) Programme (Grant Reference Number PB-  
9 PG-0807-14122). The views expressed are those of the author(s) and not necessarily those of the  
10 NHS, the NIHR or the Department of Health.  
11  
12  
13  
14  
15  
16  
17  
18  
19  
20  
21  
22  
23  
24  
25  
26  
27  
28  
29  
30  
31  
32  
33  
34  
35  
36  
37  
38  
39  
40  
41  
42  
43  
44  
45  
46  
47  
48  
49  
50  
51  
52  
53  
54  
55  
56  
57  
58  
59  
60

For peer review only



# Please wait...

If this message is not eventually replaced by the proper contents of the document, your PDF viewer may not be able to display this type of document.

You can upgrade to the latest version of Adobe Reader for Windows®, Mac, or Linux® by visiting <http://www.adobe.com/products/acrobat/readstep2.html>.

For more assistance with Adobe Reader visit <http://www.adobe.com/support/products/acrreader.html>.

Windows is either a registered trademark or a trademark of Microsoft Corporation in the United States and/or other countries. Mac is a trademark of Apple Inc., registered in the United States and other countries. Linux is the registered trademark of Linus Torvalds in the U.S. and other countries.

# Please wait...

If this message is not eventually replaced by the proper contents of the document, your PDF viewer may not be able to display this type of document.

You can upgrade to the latest version of Adobe Reader for Windows®, Mac, or Linux® by visiting [http://www.adobe.com/go/reader\\_download](http://www.adobe.com/go/reader_download).

For more assistance with Adobe Reader visit <http://www.adobe.com/go/acrreader>.

Windows is either a registered trademark or a trademark of Microsoft Corporation in the United States and/or other countries. Mac is a trademark of Apple Inc., registered in the United States and other countries. Linux is the registered trademark of Linus Torvalds in the U.S. and other countries.

# Please wait...

If this message is not eventually replaced by the proper contents of the document, your PDF viewer may not be able to display this type of document.

You can upgrade to the latest version of Adobe Reader for Windows®, Mac, or Linux® by visiting [http://www.adobe.com/go/reader\\_download](http://www.adobe.com/go/reader_download).

For more assistance with Adobe Reader visit <http://www.adobe.com/go/acrreader>.

Windows is either a registered trademark or a trademark of Microsoft Corporation in the United States and/or other countries. Mac is a trademark of Apple Inc., registered in the United States and other countries. Linux is the registered trademark of Linus Torvalds in the U.S. and other countries.
